# Supplementary material for: Molecular Structure of Salicylic Acid and Its Hydrates: A Rotational Spectroscopy Study
Source: MDPI journal article supplement (doi:10.3390/ijms25074074), 2024-04-06
Supplement: s1 [file s1]

# Molecular Structure of Salicylic Acid and its Hydrates: A Rotational Spectroscopy Study

## Supporting Information

### Contents:

Determination of the  $\theta$  angle

Figure S1. Rotational spectra of salicylic acid and its water complexes.

Figure S2. Predicted stable conformers of salicylic acid monomer.

Figure S3. Predicted stable conformers of the monohydrated complex of salicylic acid.

Figure S4. Predicted stable conformers of the dihydrated complex of salicylic acid.

Figure S5. Predicted stable conformers of the trihydrated complex of salicylic acid.

Figure S6. Predicted stable conformers of the tetrahydrated complex of salicylic acid.

Figure S7. Results of Quantum Theory of "atoms in molecules" (QTAIM) and non-covalent interaction (NCI) analyses for the observed conformer I of salicylic acid.

Figure S8. Results of Quantum Theory of "atoms in molecules" (QTAIM) and non-covalent interaction (NCI) analyses for the observed conformer I-w-a of the monohydrated complex of salicylic acid.

Figure S9. Results of Quantum Theory of "atoms in molecules" (QTAIM) and non-covalent interaction (NCI) analyses for the observed conformer I-w<sub>2</sub>-a of the dihydrated cluster of salicylic acid.

Figure S10. Results of Quantum Theory of "atoms in molecules" (QTAIM) and non-covalent interaction (NCI) analyses for the observed conformer I-w<sub>3</sub>-a of the trihydrated complex of salicylic acid.

Figure S11. Results of Quantum Theory of "atoms in molecules" (QTAIM) and non-covalent interaction (NCI) analyses for the observed conformer I-w<sub>4</sub>-a of the tetrahydrated cluster of salicylic acid.

Figure S12. Possible path for inversion for the conformer I-w<sub>3</sub>-a. It was calculated in two steps by scanning successively the flipping angles  $\alpha$  and  $\beta$ . Through this path small potential energy barriers allow the interconversion between two equivalent forms. Calculations have been done at B3LYP-D3/6-311++G(d,p) level of theory.

Table S1. Rotational parameters predicted from B3LYP-D3/6-311++G(d,p) level of theory for the stable conformers of salicylic acid monomer.

Table S2. Rotational parameters predicted from B3LYP-D3/6-311++G(d,p) level of theory for the stable conformers of the monohydrated complex of salicylic acid.

Table S3. Rotational parameters predicted from B3LYP-D3/6-311++G(d,p) level of theory for the stable conformers of the dihydrated complex of salicylic acid.

Table S4. Rotational parameters predicted from B3LYP-D3/6-311++G(d,p) level of theory for the stable conformers of the trihydrated complex of salicylic acid.

Table S5. Rotational parameters predicted from B3LYP-D3/6-311++G(d,p) level of theory for the stable conformers of the tetrahydrated complex of salicylic acid.

Table S6. Rotational parameters experimentally determined for the for all the observed  $^{13}\text{C}$  and D isotopologues of conformer I of salicylic acid.

Table S7. Rotational parameters experimentally determined for all the observed D isotopologues of conformer I-w-a of salicylic acid – water cluster.

Table S8.  $r_s$ ,  $r_m$ ,  $r_a$  and  $r_e$  geometrical parameters for conformer I of salicylic acid.

Table S9.  $r_s$ ,  $r_m$  and  $r_e$  coordinates determined for conformer I of salicylic acid.

Table S10. Donor-acceptor stabilizing energies predicted from NBO calculations at B3LP-D3/6-311++G(d,p) level of theory for all the observed I, I-w-a, I-w<sub>2</sub>-a, I-w<sub>3</sub>-a and I-w<sub>4</sub>-a species of the salicylic acid and its hydrated complexes.

Table S11. Bond orders predicted from NBO calculations at B3LP-D3/6-311++G(d,p) level of theory for all the observed I, I-w-a, I-w<sub>2</sub>-a, I-w<sub>3</sub>-a and I-w<sub>4</sub>-a species of the salicylic acid and its hydrated complexes.

Table S12.  $r_s$ ,  $r_0$  and  $r_e$  geometrical parameters determined for conformer I-w-a of the monohydrated complex of salicylic acid.

Table S13.  $r_s$ ,  $r_0$  and  $r_e$  coordinates determined for conformer I-w-a of the monohydrated complex of salicylic acid.

Table S14.  $r_e$  geometrical parameters predicted for conformer I-w<sub>2</sub>-a of the dihydrated complex of salicylic acid.

Table S15.  $r_e$  geometrical parameters predicted for conformer I-w<sub>3</sub>-a of the trihydrated complex of salicylic acid.

Table S16.  $r_e$  geometrical parameters predicted for conformer I-w<sub>4</sub>-a of the tetrahydrated complex of salicylic acid.

Table S17. Transition frequencies of conformer I of salicylic acid monomer.

Table S18. Transition frequencies of all the observed  $^{13}\text{C}$  isotopologues of conformer I of salicylic acid monomer.

Table S19. Transition frequencies of all the observed D isotopologues of conformer I of salicylic acid monomer.

Table S20. Transition frequencies of conformer I-w-a of salicylic acid – water complex.

Table S21. Transition frequencies of all the observed D isotopologues of conformer I-w-a of salicylic acid – water complex.

Table S22. Transition frequencies of conformer I-w<sub>2</sub>-a of salicylic acid – water<sub>2</sub> complex.

Table S23. Transition frequencies of conformer I-w<sub>3</sub>-a of salicylic acid – water<sub>2</sub> complex.

Table S24. Transition frequencies of conformer I-w<sub>4</sub>-a of salicylic acid – water<sub>2</sub> complex.

### Determination of the $\theta$ angle

For monohydrated complexes with a planar or nearly planar structure, in which the  $ab$  inertial plane roughly overlaps with the same inertial plane of the monomer form, Ouyang and Howard [31] developed a method in order to determine the angle  $\theta$  between the  $a$  principal axis of the monomer form and the intermolecular axis of the cluster using the next expression:

$$\sin^2 \theta = \frac{I_A(\mu R_{CM}^2 + I_a + I_b - I_A) - I_a(\mu R_{CM}^2 + I_b)}{\mu R_{CM}^2(I_b - I_a)} \quad (1)$$

where  $I_A$ ,  $I_B$  and  $I_C$  are the principal moments of inertia of the monohydrated complex while  $I_a$ ,  $I_b$  and  $I_c$  are those of the monomer form,  $\mu$  is the reduced mass considering a pseudo-diatomic model and  $R_{CM}$  is the distance between the centers of mass of the monomer and the water molecule in the complex.  $R_{CM}$  could be taken from the geometrical predictions or calculated by the equation:

$$R_{CM}^2 = \frac{(I_c - I_c)}{\mu} \quad (2)$$

**Figure S1.** CP-FTMW, 2-8 GHz, rotational spectrum of SA and its water complexes (upper figure). At the bottom, a zoom of the spectrum from 6-8 GHz is shown, where the intensities of the most intense transitions of the SA-I and SA-w (SA-I-w-a) species can be compared. The a) excerpt shows the  $4_{0,4} \leftarrow 3_{1,3}$  transition for the SA-I  $^{13}\text{C}$  isotopologues. (See Figure 3 for the atom labelling).

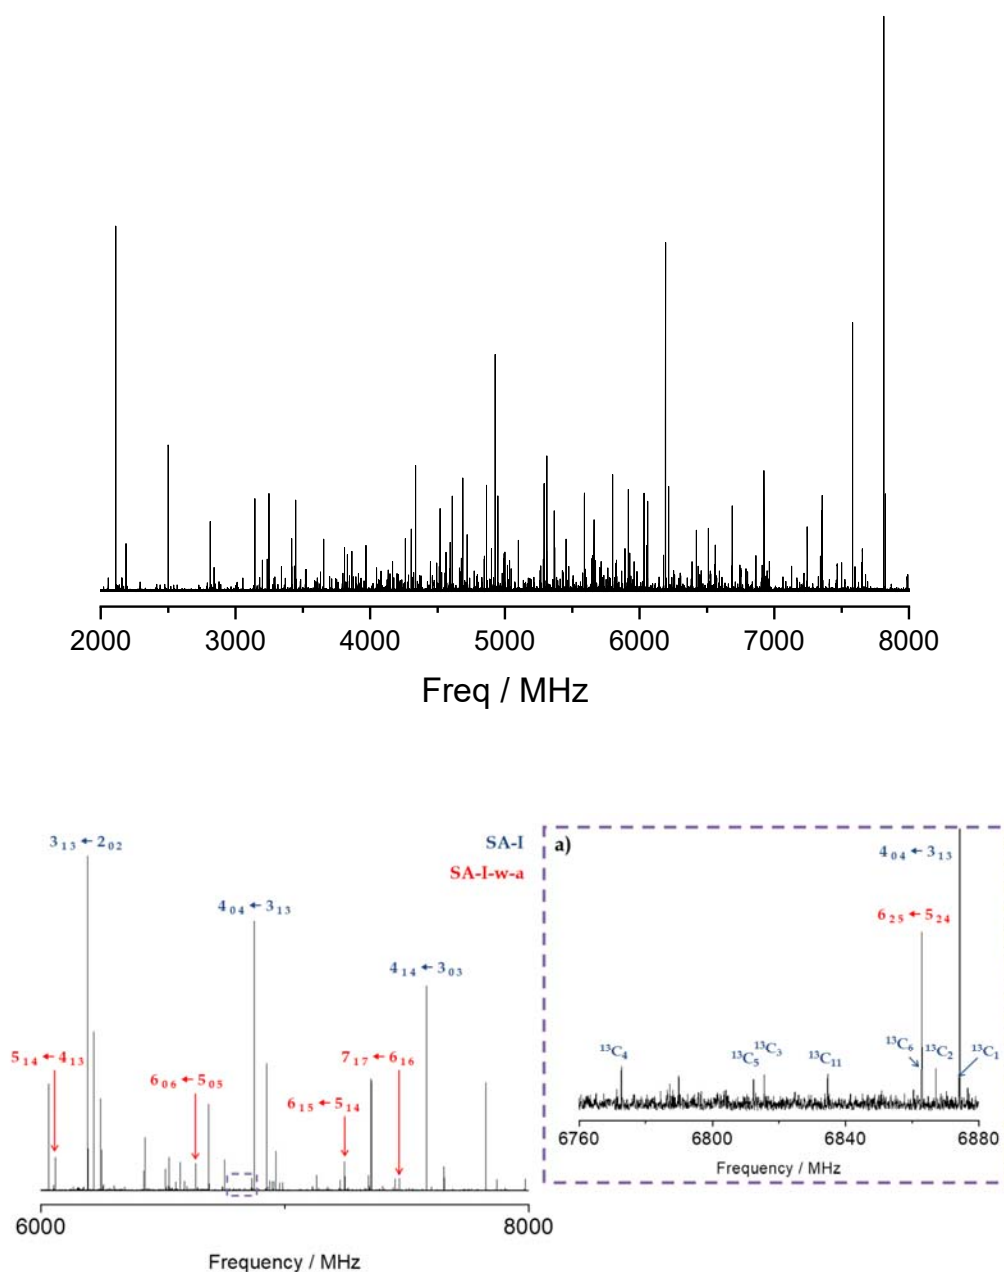

**Figure S2.** Stable conformers predicted for salicylic acid monomer. Their corresponding parameters are given in Table S1. Relative energies to conformer I are predicted at B3LYP-D3-6-311++G(d,p) level.

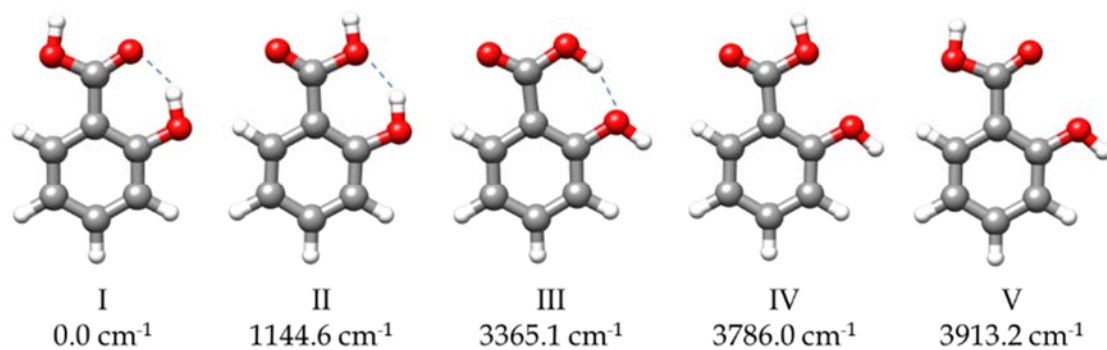

**Figure S3.** Stable conformers predicted for the monohydrated complex of salicylic acid. Their corresponding parameters are given in Table S2. Relative energies to conformer I-w-a are predicted at B3LYP-D3-6-311++G(d,p) level.

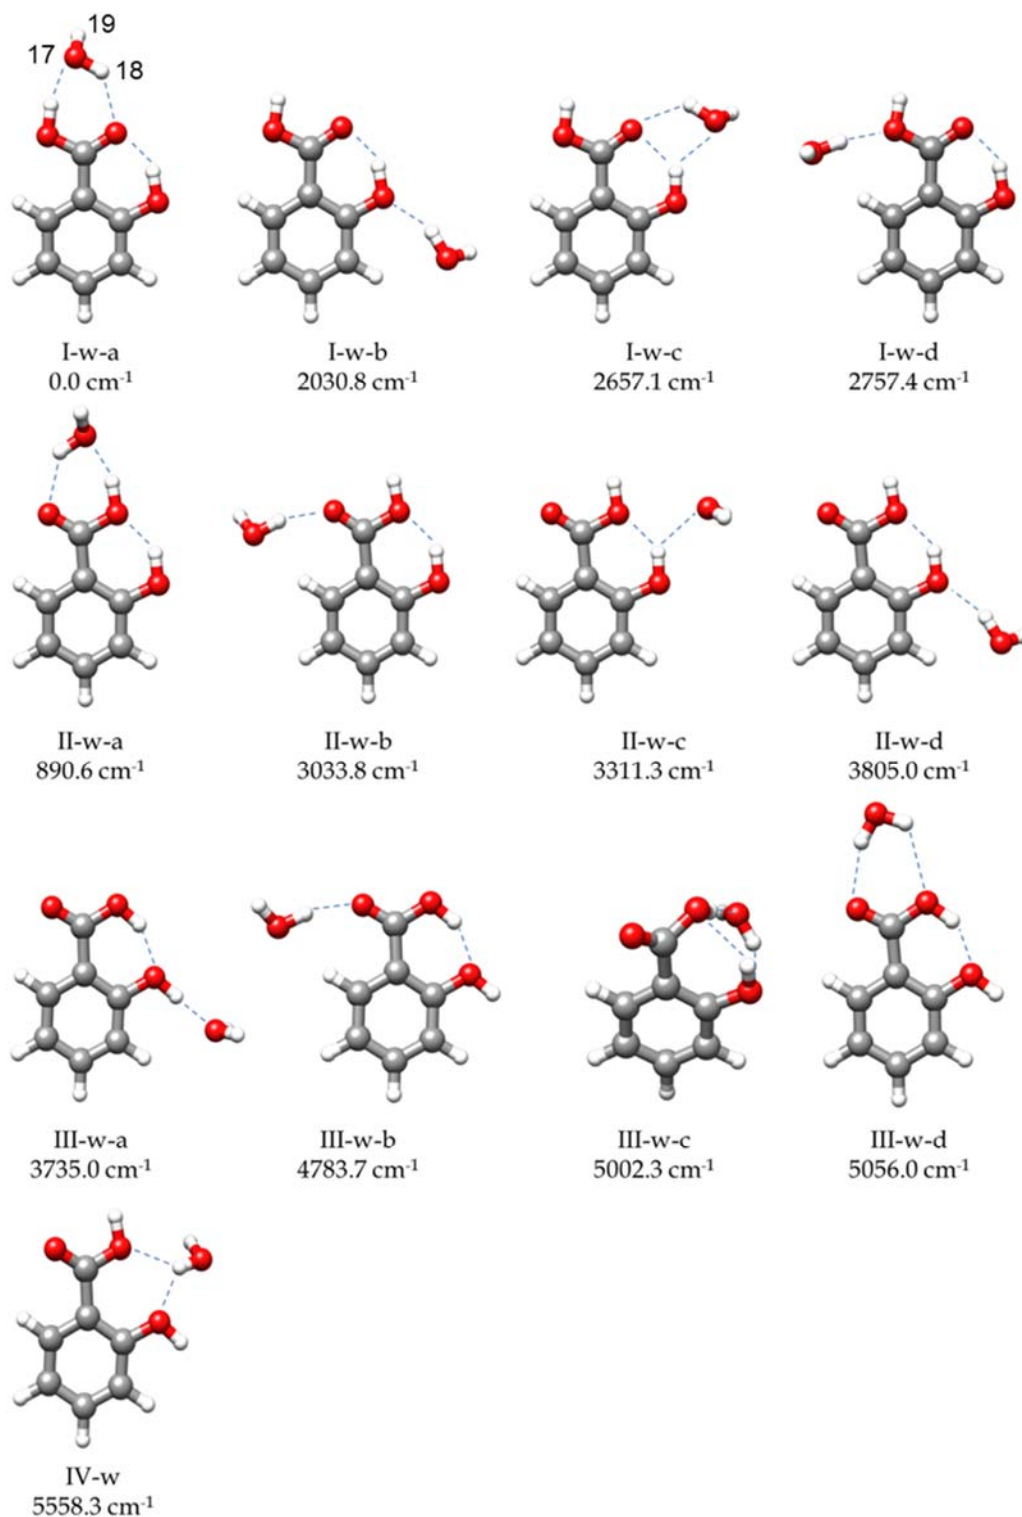

**Figure S4.** Stable conformers predicted for the dihydrated complex of salicylic acid. The parameters for the first-row conformers are given in Table S3. Relative energies to conformer I-w<sub>2</sub>-a are predicted at B3LYP-D3-6-311++G(d,p) level.

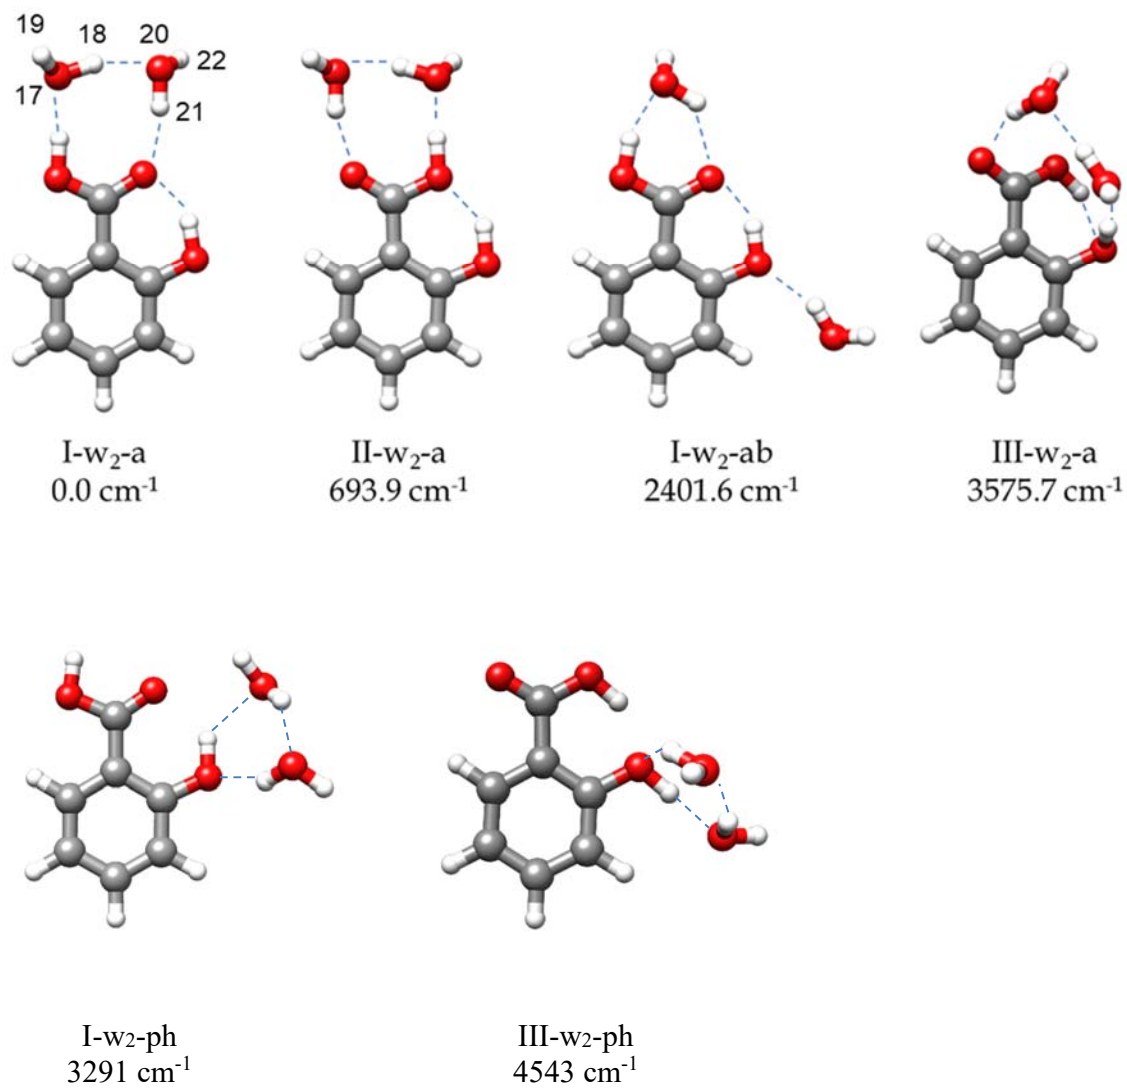

**Figure S5.** Stable conformers predicted for the trihydrated complex of salicylic acid. The parameters are given in Table S4. Relative energies to conformer I-w<sub>3</sub>-a are predicted at B3LYP-D3/6-311++G(d,p) level.

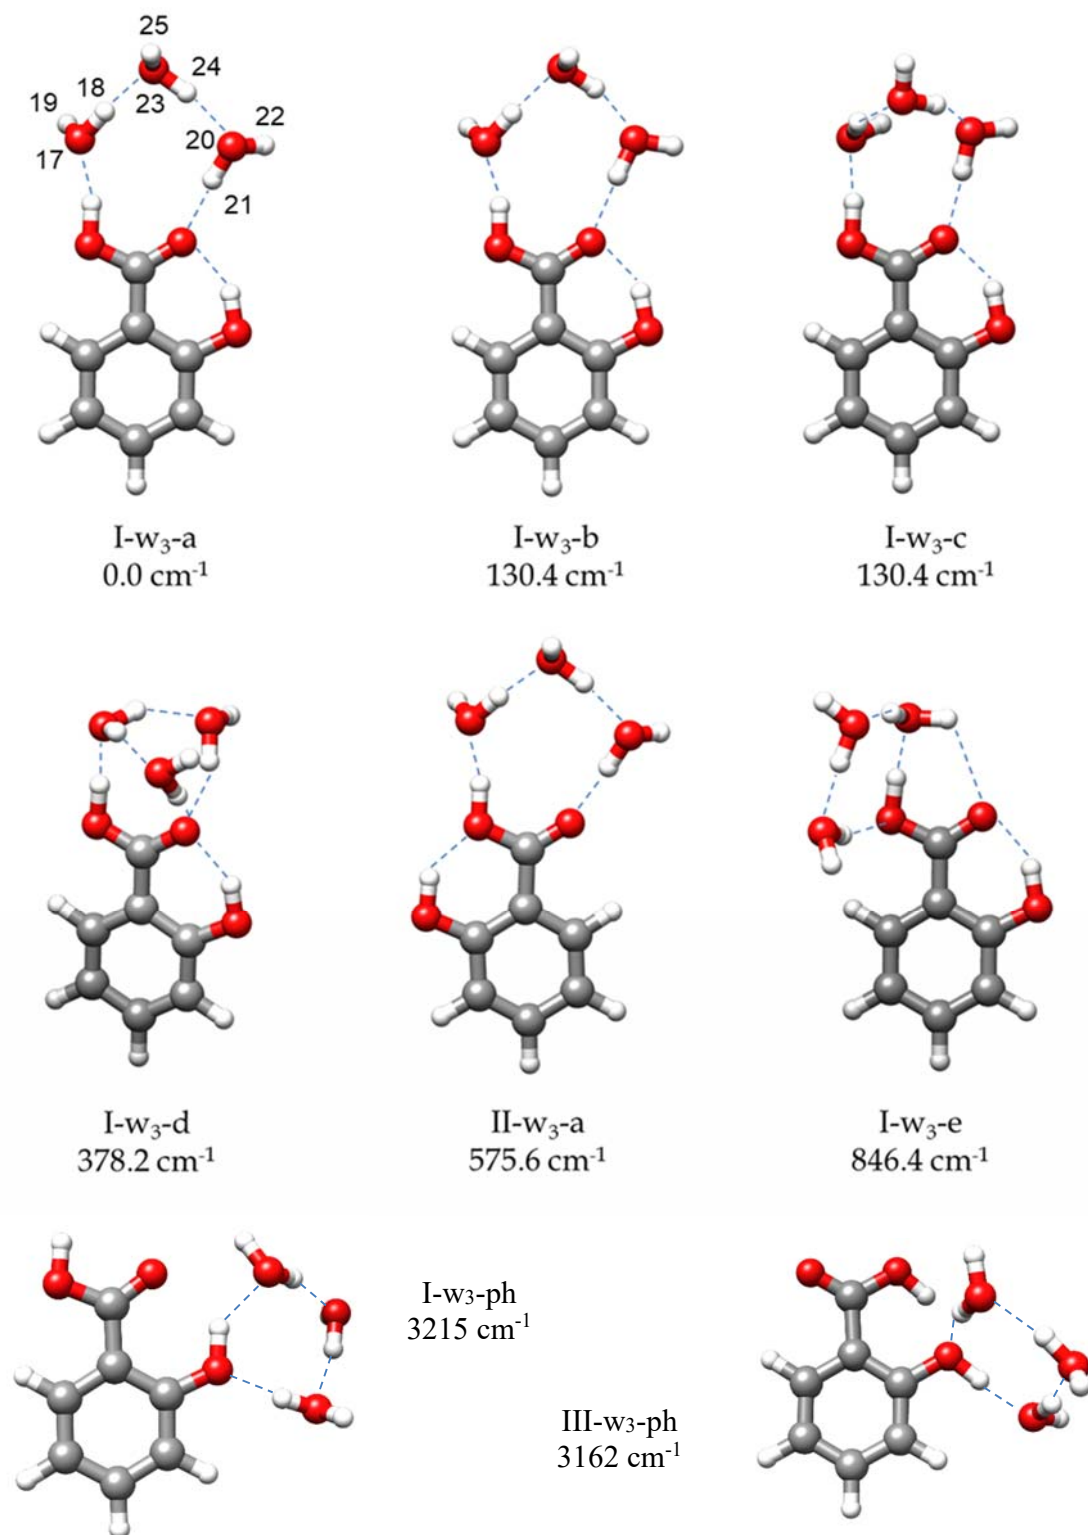



**Figure S6.** Stable conformers predicted for the tetrahydrated complex of salicylic acid. Their corresponding parameters are given in Table S 5. Relative energies to conformer I-w<sub>4</sub>-a are predicted at B3LYP-D3/6-311++G(d,p) level.

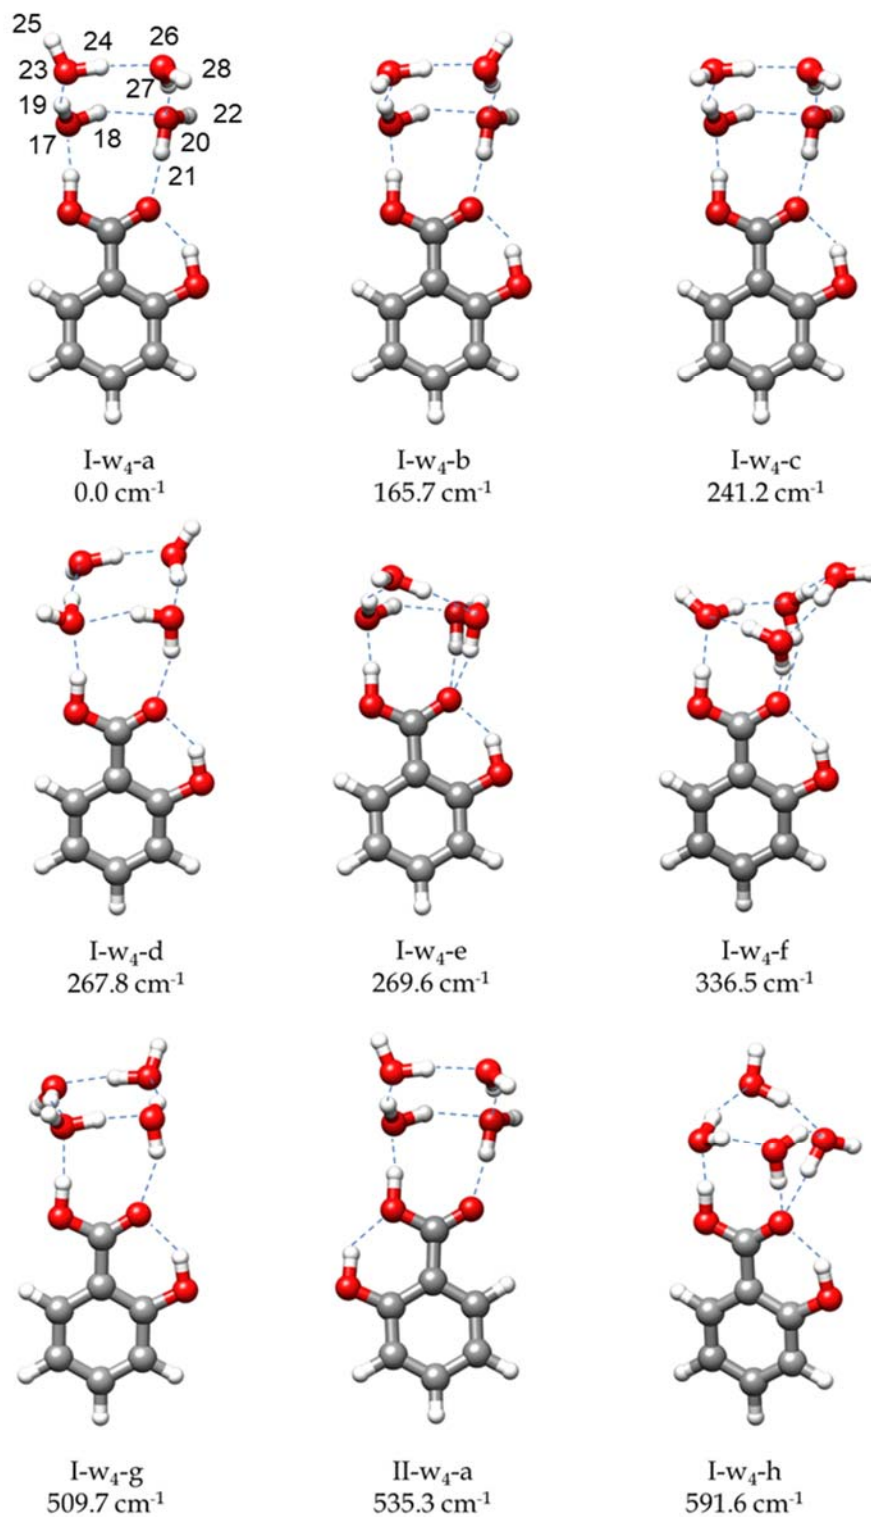

**Figure S7.** a) Bond Critical Points (BCPs) and Ring Critical Points (RCPs) in yellow, and the Bond Paths (BPs) in orange calculated at B3LYP-D3/6-311++G(d,p) level for the conformer I of salicylic acid from the Quantum Theory of “atoms in molecules” (QTAIM) analyses. b) Results of Non-Covalent Interaction (NCI) analysis. Each point in the scatter graph corresponds to a grid point in 3D space and represents the reduced density gradient (RDG) vs.  $\text{sign}[\lambda_2(r)]\rho(r)$ . The blue-green spikes in the left (negative side) corresponds to attractive interactions, while those orange-red spikes in the right (positive side) corresponds to negative interactions. The points corresponding to low RDG values represent weak interactions. Those with  $\text{RDG} < 0.5$  a.u. are represented by the isosurface.

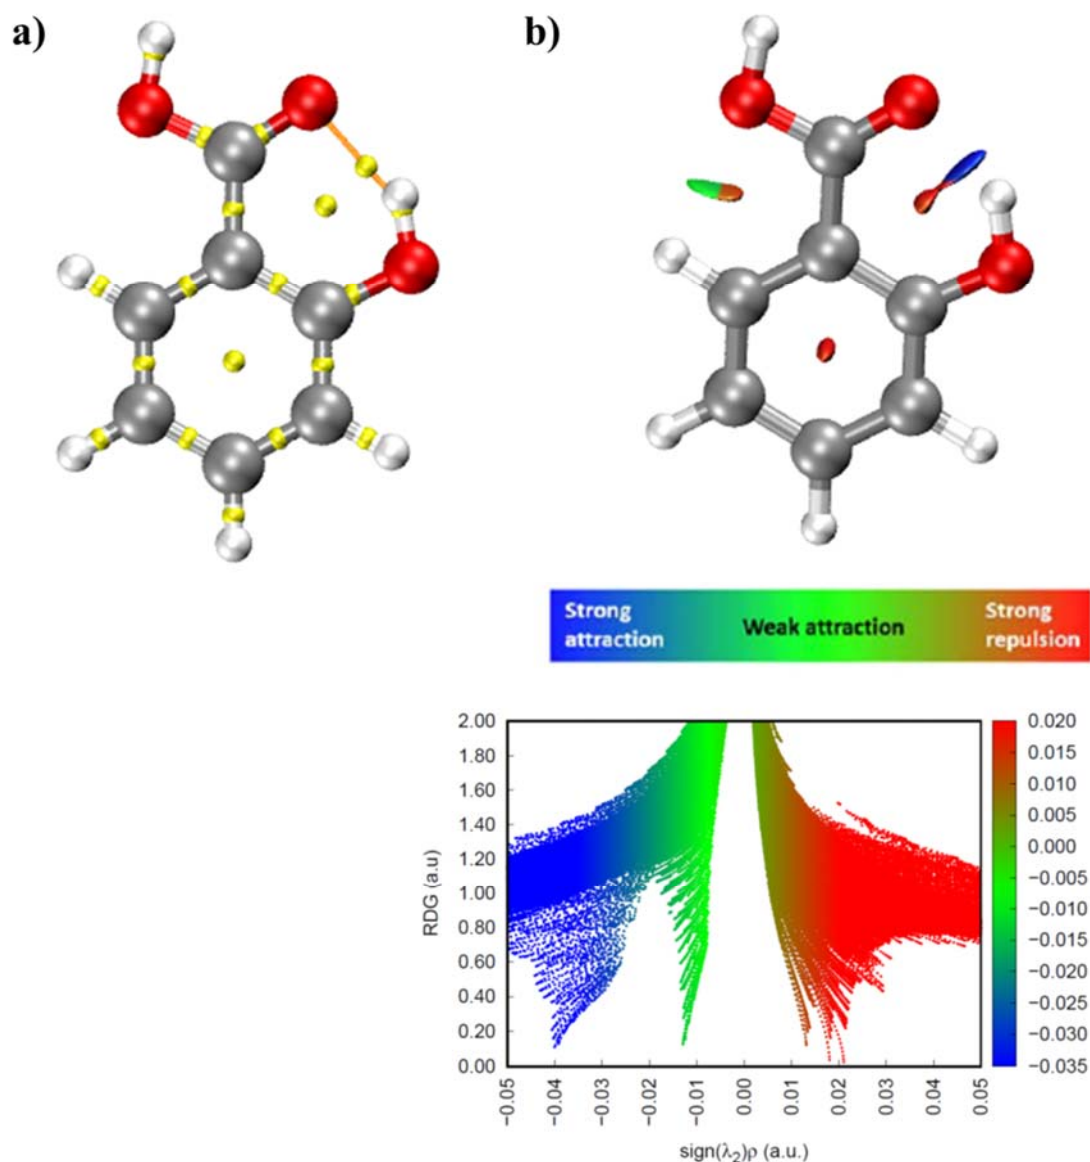

**Figure S8.** a) Bond Critical Points (BCPs) and Ring Critical Points (RCPs) in yellow, and the Bond Paths (BPs) in orange calculated at B3LYP-D3/6-311++G(d,p) level for the conformer I-w-a of salicylic acid – water complex from the Quantum Theory of “atoms in molecules” (QTAIM) analyses. b) Results of Non-Covalent Interaction (NCI) analysis. Each point in the scatter graph corresponds to a grid point in 3D space and represents the reduced density gradient (RDG) vs.  $\text{sign}[\lambda_2(r)]\rho(r)$ . The blue-green spikes in the left (negative side) corresponds to attractive interactions, while those orange-red spikes in the right (positive side) corresponds to negative interactions. The points corresponding to low RDG values represent weak interactions. Those with  $\text{RDG} < 0.5$  a.u. are represented by the isosurface.

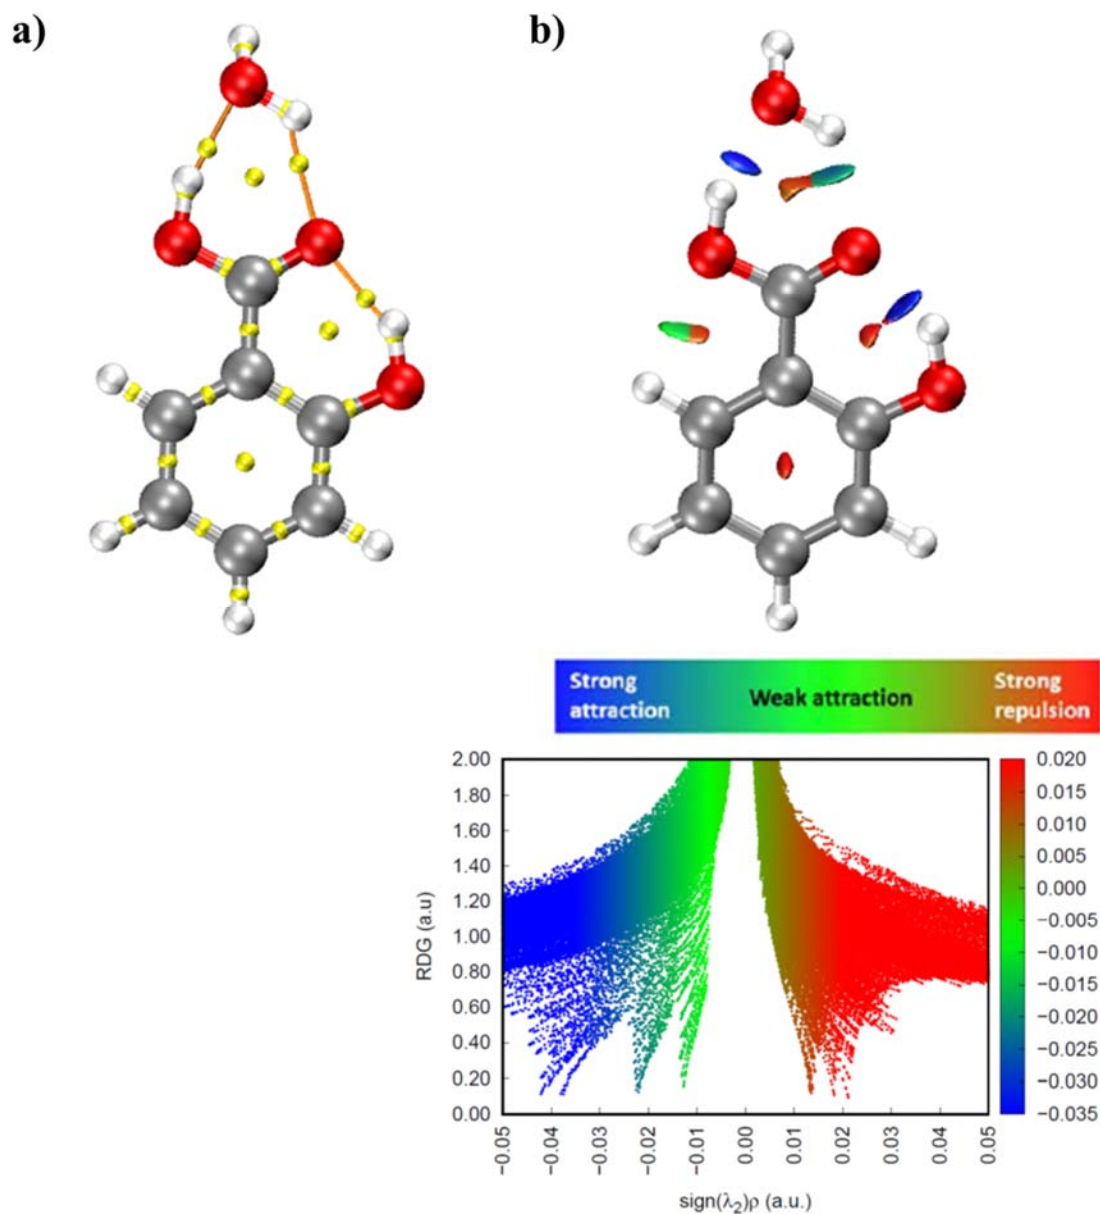

**Figure S9.** a) Bond Critical Points (BCPs) and Ring Critical Points (RCPs) in yellow, and the Bond Paths (BPs) in orange calculated at B3LYP-D3/6-311++G(d,p) level for the conformer I-w2-a of salicylic acid – water<sub>2</sub> complex from the Quantum Theory of “atoms in molecules” (QTAIM) analyses. b) Results of Non-Covalent Interaction (NCI) analysis. Each point in the scatter graph corresponds to a grid point in 3D space and represents the reduced density gradient (RDG) vs.  $\text{sign}[\lambda_2(r)]\rho(r)$ . The blue-green spikes in the left (negative side) corresponds to attractive interactions, while those orange-red spikes in the right (positive side) corresponds to negative interactions. The points corresponding to low RDG values represent weak interactions. Those with  $\text{RDG} < 0.5$  a.u. are represented by the isosurface.

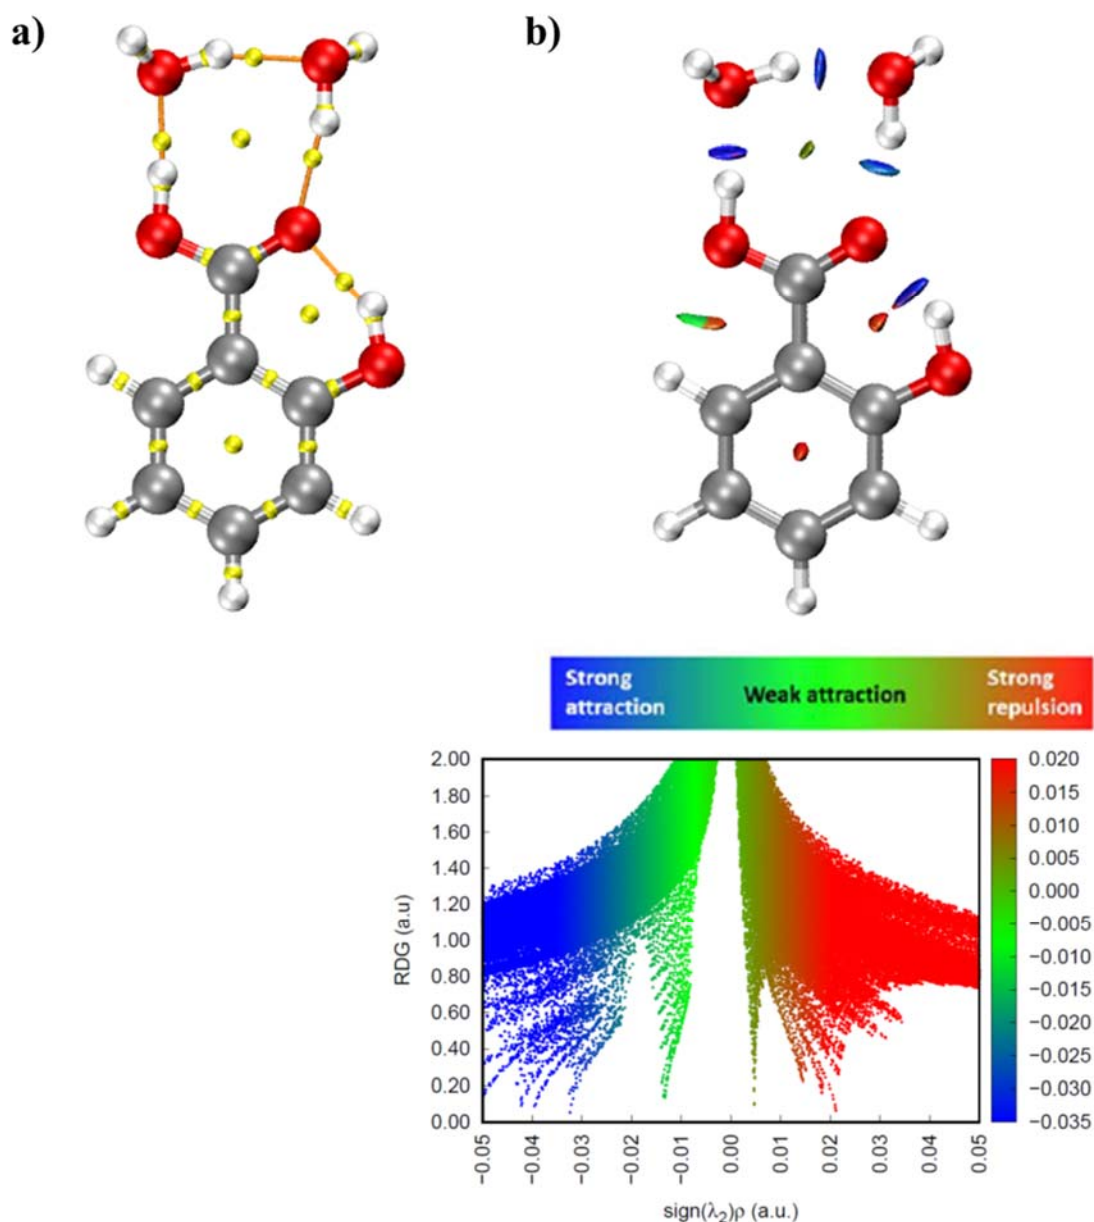

**Figure S10.** a) Bond Critical Points (BCPs) and Ring Critical Points (RCPs) in yellow, and the Bond Paths (BPs) in orange calculated at B3LYP-D3/6-311++G(d,p) level for the conformer I-w<sub>3</sub>-a of salicylic acid – water<sub>3</sub> complex from the Quantum Theory of “atoms in molecules” (QTAIM) analyses. b) Results of Non-Covalent Interaction (NCI) analysis. Each point in the scatter graph corresponds to a grid point in 3D space and represents the reduced density gradient (RDG) vs.  $\text{sign}[\lambda_2(r)]\rho(r)$ . The blue-green spikes in the left (negative side) corresponds to attractive interactions, while those orange-red spikes in the right (positive side) corresponds to negative interactions. The points corresponding to low RDG values represent weak interactions. Those with  $\text{RDG} < 0.5$  a.u. are represented by the isosurface.

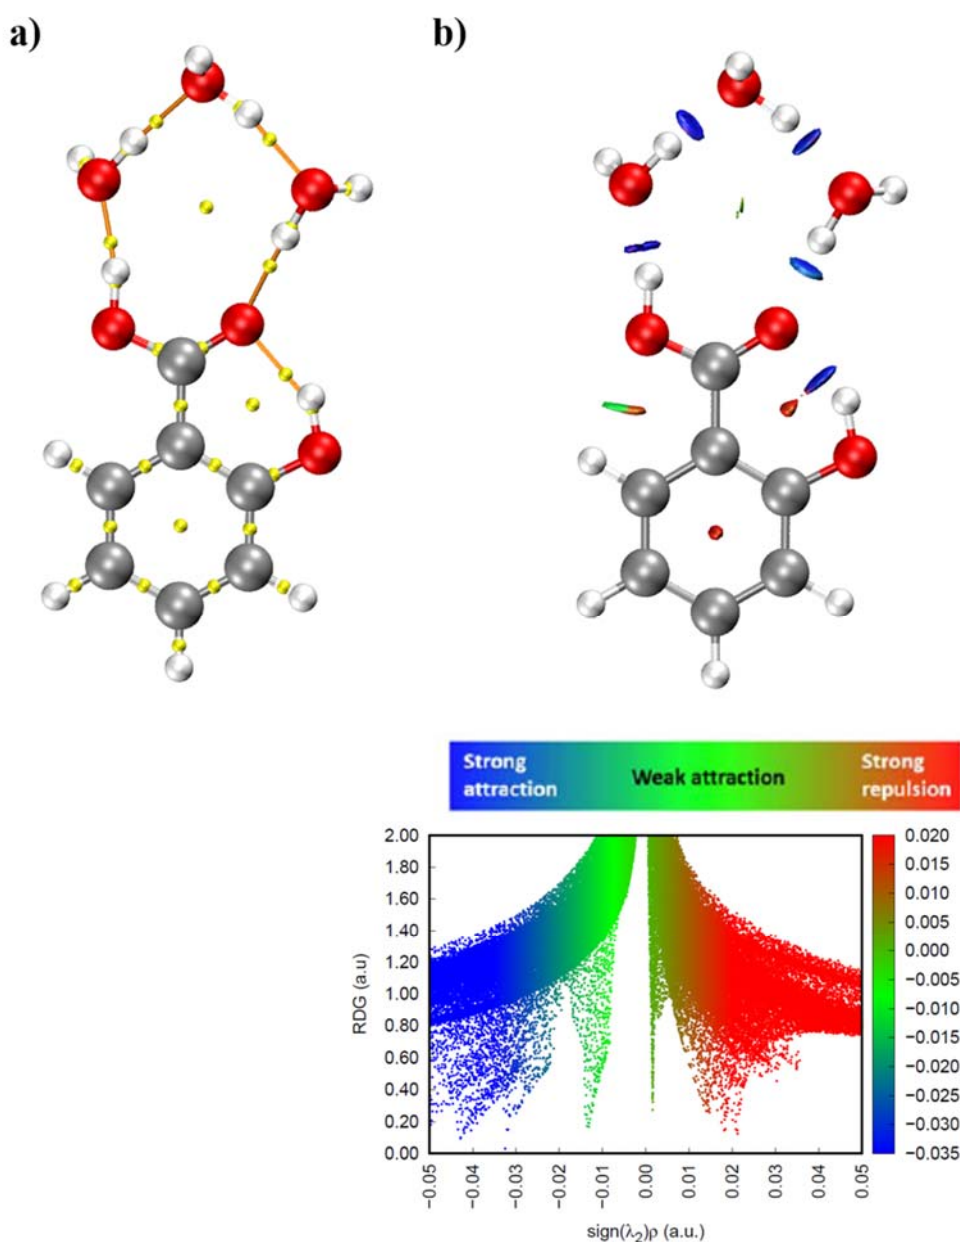



**Figure S11.** a) Bond Critical Points (BCPs) and Ring Critical Points (RCPs) in yellow, and the Bond Paths (BPs) in orange calculated at B3LYP-D3/6-311++G(d,p) level for the conformer I-w4-a of salicylic acid – water<sub>4</sub> complex from the Quantum Theory of “atoms in molecules” (QTAIM) analyses. b) Results of Non-Covalent Interaction (NCI) analysis. Each point in the scatter graph corresponds to a grid point in 3D space and represents the reduced density gradient (RDG) vs.  $\text{sign}[\lambda_2(r)]\rho(r)$ . The blue-green spikes in the left (negative side) corresponds to attractive interactions, while those orange-red spikes in the right (positive side) corresponds to negative interactions. The points corresponding to low RDG values represent weak interactions. Those with  $\text{RDG} < 0.5$  a.u. are represented by the isosurface. The hydrogen bond between the  $\text{O-H}\cdots\text{Ow}_1$  presents a  $\text{sign}[\lambda_2(r)]\rho(r)$  value close to  $-0.007$  a.u., associated to a strong interaction.

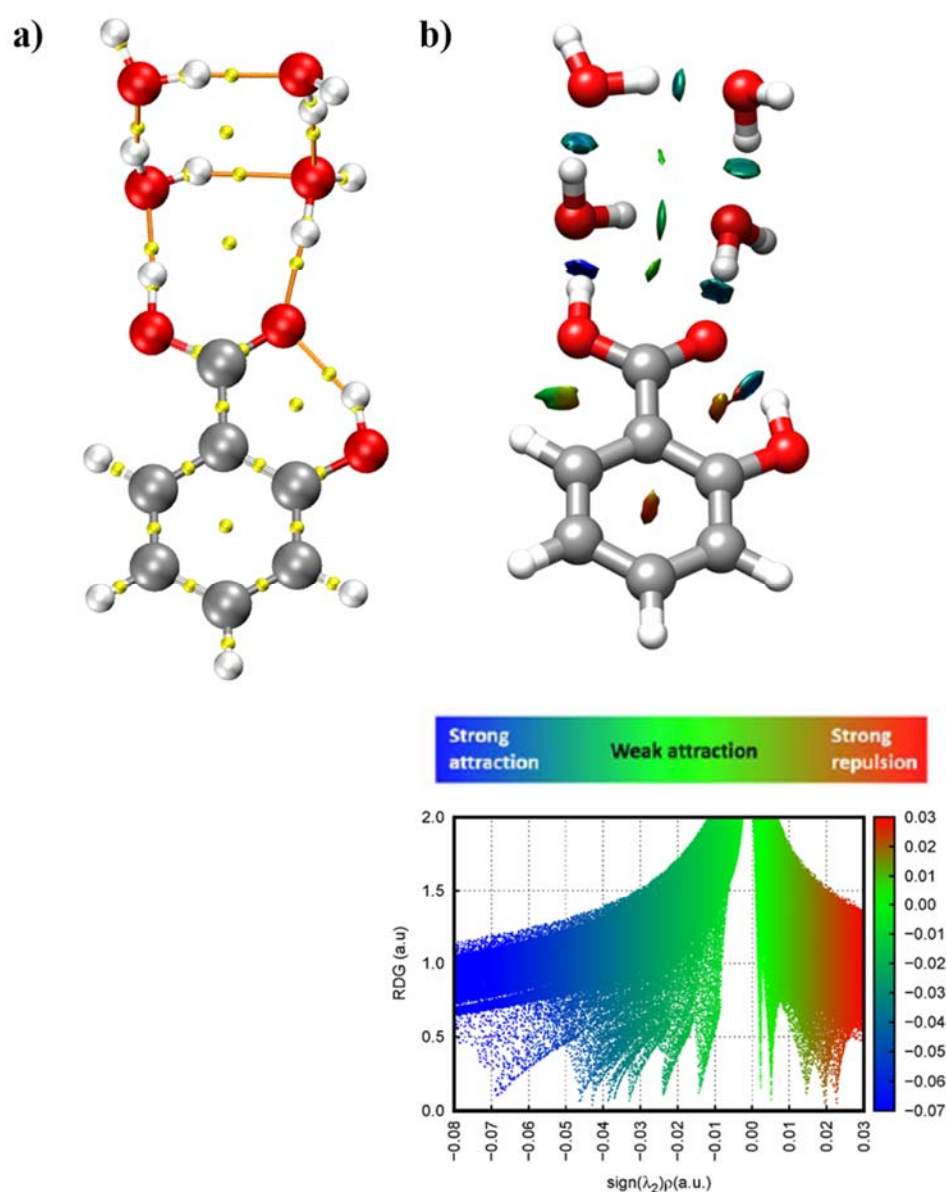

**Figure S12.** Possible path for inversion for the conformer I-w<sub>3</sub>-a. It was calculated in two steps by scanning successively the flipping angles  $\alpha$  and  $\beta$ . Through this path small potential energy barriers allow the interconversion between two equivalent forms. Calculations have been done at B3LYP-D3/6-311++G(d,p) level of theory.

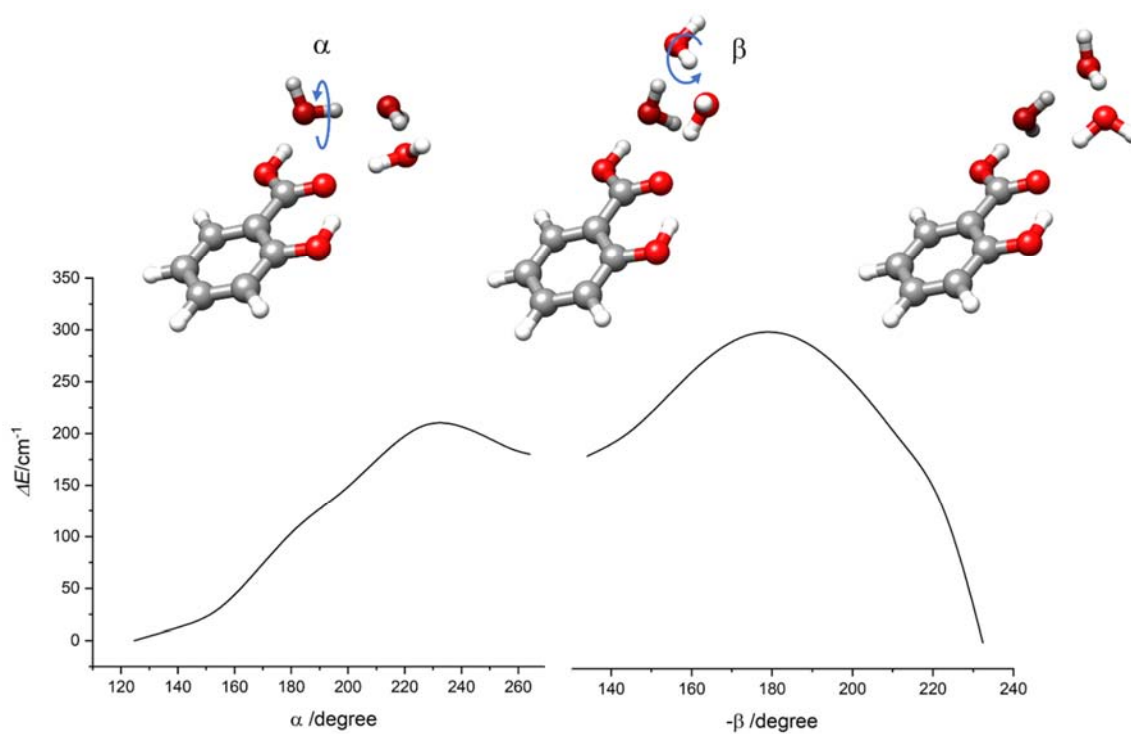

**Table S1.** Rotational parameters predicted from B3LYP-D3/6-311++G(d,p) level of theory for the most stable species of salicylic acid monomer.

| Parameter <sup>a</sup>                    | I                | II      | III     | IV      | V       |
|-------------------------------------------|------------------|---------|---------|---------|---------|
| <i>A</i> /MHz                             | 2336.06          | 2329.26 | 2322.93 | 2318.42 | 2295.69 |
| <i>B</i> /MHz                             | 1221.82          | 1211.10 | 1208.39 | 1205.87 | 1210.29 |
| <i>C</i> /MHz                             | 802.23           | 796.80  | 795.29  | 793.85  | 792.49  |
| <i>P<sub>cc</sub></i> /uÅ <sup>2</sup>    | 0.00             | 0.00    | 0.16    | 0.23    | 0.00    |
| $\mu_a$ /D                                | -0.4             | -0.1    | 5.7     | 2.8     | 2.4     |
| $\mu_b$ /D                                | 2.2              | -0.7    | 3.7     | 2.2     | -1.9    |
| $\mu_c$ /D                                | 0.0              | 0.0     | 0.3     | 0.1     | 0.0     |
| $\Delta E_{\text{DFT}}$ /cm <sup>-1</sup> | 0.0 <sup>b</sup> | 1144.6  | 3365.1  | 3786.0  | 3913.2  |

<sup>a</sup> *A*, *B* and *C* are the rotational constants. *P<sub>cc</sub>* is the planar moment of inertia, derived from  $P_{cc}=(I_a+I_b-I_c)/2$ .  $\mu_a$ ,  $\mu_b$  and  $\mu_c$  are the components of the electric dipole moment.  $\Delta E$  is the energy relative to predicted global minimum conformer.

<sup>b</sup> Absolute energy is -496.2168409 E<sub>h</sub>.



**Table S2.** Rotational parameters predicted at B3LYP-D3/6-311++G(d,p) level of theory for the stable conformers of the monohydrated complex of the salicylic acid.

| Parameter <sup>a</sup>                  | I-w-a            | II-w-a  | I-w-b   | I-w-c   | I-w-d   |
|-----------------------------------------|------------------|---------|---------|---------|---------|
| <i>A</i> /MHz                           | 2313.15          | 2311.93 | 1399.25 | 1581.85 | 1335.12 |
| <i>B</i> /MHz                           | 648.76           | 647.51  | 821.10  | 805.29  | 870.84  |
| <i>C</i> /MHz                           | 507.09           | 506.29  | 517.80  | 534.31  | 537.91  |
| <i>P</i> <sub>cc</sub> /uÅ <sup>2</sup> | 0.42             | 0.44    | 0.33    | 0.60    | 9.67    |
| $\mu_a/D$                               | -0.6             | -0.7    | -2.5    | 0.4     | 0.3     |
| $\mu_b/D$                               | 1.0              | -0.6    | 0.5     | 2.0     | 0.6     |
| $\mu_c/D$                               | -1.2             | 1.2     | 0.9     | 1.3     | 1.1     |
| $\Delta E_{\text{DFT}}/\text{cm}^{-1}$  | 0.0 <sup>b</sup> | 890.6   | 2030.8  | 2657.1  | 2757.4  |
|                                         | II-w-b           | II-w-c  | III-w-a | II-w-d  | III-w-b |
| <i>A</i> /MHz                           | 1355.92          | 1379.21 | 1223.98 | 1527.73 | 1348.17 |
| <i>B</i> /MHz                           | 868.96           | 816.33  | 842.59  | 790.54  | 878.31  |
| <i>C</i> /MHz                           | 529.99           | 513.19  | 516.33  | 522.23  | 532.79  |
| <i>P</i> <sub>cc</sub> /uÅ <sup>2</sup> | 0.37             | 0.37    | 16.95   | 1.18    | 0.85    |
| $\mu_a/D$                               | -0.6             | 0.4     | 9.4     | 1.7     | 6.2     |
| $\mu_b/D$                               | 1.8              | -1.3    | 1.7     | -2.8    | -0.5    |
| $\mu_c/D$                               | 1.0              | -1.1    | 0.2     | 0.0     | 1.0     |
| $\Delta E_{\text{DFT}}/\text{cm}^{-1}$  | 3033.8           | 3311.3  | 3735.0  | 3805.0  | 4783.7  |
|                                         | III-w-c          | III-w-d | IV-w    |         |         |
| <i>A</i> /MHz                           | 1361.27          | 2276.47 | 1425.13 |         |         |
| <i>B</i> /MHz                           | 968.06           | 605.99  | 836.89  |         |         |
| <i>C</i> /MHz                           | 688.29           | 478.71  | 549.88  |         |         |
| <i>P</i> <sub>cc</sub> /uÅ <sup>2</sup> | 79.53            | 0.13    | 19.71   |         |         |
| $\mu_a/D$                               | 3.3              | 9.3     | 2.3     |         |         |
| $\mu_b/D$                               | -4.0             | 3.6     | -1.6    |         |         |
| $\mu_c/D$                               | 2.3              | 0.2     | 0.8     |         |         |
| $\Delta E_{\text{DFT}}/\text{cm}^{-1}$  | 5002.3           | 5056.0  | 5558.3  |         |         |

<sup>a</sup> See footnote of Table S1.

<sup>b</sup> Absolute energy is -572.6949094 E<sub>h</sub>.

**Table S3.** Rotational parameters predicted at B3LYP-D3/6-311++G(d,p) level of theory for the stable conformers of the dihydrated complex of the salicylic acid.

| Parameter <sup>a</sup>                 | I-2wa            | II-2wa  | I-2wab  | III-2wa |
|----------------------------------------|------------------|---------|---------|---------|
| $A/\text{MHz}$                         | 1780.40          | 1759.99 | 1164.04 | 1385.97 |
| $B/\text{MHz}$                         | 453.67           | 450.32  | 526.32  | 613.62  |
| $C/\text{MHz}$                         | 362.04           | 359.17  | 362.96  | 504.06  |
| $P_{\text{cc}}/\text{u}\text{\AA}^2$   | 0.96             | 1.17    | 0.99    | 92.81   |
| $\mu_a/\text{D}$                       | -0.5             | 0.8     | -2.6    | -1.4    |
| $\mu_b/\text{D}$                       | -0.9             | -0.8    | 0.2     | 1.2     |
| $\mu_c/\text{D}$                       | 0.0              | 0.0     | 2.2     | -1.1    |
| $\Delta E_{\text{DFT}}/\text{cm}^{-1}$ | 0.0 <sup>b</sup> | 693.9   | 2401.6  | 3571.7  |

<sup>a</sup> See footnote of Table S1.

<sup>b</sup> Absolute energy is -649.1747737 E<sub>h</sub>.

**Table S4.** Rotational parameters predicted at B3LYP-D3/6-311++G(d,p) level of theory for the stable conformers of the trihydrated complex of the salicylic acid.

| Parameter <sup>a</sup>              | I-w <sub>3</sub> -a | I-w <sub>3</sub> -b  | I-w <sub>3</sub> -c |
|-------------------------------------|---------------------|----------------------|---------------------|
| A/MHz                               | 1412.10             | 1436.05              | 1421.44             |
| B/MHz                               | 319.03              | 317.16               | 327.39              |
| C/MHz                               | 263.04              | 262.98               | 284.18              |
| P <sub>cc</sub> /uÅ <sup>2</sup>    | 10.33               | 11.82                | 60.41               |
| μ <sub>a</sub> /D                   | 0.6                 | -0.1                 | -1.5                |
| μ <sub>b</sub> /D                   | 0.6                 | 0.0                  | 1.3                 |
| μ <sub>c</sub> /D                   | 0.6                 | 0.3                  | -0.1                |
| ΔE <sub>DFT</sub> /cm <sup>-1</sup> | 0.0 <sup>b</sup>    | 130.4                | 130.4               |
|                                     | I-w <sub>3</sub> -d | II-w <sub>3</sub> -a | I-w <sub>3</sub> -e |
| A/MHz                               | 1299.61             | 1352.11              | 1155.81             |
| B/MHz                               | 372.95              | 320.69               | 379.40              |
| C/MHz                               | 335.34              | 261.57               | 318.21              |
| P <sub>cc</sub> /uÅ <sup>2</sup>    | 118.44              | 8.79                 | 90.55               |
| μ <sub>a</sub> /D                   | 1.1                 | 0.9                  | -0.1                |
| μ <sub>b</sub> /D                   | -1.4                | 1.2                  | 3.0                 |
| μ <sub>c</sub> /D                   | 1.2                 | 0.8                  | 1.0                 |
| ΔE <sub>DFT</sub> /cm <sup>-1</sup> | 378.2               | 575.6                | 846.4               |

<sup>a</sup> See footnote of Table S1.

<sup>b</sup> Absolute energy is -725.6502119 E<sub>h</sub>.

**Table S5.** Rotational parameters predicted at B3LYP-D3/6-311++G(d,p) level of theory for the stable conformers of the tetrahydrated complex of the salicylic acid.

| Parameter <sup>a</sup>                 | I-w <sub>4</sub> -a | I-w <sub>4</sub> -b  | I-w <sub>4</sub> -c |
|----------------------------------------|---------------------|----------------------|---------------------|
| A/MHz                                  | 1073.10             | 1066.29              | 1059.87             |
| B/MHz                                  | 250.60              | 251.56               | 251.90              |
| C/MHz                                  | 222.98              | 224.02               | 224.40              |
| $P_{cc}/\text{u}\text{\AA}^2$          | 110.58              | 113.49               | 115.48              |
| $\mu_a/D$                              | -0.8                | -0.7                 | 0.8                 |
| $\mu_b/D$                              | 1.4                 | 1.6                  | 1.3                 |
| $\mu_c/D$                              | 0.2                 | 0.4                  | 1.6                 |
| $\Delta E_{\text{DFT}}/\text{cm}^{-1}$ | 0.0 <sup>b</sup>    | 165.7                | 241.2               |
|                                        | I-w <sub>4</sub> -d | I-w <sub>4</sub> -e  | I-w <sub>4</sub> -f |
| A/MHz                                  | 1093.11             | 1028.22              | 1137.26             |
| B/MHz                                  | 243.76              | 289.50               | 276.83              |
| C/MHz                                  | 217.21              | 261.57               | 244.94              |
| $P_{cc}/\text{u}\text{\AA}^2$          | 104.46              | 152.55               | 130.35              |
| $\mu_a/D$                              | 0.6                 | -1.4                 | -1.3                |
| $\mu_b/D$                              | -3.1                | 0.1                  | -1.5                |
| $\mu_c/D$                              | 0.5                 | 0.5                  | 0.1                 |
| $\Delta E_{\text{DFT}}/\text{cm}^{-1}$ | 267.8               | 269.6                | 336.5               |
|                                        | I-w <sub>4</sub> -g | II-w <sub>4</sub> -a | I-w <sub>4</sub> -h |
| A/MHz                                  | 1045.06             | 1062.27              | 1053.34             |
| B/MHz                                  | 251.42              | 251.68               | 288.32              |
| C/MHz                                  | 227.64              | 222.95               | 260.13              |
| $P_{cc}/\text{u}\text{\AA}^2$          | 136.80              | 112.50               | 144.92              |
| $\mu_a/D$                              | 0.4                 | 1.1                  | -0.1                |
| $\mu_b/D$                              | -3.1                | 3.0                  | 1.6                 |
| $\mu_c/D$                              | 0.3                 | -0.2                 | 2.7                 |
| $\Delta E_{\text{DFT}}/\text{cm}^{-1}$ | 509.7               | 535.3                | 591.6               |

<sup>a</sup> See footnote of Table S1.

<sup>b</sup> Absolute energy is -802.1296231 E<sub>h</sub>.

**Table S6.** Experimental rotational parameters obtained for the observed  $^{13}\text{C}$  and D isotopologues of conformer I of salicylic acid. The D species were also fit with the transitions of the millimetre-wave previous study [11]. The centrifugal distortion constants for all the isotopologues were fixed to the parent values. See Figure 3 or Table S9 for the atom labelling.

| <b>Fitted Param.<sup>a</sup></b>     | $^{13}\text{C}_1$          | $^{13}\text{C}_2$    | $^{13}\text{C}_3$               | $^{13}\text{C}_4$ | $^{13}\text{C}_5$ |
|--------------------------------------|----------------------------|----------------------|---------------------------------|-------------------|-------------------|
| <i>A</i> /MHz                        | 2339.6062(13) <sup>b</sup> | 2330.4567(20)        | 2330.9608(16)                   | 2339.51690(98)    | 2317.03428(97)    |
| <i>B</i> /MHz                        | 1223.74657(95)             | 1222.93965(80)       | 1212.7043(10)                   | 1203.85694(74)    | 1212.8771(11)     |
| <i>C</i> /MHz                        | 803.81184(76)              | 802.37992(76)        | 798.02404(70)                   | 795.17425(46)     | 796.45755(66)     |
| $P_{\text{cc}}/\text{u}\text{\AA}^2$ | 0.12957(52)                | 0.12884(53)          | 0.13036(52)                     | 0.13043(36)       | 0.12946(50)       |
| N                                    | 11                         | 7                    | 10                              | 10                | 13                |
| $\sigma$ /kHz                        | 9.5                        | 7.4                  | 8.6                             | 5.5               | 8.1               |
|                                      | $^{13}\text{C}_6$          | $^{13}\text{C}_{11}$ |                                 |                   |                   |
| <i>A</i> /MHz                        | 2317.03232(94)             | 2339.7700(13)        |                                 |                   |                   |
| <i>B</i> /MHz                        | 1222.93849(56)             | 1215.9562(12)        |                                 |                   |                   |
| <i>C</i> /MHz                        | 800.78462(60)              | 800.46268(82)        |                                 |                   |                   |
| $P_{\text{cc}}/\text{u}\text{\AA}^2$ | 0.12987(38)                | 0.12963(59)          |                                 |                   |                   |
| N                                    | 13                         | 10                   |                                 |                   |                   |
| $\sigma$ /kHz                        | 6.9                        | 8.4                  |                                 |                   |                   |
|                                      | $\text{D}_{15}$            | $\text{D}_{16}$      | $\text{D}_{15} - \text{D}_{16}$ |                   |                   |
| <i>A</i> /MHz                        | 2323.77041(21)             | 2297.80023(28)       | 2280.69331(29)                  |                   |                   |
| <i>B</i> /MHz                        | 1194.46860(18)             | 1220.49531(35)       | 1191.70809(50)                  |                   |                   |
| <i>C</i> /MHz                        | 798.26545(21)              | 797.43514(34)        | 783.04691(44)                   |                   |                   |
| $P_{\text{cc}}/\text{u}\text{\AA}^2$ | 0.13307(13)                | 0.13085(21)          | 0.13446(28)                     |                   |                   |
| N                                    | 53 <sup>c</sup>            | 52 <sup>c</sup>      | 43 <sup>c</sup>                 |                   |                   |
| $\sigma$ /kHz                        | 15.4                       | 21.5                 | 19.4                            |                   |                   |

<sup>a</sup> *A*, *B* and *C* are the rotational constants.  $P_{\text{cc}}$  is the planar moment of inertia, derived from  $P_{\text{cc}} = (I_a + I_b - I_c)/2$ .  $\Delta_J$ ,  $\Delta_{JK}$ ,  $\Delta_K$ ,  $\delta_J$  and  $\delta_K$  are the quartic centrifugal distortion constants. N is the number of rotational transitions fitted.  $\sigma$  is the rms deviations of the fit.

<sup>b</sup> Standard error is given in parentheses in units of the last digit.

<sup>c</sup> Fit done with the transition measured in the previous work [11].

**Table S7.** Experimental rotational parameters obtained for the observed D isotopologues of conformer SA-w (I-w-a) of salicylic acid – water cluster. The centrifugal distortion constants for all the isotopologues were fixed to the parent values. See Figure S3 or Table S12 for the atom labelling.

| <b>Fitted<br/>Param.<sup>a</sup></b>   | <b>D<sub>15</sub></b>      | <b>D<sub>16</sub></b> | <b>D<sub>18</sub></b> | <b>D<sub>19</sub></b> |
|----------------------------------------|----------------------------|-----------------------|-----------------------|-----------------------|
| <i>A</i> /MHz                          | 2303.2538(24) <sup>b</sup> | 2270.4682(19)         | 2311.152(15)          | 2311.8536(35)         |
| <i>B</i> /MHz                          | 638.94582(43)              | 644.94882(32)         | 634.33584(77)         | 625.31918(61)         |
| <i>C</i> /MHz                          | 500.70308(30)              | 502.79168(22)         | 498.25634(52)         | 492.99050(33)         |
| <i>P<sub>cc</sub></i> /uÅ <sup>2</sup> | 0.51920(68)                | 0.51881(51)           | 0.5401(17)            | 0.83388(90)           |
| N                                      | 14                         | 13                    | 10                    | 11                    |
| $\sigma$ /kHz                          | 7.2                        | 5.5                   | 7.7                   | 8.9                   |

<sup>a</sup> *A*, *B* and *C* are the rotational constants. *P<sub>cc</sub>* is the planar moment of inertia, derived from  $P_{cc}=(I_a+I_b-I_c)/2$ .

N is the number of rotational transitions fitted.  $\sigma$  is the rms deviations of the fit.

<sup>b</sup> Standard error is given in parentheses in units of the last digits.

**Table S8.**  $r_s$  and  $r_m$  geometry parameters (lengths in Å and angles in degree) experimentally determined and their comparison with the  $r_e$  structure predicted at B3LYP-D3/6-311++G(d,p) level of theory and with the  $r_a$  structure obtained by gas-phase electron diffraction [12] for the conformer I of salicylic acid. For the  $r_m$  structure the  $r_m^{(1L)}$  definition has been chosen. This definition employs  $C_\alpha$  coefficients to reproduce the vibration-rotation term in order to obtain the mass-dependant moments of inertia from the effective ones. The different  $C_\alpha$  constants were estimated to have similar values so in the final fits these were assumed to be equal. The L refers to the parameter  $\delta_H$  for all  $r_{m-L}(\text{C-H})$  bonds, which in this case was fixed to 0.01 Å [60]. See Figure 3 or Table S9 for atom labelling.

| Parameter                                           | $r_s$                   | $r_m^{(1L)}$            | $r_a^a$   | $r_e$ |
|-----------------------------------------------------|-------------------------|-------------------------|-----------|-------|
| $r(\text{C}_1\text{-C}_2)$                          | -                       | 1.4091(51)              | 1.419(3)  | 1.417 |
| $r(\text{C}_2\text{-C}_3)$                          | 1.4114(31) <sup>b</sup> | 1.4064(67)              | 1.407(6)  | 1.402 |
| $r(\text{C}_3\text{-C}_4)$                          | 1.3813(51)              | 1.3809(96)              | 1.395(4)  | 1.384 |
| $r(\text{C}_4\text{-C}_5)$                          | 1.4083(50)              | 1.4120(87)              | 1.413(6)  | 1.402 |
| $r(\text{C}_5\text{-C}_6)$                          | 1.3920(30)              | 1.3841(73)              | 1.396(4)  | 1.383 |
| $r(\text{C}_1\text{-C}_6)$                          | -                       | 1.4031(79) <sup>c</sup> | 1.410(6)  | 1.408 |
| $r(\text{C}_1\text{-C}_{11})$                       | -                       | 1.4682(83)              | 1.465(8)  | 1.465 |
| $r(\text{C}_2\text{-O}_{12})$                       | -                       | 1.342(13)               | 1.333(7)  | 1.344 |
| $r(\text{C}_{11}\text{-O}_{13})$                    | -                       | 1.3496(42) <sup>c</sup> | 1.339(7)  | 1.350 |
| $r(\text{C}_{11}\text{-O}_{14})$                    | -                       | 1.2258(42) <sup>c</sup> | 1.228(6)  | 1.226 |
| $r(\text{O}_{12}\text{-H}_{16})$                    | -                       | 0.990(14)               | 1.051(20) | 0.980 |
| $r(\text{O}_{13}\text{-H}_{15})$                    | -                       | 0.9685(19) <sup>c</sup> | 1.063(20) | 0.968 |
| $r(\text{O}_{14}\cdots\text{H}_{16})$               | -                       | 1.7569(40) <sup>c</sup> | 1.727(14) | 1.775 |
| $\angle(\text{C}_1\text{-C}_2\text{-C}_3)$          | -                       | 119.2(5) <sup>c</sup>   | 120.0(3)  | 119.2 |
| $\angle(\text{C}_2\text{-C}_3\text{-C}_4)$          | 120.1(2)                | 120.1(3)                | 120.8(3)  | 120.2 |
| $\angle(\text{C}_3\text{-C}_4\text{-C}_5)$          | 120.8(1)                | 120.9(1)                | 118.5(3)  | 121.0 |
| $\angle(\text{C}_4\text{-C}_5\text{-C}_6)$          | 119.2(1)                | 119.1(3)                | 122.0(3)  | 119.3 |
| $\angle(\text{C}_1\text{-C}_6\text{-C}_5)$          | -                       | 120.7(5) <sup>c</sup>   | 119.1(3)  | 120.9 |
| $\angle(\text{C}_2\text{-C}_1\text{-C}_6)$          | -                       | 119.9(7) <sup>c</sup>   | 119.6(3)  | 119.3 |
| $\angle(\text{C}_2\text{-C}_1\text{-C}_{11})$       | -                       | 118.4(5) <sup>c</sup>   | -         | 119.0 |
| $\angle(\text{C}_6\text{-C}_1\text{-C}_{11})$       | -                       | 121.7(5) <sup>c</sup>   | -         | 121.7 |
| $\angle(\text{C}_1\text{-C}_2\text{-O}_{12})$       | -                       | 123.5(8) <sup>c</sup>   | -         | 123.3 |
| $\angle(\text{C}_3\text{-C}_2\text{-O}_{12})$       | -                       | 117.2(6)                | -         | 117.5 |
| $\angle(\text{C}_1\text{-C}_{11}\text{-O}_{13})$    | -                       | 113.9(3)                | -         | 114.7 |
| $\angle(\text{C}_1\text{-C}_{11}\text{-O}_{14})$    | -                       | 125.3(4) <sup>c</sup>   | -         | 124.5 |
| $\angle(\text{C}_2\text{-O}_{12}\text{-H}_{16})$    | -                       | 107.6(6)                | -         | 108.2 |
| $\angle(\text{C}_{11}\text{-O}_{13}\text{-H}_{15})$ | -                       | 105.4(2)                | -         | 107.1 |
| $\angle(\text{O}_{12}\text{-H}_{16}\text{-O}_{14})$ | -                       | 145.4(3) <sup>c</sup>   | -         | 144.5 |
| $C_\alpha^d / u^{1/2} \cdot \text{Å}$               | -                       | 0.01742(35)             | -         | -     |
| $\delta_H / u^{1/2} \cdot \text{Å}$                 | -                       | [0.010] <sup>e</sup>    | -         | -     |
| $\sigma_{\text{fit}}^f / u \cdot \text{Å}^2$        | -                       | 0.009792                | -         | -     |

<sup>a</sup> The  $r_a$  structure has been taken from the reference 12. <sup>b</sup> Standard error is given in parenthesis in units of the last digit. <sup>c</sup> Derived parameters. <sup>d</sup> Fitted using the assumption  $C_\alpha = C_a = C_b = C_c$ . <sup>e</sup> Fixed values for  $\text{H}_{15}$  and  $\text{H}_{16}$ . <sup>f</sup> Standard deviation of the fit of all the rotational constants.

**Table S9.** Principal inertial axis coordinates for the atoms of conformer I of salicylic acid. The table compares the theoretical coordinates ( $r_e$ ) calculated at the B3LYP-D3/6-311++G(d,p) level of theory with the experimental  $r_s$  and  $r_m$  coordinates. The definition  $r_m^{(1L)}$  was chosen for the  $r_m$  determination. [60]. The hydrogen H<sub>15</sub> and H<sub>16</sub> coordinates were also compared with the obtained  $r_s$  coordinates in the previous study [11].

| atom            | method | <i>a</i>                | <i>b</i>    | <i>c</i> |
|-----------------|--------|-------------------------|-------------|----------|
| C <sub>1</sub>  | $r_e$  | 0.1737                  | 0.2305      | 0.000    |
|                 | $r_m$  | 0.1675(82) <sup>a</sup> | 0.2623(59)  | 0.000    |
|                 | $r_s$  | [0.000] <sup>b</sup>    | 0.2446(34)  | 0.000    |
| C <sub>2</sub>  | $r_e$  | -0.5442                 | -0.9618     | 0.000    |
|                 | $r_m$  | -0.5362(63)             | -0.9585(42) | 0.000    |
|                 | $r_s$  | -0.5292(30)             | -0.9552(16) | 0.000    |
| C <sub>3</sub>  | $r_e$  | -1.9455                 | -0.9330     | 0.000    |
|                 | $r_m$  | -1.9425(20)             | -0.9411(48) | 0.000    |
|                 | $r_s$  | -1.94056(78)            | -0.9384(16) | 0.000    |
| C <sub>4</sub>  | $r_e$  | -2.6183                 | 0.2770      | 0.000    |
|                 | $r_m$  | -2.6201(14)             | 0.2622(89)  | 0.000    |
|                 | $r_s$  | -2.61820(58)            | 0.2652(57)  | 0.000    |
| C <sub>5</sub>  | $r_e$  | -1.9182                 | 1.4923      | 0.000    |
|                 | $r_m$  | -1.9210(21)             | 1.4890(29)  | 0.000    |
|                 | $r_s$  | -1.91901(78)            | 1.4877(10)  | 0.000    |
| C <sub>6</sub>  | $r_e$  | -0.5356                 | 1.4766      | 0.000    |
|                 | $r_m$  | -0.5370(70)             | 1.4758(30)  | 0.000    |
|                 | $r_s$  | -0.5271(29)             | 1.4749(10)  | 0.000    |
| H <sub>7</sub>  | $r_e$  | -2.4743                 | -1.8779     | 0.000    |
|                 | $r_m$  | -2.4635(49)             | -1.8904(64) | 0.000    |
|                 | $r_s$  | -                       | -           | -        |
| H <sub>8</sub>  | $r_e$  | -3.7027                 | 0.2806      | 0.000    |
|                 | $r_m$  | -3.7046(14)             | 0.260(13)   | 0.000    |
|                 | $r_s$  | -                       | -           | -        |
| H <sub>9</sub>  | $r_e$  | -2.4542                 | 2.4332      | 0.000    |
|                 | $r_m$  | -2.4614(41)             | 2.4274(32)  | 0.000    |
|                 | $r_s$  | -                       | -           | -        |
| H <sub>10</sub> | $r_e$  | 0.0249                  | 2.4023      | 0.000    |
|                 | $r_m$  | 0.0218(66)              | 2.4025(41)  | 0.000    |
|                 | $r_s$  | -                       | -           | -        |
| C <sub>11</sub> | $r_e$  | 1.6381                  | 0.2238      | 0.000    |
|                 | $r_m$  | 1.6351(14)              | 0.2225(36)  | 0.000    |
|                 | $r_s$  | 1.63196(93)             | 0.2128(71)  | 0.000    |
| O <sub>12</sub> | $r_e$  | 0.0514                  | -2.1663     | 0.000    |
|                 | $r_m$  | 0.063(14)               | -2.1592(40) | 0.000    |
|                 | $r_s$  | -                       | -           | -        |

<sup>a</sup> Standard error is given in parentheses in units of the last digits.

<sup>b</sup>  $r_s$  parameters in square brackets are fixed to zero owing to the Kraitchman equations give imaginary values.



Table S9 (Continued).

| atom            | method                            | <i>a</i>                | <i>b</i>    | <i>c</i> |
|-----------------|-----------------------------------|-------------------------|-------------|----------|
| O <sub>13</sub> | <i>r<sub>e</sub></i>              | 2.2323                  | 1.4356      | 0.000    |
|                 | <i>r<sub>m</sub></i>              | 2.2153(15) <sup>a</sup> | 1.4411(28)  | 0.000    |
|                 | <i>r<sub>s</sub></i>              | -                       | -           | -        |
| O <sub>14</sub> | <i>r<sub>e</sub></i>              | 2.3070                  | -0.8034     | 0.000    |
|                 | <i>r<sub>m</sub></i>              | 2.3157(33)              | -0.7969(26) | 0.000    |
|                 | <i>r<sub>s</sub></i>              | -                       | -           | -        |
| H <sub>15</sub> | <i>r<sub>e</sub></i>              | 3.1887                  | 1.2831      | 0.000    |
|                 | <i>r<sub>m</sub></i>              | 3.1689(11)              | 1.2722(28)  | 0.000    |
|                 | <i>r<sub>s</sub></i>              | 3.17210(86)             | 1.2696(12)  | 0.000    |
|                 | <i>r<sub>s</sub></i> <sup>c</sup> | 3.173(1)                | 1.270(1)    | 0.000    |
| H <sub>16</sub> | <i>r<sub>e</sub></i>              | 1.0221                  | -2.0284     | 0.000    |
|                 | <i>r<sub>m</sub></i>              | 1.0412(33)              | -2.0068(17) | 0.000    |
|                 | <i>r<sub>s</sub></i>              | 1.0414(11)              | -2.0064(17) | 0.000    |
|                 | <i>r<sub>s</sub></i> <sup>c</sup> | 1.045(5)                | -2.004(1)   | 0.000    |

<sup>a</sup> Standard error is given in parentheses in units of the last digit.

<sup>c</sup> *r<sub>s</sub>* coordinates taken from reference 11.

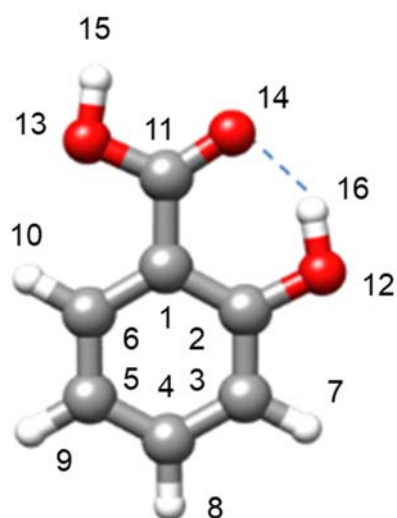

**Table S10.** Predicted stabilizing delocalization energies from the NBO calculations done at B3LYP-D3/6-311++G(d,p) level of theory for the observed I, I-w-a, I-w2-a, I-w3-a and I-w4-a species of salicylic acid and its hydrates. The delocalization energies in the first case are the donor-acceptor conjugative stabilization energies which informs about the charge transfer between  $\pi \leftarrow \pi^*$  orbitals. In the second case they are the electron delocalization energies from the lone pair  $n_o$  of the oxygen atoms to the  $\sigma^*$  orbital of the hydrogen atoms, which characterize the hydrogen bonds.

| $\pi$ | $\pi^*$    | E / kcal·mol <sup>-1</sup> |       |        |        |        |
|-------|------------|----------------------------|-------|--------|--------|--------|
|       |            | I                          | I-w-a | I-w2-a | I-w3-a | I-w4-a |
| C1-C2 | C3-C4      | 13.32                      | 13.45 | 13.52  | 14.20  | 14.21  |
|       | C5-C6      | 22.88                      | 22.87 | 22.85  | 24.01  | 23.92  |
|       | C11-O14    | 29.66                      | 30.88 | 31.20  | 31.07  | 32.13  |
| C3-C4 | C1-C2      | 24.44                      | 24.31 | 24.27  | 26.02  | 26.04  |
|       | C5-C6      | 15.55                      | 15.47 | 15.47  | 15.55  | 15.49  |
| C5-C6 | C1-C2      | 15.00                      | 15.00 | 14.01  | 16.12  | 16.15  |
|       | C3-C4      | 22.61                      | 22.77 | 22.82  | 22.93  | 23.04  |
|       | C11-O14    | 2.84                       | 2.67  | 2.55   | 3.20   | 3.11   |
| $n_o$ | $\sigma^*$ |                            |       |        |        |        |
| O12   | C1-C2      | 37.21                      | 36.93 | 36.64  | 41.99  | 41.79  |
| O13   | C11-O14    | 45.23                      | 53.96 | 59.03  | 62.85  | 68.7   |
| O14   | C1-C11     | 13.13                      | 12.43 | 12.89  | 13.42  | 13.93  |
|       | C11-O13    | 30.40                      | 26.45 | 24.86  | 25.32  | 23.47  |
|       | O12-H16    | 16.02                      | 17.15 | 17.21  | 18.32  | 18.11  |
| O17   | O13-H15    | -                          | 17.59 | 29.75  | 30.46  | 42.55  |
| O14   | O17-H18    | -                          | 3.08  | -      | -      | -      |
|       | O20-H21    | -                          | -     | 4.39   | 2.73   | 8.41   |
| O20   | O17-H18    | -                          | -     | 16.96  | -      | 0.19   |
|       | O23-H24    | -                          | -     | -      | 21.33  | -      |
|       | O26-H27    | -                          | -     | -      | -      | 12.89  |
| O23   | O17-H18    | -                          | -     | -      | 18.25  | -      |
|       | O17-H19    | -                          | -     | -      | -      | 16.19  |
| O26   | O23-H24    | -                          | -     | -      | -      | 15.04  |

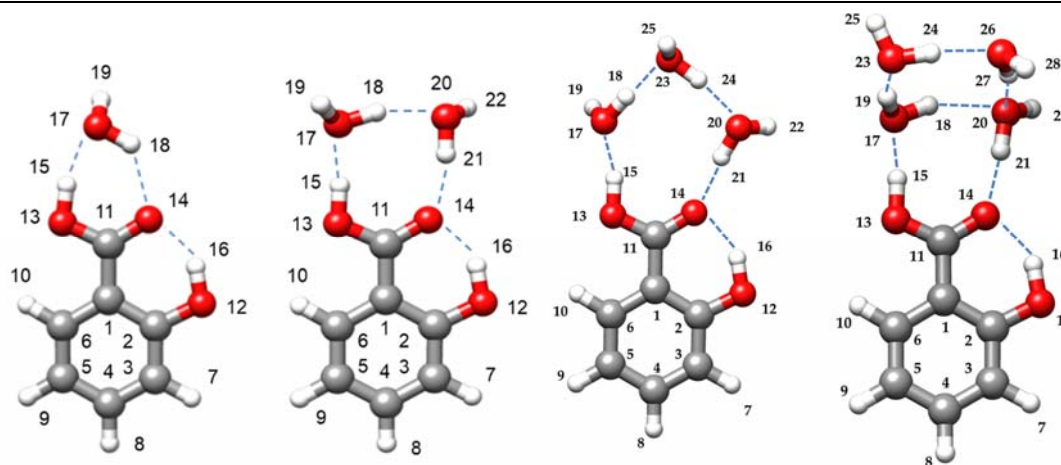

**Table S11.** Predicted bond orders from the NBO calculations done at B3LYP-D3/6-311++G(d,p) level of theory for the observed I, I-w-a, I-w2-a, I-w3-a and I-w4-a species of salicylic acid and its hydrates.

|                 |                 | I      | I-w-a  | I-w2-a | I-w3-a | I-w4-a |
|-----------------|-----------------|--------|--------|--------|--------|--------|
| C <sub>1</sub>  | C <sub>2</sub>  | 1.3789 | 1.3869 | 1.3882 | 1.3209 | 1.3361 |
|                 | C <sub>6</sub>  | 1.4011 | 1.4034 | 1.3991 | 1.4120 | 1.4261 |
|                 | C <sub>11</sub> | 1.0299 | 1.0287 | 1.0266 | 1.0313 | 1.0369 |
| C <sub>2</sub>  | C <sub>3</sub>  | 1.3993 | 1.4044 | 1.4025 | 1.4051 | 1.3906 |
|                 | O <sub>12</sub> | 1.0941 | 1.0931 | 1.0917 | 1.1207 | 1.1283 |
| C <sub>3</sub>  | C <sub>4</sub>  | 1.4869 | 1.4958 | 1.4859 | 1.5712 | 1.5537 |
| C <sub>4</sub>  | C <sub>5</sub>  | 1.4355 | 1.4379 | 1.4426 | 1.4301 | 1.4370 |
| C <sub>5</sub>  | C <sub>6</sub>  | 1.4922 | 1.5036 | 1.5002 | 1.5431 | 1.5400 |
| C <sub>11</sub> | O <sub>13</sub> | 1.2120 | 1.3003 | 1.3314 | 1.1943 | 1.3029 |
|                 | O <sub>14</sub> | 1.7204 | 1.6592 | 1.6285 | 1.5783 | 1.4917 |
| O <sub>12</sub> | H <sub>16</sub> | 0.9728 | 0.9720 | 0.9719 | 0.8902 | 0.8978 |
| O <sub>13</sub> | H <sub>15</sub> | 0.9886 | 0.9699 | 0.9580 | 0.8283 | 0.7508 |
| O <sub>17</sub> | H <sub>18</sub> | -      | 1.0000 | 0.9802 | 0.8637 | 0.9544 |
|                 | H <sub>19</sub> | -      | 0.9919 | 1.0000 | 1.0000 | 0.8949 |
| O <sub>20</sub> | H <sub>21</sub> | -      | -      | 0.9854 | 0.9364 | 0.9176 |
|                 | H <sub>22</sub> | -      | -      | 1.0000 | 1.0000 | 1.0000 |
| O <sub>23</sub> | H <sub>24</sub> | -      | -      | -      | 0.8852 | 0.9039 |
|                 | H <sub>25</sub> | -      | -      | -      | 1.0000 | 1.0000 |
| O <sub>26</sub> | H <sub>27</sub> | -      | -      | -      | -      | 0.9186 |
|                 | H <sub>28</sub> | -      | -      | -      | -      | 1.0000 |

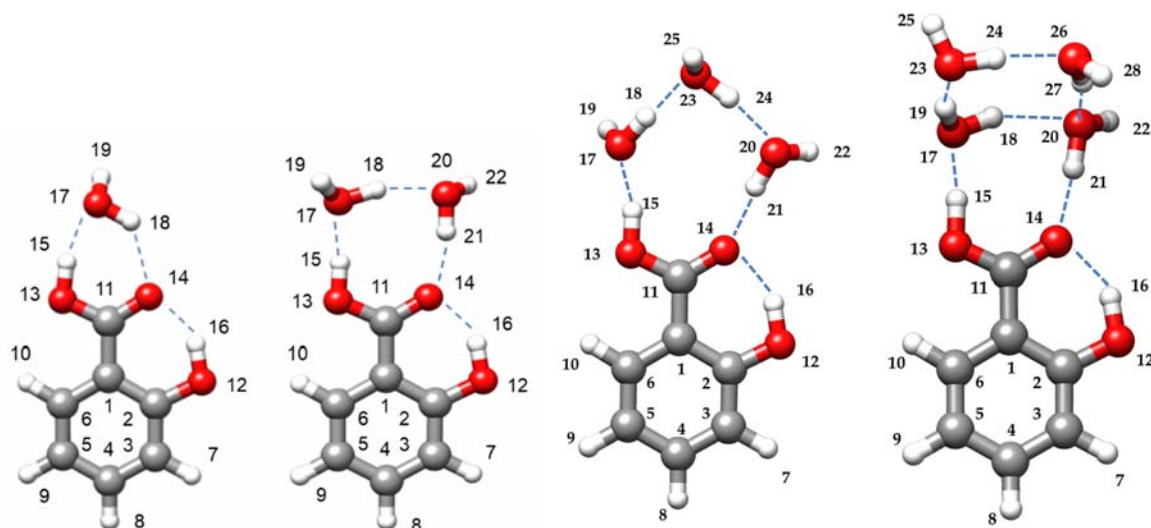

**Table S12.**  $r_s$  and  $r_0$  geometry parameters (lengths in Å and angles in degree) experimentally determined and their comparison with the  $r_e$  structure predicted at B3LYP-D3/6-311++G(d,p) level of theory for the conformer I-w-a of salicylic acid monohydrated cluster.

| Parameter                                                              | $r_s$                   | $r_0$                    | $r_e$ |
|------------------------------------------------------------------------|-------------------------|--------------------------|-------|
| $r(\text{H}_{15}\text{-H}_{18})$                                       | 1.9287(44) <sup>a</sup> | 1.9223(54) <sup>b</sup>  | 1.993 |
| $r(\text{C}_{11}\text{-O}_{13})$                                       | -                       | 1.3496(10) <sup>b</sup>  | 1.330 |
| $r(\text{C}_{11}\text{-O}_{14})$                                       | -                       | 1.22576(98) <sup>b</sup> | 1.239 |
| $r(\text{C}_{12}\text{-O}_{16})$                                       | -                       | 1.0490(80)               | 0.981 |
| $r(\text{O}_{13}\text{-H}_{15})$                                       | -                       | 1.0065(13)               | 0.988 |
| $r(\text{O}_{17}\text{-H}_{18})$                                       | -                       | 0.9650(42) <sup>b</sup>  | 0.972 |
| $r(\text{O}_{14}\cdots\text{H}_{16})$                                  | -                       | 1.7019(60) <sup>b</sup>  | 1.754 |
| $r(\text{H}_{15}\cdots\text{O}_{17})$                                  | -                       | 1.7531(24)               | 1.764 |
| $r(\text{O}_{14}\cdots\text{H}_{18})$                                  | -                       | 1.9819(25)               | 2.031 |
| $\angle(\text{C}_{11}\text{-O}_{13}\text{-H}_{15})$                    | -                       | 108.5(1)                 | 108.9 |
| $\angle(\text{C}_{12}\text{-O}_{16}\text{-H}_{16})$                    | -                       | 107.0(1)                 | 107.8 |
| $\angle(\text{O}_{13}\text{-H}_{15}\cdots\text{O}_{17})$               | -                       | 160.6(2)                 | 158.9 |
| $\angle(\text{C}_{11}\text{-O}_{14}\cdots\text{H}_{18})$               | -                       | 109.2(2)                 | 109.5 |
| $\angle(\text{O}_{14}\cdots\text{H}_{18}\text{-O}_{17})$               | -                       | 136.7(4) <sup>b</sup>    | 132.1 |
| $\angle(\text{O}_{13}\text{-H}_{15}\cdots\text{O}_{17}\text{-H}_{19})$ | -                       | 119.4(8)                 | 117.9 |
| $\angle(\text{C}_{11}\text{-O}_{13}\text{-H}_{15}\cdots\text{O}_{17})$ | -                       | -13.8(5)                 | -4.5  |
| $\angle(\text{C}_1\text{-C}_{11}\text{-O}_{14}\cdots\text{H}_{18})$    | -                       | 173.9(5)                 | 179.8 |
| $\sigma_{\text{fit}}^c / \text{u} \cdot \text{\AA}^2$                  | -                       | 0.005575                 | -     |

<sup>a</sup> Standard error is given in parenthesis in units of the last digit.

<sup>b</sup> Derived parameters.

<sup>c</sup> Standard deviation of the fit of all the rotational constants.

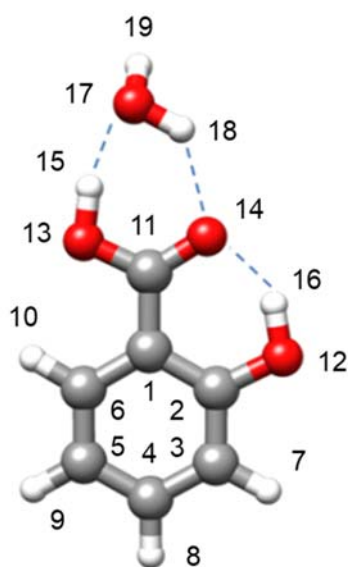

**Table S13.** Principal inertial axis coordinates for the selected atoms of conformer I-w-a of salicylic acid monohydrated cluster. The table compares the theoretical coordinates calculated at the B3LYP-D3/6-311++G(d,p) level of theory with the experimental  $r_s$  and  $r_0$  coordinates.

| atom | method | <i>a</i>                 | <i>b</i>     | <i>c</i>             |
|------|--------|--------------------------|--------------|----------------------|
| H15  | $r_e$  | 2.7275                   | 1.1018       | -0.0056              |
|      | $r_s$  | 2.73986(55) <sup>a</sup> | 1.0767(14)   | -0.046(33)           |
|      | $r_0$  | 2.7404(11)               | 1.0744(27)   | -0.0406(16)          |
| H16  | $r_e$  | 0.3529                   | -2.0915      | 0.0026               |
|      | $r_s$  | 0.3976(38)               | -2.07723(73) | [0.000] <sup>b</sup> |
|      | $r_0$  | 0.4015(77)               | -2.0761(14)  | 0.01323(39)          |
| H18  | $r_e$  | 3.7000                   | -0.6373      | 0.0035               |
|      | $r_s$  | 3.63884(43)              | -0.6182(26)  | 0.152(11)            |
|      | $r_0$  | 3.63926(90)              | -0.6140(50)  | 0.151(19)            |
| H19  | $r_e$  | 4.9103                   | 0.1122       | -0.6267              |
|      | $r_s$  | 4.94329(31)              | 0.117(13)    | -0.5712(27)          |
|      | $r_0$  | 4.94376(64)              | 0.045(12)    | -0.5742(46)          |

<sup>a</sup> Standard error is given in parentheses in units of the last digit.

<sup>b</sup>  $r_s$  parameters in square brackets are fixed to zero owing to the Kraitchman equations give imaginary values.

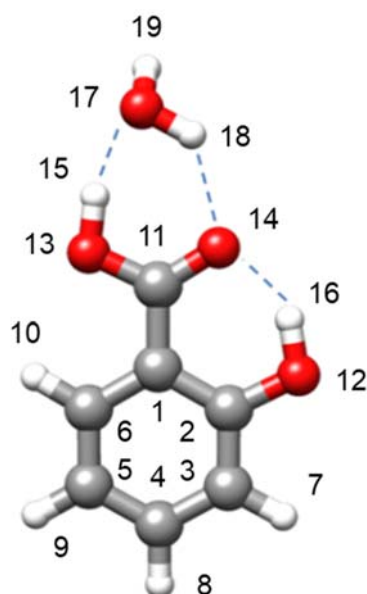

**Table S14.**  $r_e$  geometrical parameters (lengths in Å and angles in degree) predicted at B3LYP-D3/6-311++G(d,p) level of theory for the conformer I-w<sub>2</sub>-a of salicylic acid dihydrated cluster.

| Parameter                                                | $r_e$ |
|----------------------------------------------------------|-------|
| $r(\text{O}_{12}-\text{H}_{16})$                         | 0.980 |
| $r(\text{O}_{14}\cdots\text{H}_{16})$                    | 1.749 |
| $r(\text{C}_{11}-\text{O}_{13})$                         | 1.317 |
| $r(\text{C}_{11}-\text{O}_{14})$                         | 1.243 |
| $r(\text{O}_{13}-\text{H}_{15})$                         | 1.002 |
| $r(\text{O}_{17}-\text{H}_{18})$                         | 0.984 |
| $r(\text{O}_{20}-\text{H}_{21})$                         | 0.979 |
| $r(\text{H}_{15}\cdots\text{O}_{17})$                    | 1.647 |
| $r(\text{O}_{14}\cdots\text{H}_{21})$                    | 1.806 |
| $r(\text{O}_{20}\cdots\text{H}_{18})$                    | 1.749 |
| $\angle(\text{O}_{13}-\text{H}_{15}\cdots\text{O}_{17})$ | 176.3 |
| $\angle(\text{O}_{14}\cdots\text{H}_{21}-\text{O}_{20})$ | 166.0 |
| $\angle(\text{O}_{17}-\text{H}_{18}\cdots\text{O}_{20})$ | 157.7 |

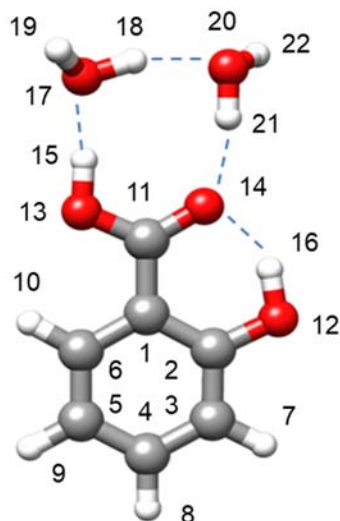

**Table S15.**  $r_e$  geometrical parameters (lengths in Å and angles in degree) predicted at B3LYP-D3/6-311++G(d,p) level of theory for the conformer I-w<sub>3</sub>-a of salicylic acid trihydrated cluster.

| Parameter                                                           | $r_e$  |
|---------------------------------------------------------------------|--------|
| $r(\text{O}_{12}-\text{H}_{16})$                                    | 0.981  |
| $r(\text{O}_{14}\cdots\text{H}_{16})$                               | 1.748  |
| $r(\text{C}_{11}-\text{O}_{13})$                                    | 1.314  |
| $r(\text{C}_{11}-\text{O}_{14})$                                    | 1.243  |
| $r(\text{O}_{13}-\text{H}_{15})$                                    | 1.004  |
| $r(\text{O}_{17}-\text{H}_{18})$                                    | 0.988  |
| $r(\text{O}_{20}-\text{H}_{21})$                                    | 0.978  |
| $r(\text{O}_{23}-\text{H}_{24})$                                    | 0.984  |
| $r(\text{H}_{15}\cdots\text{O}_{17})$                               | 1.627  |
| $r(\text{O}_{14}\cdots\text{H}_{21})$                               | 1.787  |
| $r(\text{O}_{20}\cdots\text{H}_{24})$                               | 1.734  |
| $r(\text{O}_{23}\cdots\text{H}_{18})$                               | 1.707  |
| $\angle(\text{O}_{13}-\text{H}_{15}\cdots\text{O}_{17})$            | 167.4  |
| $\angle(\text{O}_{14}\cdots\text{H}_{21}-\text{O}_{20})$            | 175.7  |
| $\angle(\text{O}_{17}-\text{H}_{18}\cdots\text{O}_{23})$            | 173.3  |
| $\angle(\text{O}_{23}-\text{H}_{24}\cdots\text{O}_{20})$            | 165.6  |
| $\angle(\text{C}_1-\text{C}_{11}-\text{O}_{13}-\text{H}_{15})$      | -177.4 |
| $\angle(\text{C}_1-\text{C}_{11}-\text{O}_{13}\cdots\text{O}_{17})$ | -175.7 |
| $\angle(\text{C}_1-\text{C}_{11}-\text{O}_{13}\cdots\text{O}_{23})$ | 170.5  |
| $\angle(\text{C}_1-\text{C}_{11}-\text{O}_{14}\cdots\text{O}_{20})$ | -153.7 |
| $\angle(\text{C}_1-\text{C}_{11}-\text{O}_{14}\cdots\text{O}_{23})$ | -169.1 |

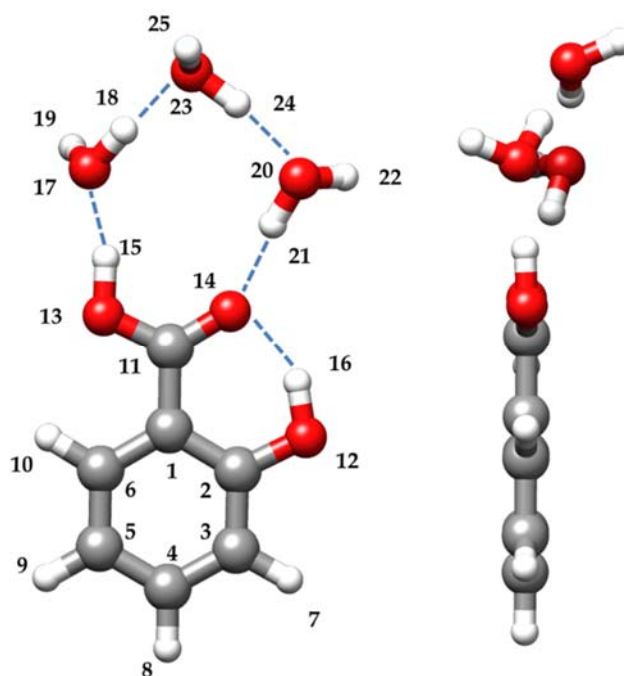

**Table S16.**  $r_e$  geometrical parameters (lengths in Å and angles in degree) predicted at B3LYP-D3/6-311++G(d,p) level of theory for the conformer I-w<sub>4</sub>-a of salicylic acid tetrahydrated cluster.

| Parameter                                                                        | $r_e$  |
|----------------------------------------------------------------------------------|--------|
| $r(\text{O}_{12}-\text{H}_{16})$                                                 | 0.981  |
| $r(\text{O}_{14}\cdots\text{H}_{16})$                                            | 1.742  |
| $r(\text{C}_{11}-\text{O}_{13})$                                                 | 1.307  |
| $r(\text{C}_{11}-\text{O}_{14})$                                                 | 1.250  |
| $r(\text{O}_{13}-\text{H}_{15})$                                                 | 1.020  |
| $r(\text{O}_{17}-\text{H}_{18})$                                                 | 0.970  |
| $r(\text{O}_{17}-\text{H}_{19})$                                                 | 0.983  |
| $r(\text{O}_{20}-\text{H}_{21})$                                                 | 0.987  |
| $r(\text{O}_{23}-\text{H}_{24})$                                                 | 0.981  |
| $r(\text{O}_{26}-\text{H}_{27})$                                                 | 0.978  |
| $r(\text{H}_{15}\cdots\text{O}_{17})$                                            | 1.557  |
| $r(\text{O}_{14}\cdots\text{H}_{21})$                                            | 1.710  |
| $r(\text{O}_{20}\cdots\text{H}_{18})$                                            | 1.972  |
| $r(\text{O}_{20}\cdots\text{H}_{27})$                                            | 1.817  |
| $r(\text{O}_{23}\cdots\text{H}_{19})$                                            | 1.779  |
| $r(\text{O}_{26}\cdots\text{H}_{24})$                                            | 1.789  |
| $\angle(\text{O}_{13}-\text{H}_{15}\cdots\text{O}_{17})$                         | 175.9  |
| $\angle(\text{O}_{14}\cdots\text{H}_{21}-\text{O}_{20})$                         | 174.7  |
| $\angle(\text{O}_{17}-\text{H}_{18}\cdots\text{O}_{20})$                         | 146.9  |
| $\angle(\text{O}_{17}-\text{H}_{19}\cdots\text{O}_{23})$                         | 165.1  |
| $\angle(\text{O}_{23}-\text{H}_{24}\cdots\text{O}_{26})$                         | 164.8  |
| $\angle(\text{O}_{26}-\text{H}_{27}\cdots\text{O}_{20})$                         | 167.9  |
| $\angle(\text{C}_1-\text{C}_{11}-\text{O}_{13}\cdots\text{O}_{17})$              | 179.6  |
| $\angle(\text{C}_1-\text{C}_{11}-\text{O}_{14}\cdots\text{O}_{20})$              | 179.0  |
| $\angle(\text{O}_{13}\cdots\text{O}_{17}\cdots\text{O}_{23})$                    | 114.6  |
| $\angle(\text{O}_{14}\cdots\text{O}_{20}\cdots\text{O}_{26})$                    | 110.8  |
| $\angle(\text{O}_{13}\cdots\text{O}_{17}\cdots\text{O}_{20}\cdots\text{O}_{26})$ | -109.6 |
| $\angle(\text{O}_{13}\cdots\text{O}_{17}\cdots\text{O}_{20}\cdots\text{O}_{26})$ | 113.8  |
| $\angle(\text{C}_{11}-\text{O}_{13}\cdots\text{O}_{17}\cdots\text{O}_{23})$      | -92.6  |
| $\angle(\text{C}_{11}-\text{O}_{14}\cdots\text{O}_{20}\cdots\text{O}_{26})$      | 87.4   |
| $\angle(\text{O}_{17}\cdots\text{O}_{20}\cdots\text{O}_{26}\cdots\text{O}_{23})$ | -0.9   |

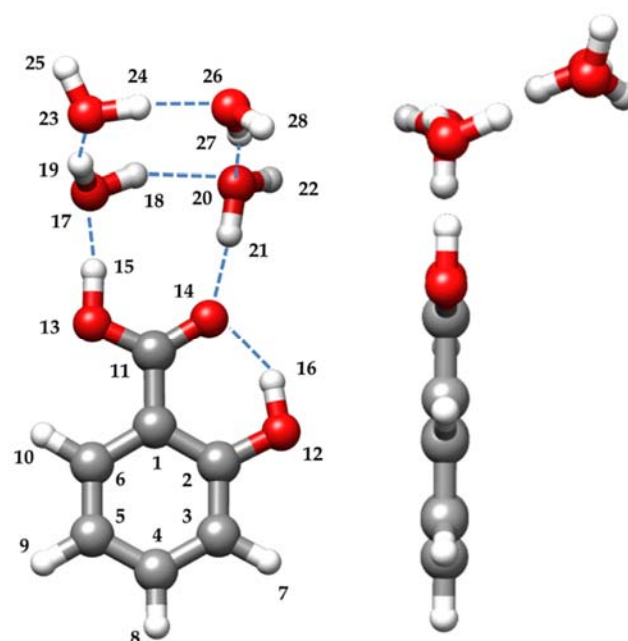

**Table S17.** Observed rotational transitions and residuals (all the values in MHz) for conformer I of the salicylic acid in the ground vibrational state. The lines with frequencies above 8 GHz were measured in the MB-FTMW spectrometer as a thermal recombination product in the spectroscopic analysis of *o*-anisic acid [36].

| J' | K <sub>a</sub> ' | K <sub>b</sub> ' | J'' | K <sub>a</sub> '' | K <sub>b</sub> '' | Obs.      | Obs.-Cal. | J' | K <sub>a</sub> ' | K <sub>b</sub> ' | J'' | K <sub>a</sub> '' | K <sub>b</sub> '' | Obs.      | Obs.-Cal. |
|----|------------------|------------------|-----|-------------------|-------------------|-----------|-----------|----|------------------|------------------|-----|-------------------|-------------------|-----------|-----------|
| 1  | 1                | 1                | 0   | 0                 | 0                 | 3144.1569 | 0.0084    | 1  | 1                | 1                | 0   | 0                 | 0                 | 3144.1569 | 0.0084    |
| 2  | 0                | 2                | 1   | 1                 | 1                 | 2840.9720 | -0.0044   | 5  | 3                | 3                | 5   | 2                 | 4                 | 7352.2379 | 0.0009    |
| 2  | 1                | 2                | 1   | 0                 | 1                 | 4751.9445 | 0.0007    | 5  | 4                | 2                | 5   | 3                 | 2                 | 8795.5073 | 0.0002    |
| 2  | 2                | 1                | 1   | 1                 | 0                 | 7824.6411 | -0.0060   | 5  | 4                | 3                | 5   | 3                 | 3                 | 9151.9816 | 0.0001    |
| 2  | 1                | 1                | 2   | 0                 | 2                 | 2054.0953 | -0.0037   | 6  | 2                | 6                | 5   | 3                 | 3                 | 8441.1694 | 0.0001    |
| 2  | 2                | 0                | 2   | 1                 | 1                 | 3447.3062 | -0.0122   | 6  | 2                | 5                | 5   | 3                 | 2                 | 4016.5305 | -0.0099   |
| 2  | 2                | 1                | 2   | 1                 | 2                 | 4609.0603 | 0.0043    | 6  | 3                | 5                | 5   | 4                 | 2                 | 4236.6208 | 0.0013    |
| 3  | 1                | 3                | 2   | 1                 | 2                 | 5397.7466 | -0.0146   | 6  | 2                | 3                | 6   | 1                 | 5                 | 4899.8952 | -0.0094   |
| 3  | 2                | 1                | 2   | 2                 | 0                 | 6443.8813 | 0.0179    | 6  | 2                | 4                | 6   | 1                 | 6                 | 8672.1102 | 0.0001    |
| 3  | 0                | 3                | 2   | 1                 | 2                 | 4927.6352 | -0.0115   | 6  | 3                | 6                | 6   | 2                 | 4                 | 4947.4359 | 0.0043    |
| 3  | 1                | 3                | 2   | 0                 | 2                 | 6192.2528 | 0.0055    | 6  | 4                | 5                | 6   | 3                 | 3                 | 8321.1307 | -0.0003   |
| 3  | 1                | 2                | 2   | 2                 | 1                 | 3293.1922 | -0.0033   | 6  | 4                | 4                | 6   | 3                 | 4                 | 9234.4157 | 0.0005    |
| 3  | 2                | 2                | 2   | 1                 | 1                 | 9432.4424 | 0.0014    | 7  | 2                | 5                | 6   | 3                 | 3                 | 4494.8206 | 0.0025    |
| 3  | 1                | 2                | 3   | 0                 | 3                 | 2974.6056 | 0.0007    | 7  | 3                | 6                | 6   | 4                 | 3                 | 7226.8784 | 0.0017    |
| 3  | 2                | 1                | 3   | 1                 | 2                 | 3248.5485 | 0.0052    | 7  | 3                | 5                | 6   | 4                 | 2                 | 5078.3827 | -0.0022   |
| 3  | 2                | 2                | 3   | 1                 | 3                 | 5294.2991 | 0.0064    | 7  | 1                | 7                | 7   | 0                 | 7                 | 9690.3441 | -0.0013   |
| 3  | 3                | 0                | 3   | 2                 | 1                 | 6243.5029 | 0.0014    | 7  | 2                | 3                | 7   | 1                 | 6                 | 6427.5530 | 0.0017    |
| 3  | 3                | 1                | 3   | 2                 | 2                 | 6687.5098 | 0.0020    | 7  | 3                | 1                | 7   | 2                 | 5                 | 4993.9969 | 0.0087    |
| 4  | 0                | 4                | 3   | 0                 | 3                 | 7344.3581 | 0.0050    | 7  | 3                | 2                | 7   | 2                 | 6                 | 8904.6994 | 0.0014    |
| 4  | 0                | 4                | 3   | 1                 | 3                 | 6874.2407 | 0.0021    | 7  | 4                | 4                | 7   | 3                 | 4                 | 7651.2910 | 0.0085    |
| 4  | 1                | 4                | 3   | 0                 | 3                 | 7581.6410 | -0.0111   | 7  | 4                | 5                | 7   | 3                 | 5                 | 9456.0961 | 0.0010    |
| 4  | 1                | 3                | 3   | 2                 | 2                 | 5916.1901 | -0.0027   | 8  | 2                | 3                | 8   | 1                 | 7                 | 8289.4650 | 0.0010    |
| 4  | 1                | 3                | 4   | 0                 | 4                 | 4336.2379 | -0.0090   | 8  | 3                | 4                | 8   | 2                 | 6                 | 5576.9324 | -0.0152   |
| 4  | 2                | 2                | 4   | 1                 | 3                 | 3340.5304 | -0.0006   | 8  | 4                | 5                | 8   | 3                 | 5                 | 6963.7282 | 0.0040    |
| 4  | 2                | 3                | 4   | 1                 | 4                 | 6216.2529 | -0.0077   | 8  | 4                | 3                | 8   | 3                 | 6                 | 9873.7942 | 0.0011    |
| 4  | 3                | 1                | 4   | 2                 | 2                 | 5800.5691 | -0.0151   | 9  | 3                | 2                | 9   | 2                 | 7                 | 6752.9531 | -0.0135   |
| 4  | 3                | 2                | 4   | 2                 | 3                 | 6924.0407 | -0.0047   | 9  | 4                | 3                | 9   | 3                 | 6                 | 6524.7030 | -0.0159   |
| 4  | 4                | 1                | 4   | 3                 | 2                 | 9147.2357 | -0.0015   | 10 | 3                | 6                | 10  | 2                 | 8                 | 8454.1179 | 0.0003    |
| 5  | 0                | 5                | 4   | 1                 | 4                 | 8675.8944 | 0.0004    | 10 | 5                | 4                | 10  | 4                 | 6                 | 9351.3204 | -0.0003   |
| 5  | 1                | 5                | 4   | 0                 | 4                 | 9020.2548 | 0.0005    | 5  | 3                | 5                | 5   | 2                 | 4                 | 7352.2379 | 0.0009    |
| 5  | 1                | 4                | 4   | 2                 | 3                 | 8491.9491 | -0.0002   |    |                  |                  |     |                   |                   |           |           |
| 5  | 2                | 3                | 4   | 3                 | 2                 | 5431.8666 | 0.0022    |    |                  |                  |     |                   |                   |           |           |
| 5  | 1                | 4                | 5   | 0                 | 5                 | 6032.3278 | 0.0116    |    |                  |                  |     |                   |                   |           |           |
| 5  | 2                | 3                | 5   | 1                 | 4                 | 3863.9545 | -0.0058   |    |                  |                  |     |                   |                   |           |           |
| 5  | 2                | 4                | 5   | 1                 | 5                 | 7355.1534 | -0.0039   |    |                  |                  |     |                   |                   |           |           |
| 5  | 3                | 2                | 5   | 2                 | 3                 | 5290.7705 | -0.0007   |    |                  |                  |     |                   |                   |           |           |



**Table S18.** Observed rotational transitions and residuals (all the values in MHz) for the  $^{13}\text{C}$  isotopomers of conformer I of salicylic acid in the ground vibrational state.

| $^{13}\text{C}_1$ |                  |                  |     |                   |                   |           |           | $^{13}\text{C}_5$    |                  |                  |     |                   |                   |           |           |
|-------------------|------------------|------------------|-----|-------------------|-------------------|-----------|-----------|----------------------|------------------|------------------|-----|-------------------|-------------------|-----------|-----------|
| J'                | K <sub>a</sub> ' | K <sub>b</sub> ' | J'' | K <sub>a</sub> '' | K <sub>b</sub> '' | Obs.      | Obs.-Cal. | J'                   | K <sub>a</sub> ' | K <sub>b</sub> ' | J'' | K <sub>a</sub> '' | K <sub>b</sub> '' | Obs.      | Obs.-Cal. |
| 2                 | 1                | 2                | 1   | 0                 | 1                 | 4751.0232 | -0.0181   | 2                    | 2                | 1                | 1   | 1                 | 0                 | 7747.5599 | 0.0024    |
| 3                 | 1                | 3                | 2   | 0                 | 2                 | 6191.1651 | -0.0094   | 3                    | 0                | 3                | 2   | 1                 | 2                 | 4884.3544 | -0.0095   |
| 3                 | 3                | 0                | 3   | 2                 | 1                 | 6240.3156 | 0.0098    | 3                    | 1                | 3                | 2   | 0                 | 2                 | 6133.3180 | 0.0039    |
| 4                 | 0                | 4                | 3   | 1                 | 3                 | 6873.9352 | 0.0062    | 3                    | 2                | 1                | 3   | 1                 | 2                 | 3213.5115 | -0.0041   |
| 4                 | 1                | 4                | 3   | 0                 | 3                 | 7580.4789 | 0.0016    | 3                    | 2                | 2                | 3   | 1                 | 3                 | 5241.4663 | 0.0190    |
| 4                 | 1                | 3                | 3   | 2                 | 2                 | 5917.5879 | 0.0081    | 3                    | 3                | 0                | 3   | 2                 | 1                 | 6175.7001 | -0.0021   |
| 4                 | 1                | 3                | 4   | 0                 | 4                 | 4336.4057 | 0.0054    | 3                    | 3                | 1                | 3   | 2                 | 2                 | 6616.9130 | -0.0046   |
| 4                 | 2                | 3                | 4   | 1                 | 4                 | 6214.8713 | -0.0136   | 4                    | 0                | 4                | 3   | 1                 | 3                 | 6812.3164 | 0.0038    |
| 4                 | 3                | 1                | 4   | 2                 | 2                 | 5797.2780 | 0.0111    | 4                    | 1                | 4                | 3   | 0                 | 3                 | 7510.0423 | -0.0008   |
| 5                 | 3                | 2                | 5   | 2                 | 3                 | 5287.5748 | -0.0043   | 4                    | 2                | 3                | 4   | 1                 | 4                 | 6155.9342 | -0.0149   |
| 6                 | 3                | 3                | 6   | 2                 | 4                 | 4944.7776 | -0.0003   | 4                    | 3                | 2                | 4   | 2                 | 3                 | 6851.9933 | 0.0056    |
| $^{13}\text{C}_2$ |                  |                  |     |                   |                   |           |           | 5                    | 2                | 3                | 5   | 1                 | 4                 | 3827.6305 | 0.0070    |
| J'                | K <sub>a</sub> ' | K <sub>b</sub> ' | J'' | K <sub>a</sub> '' | K <sub>b</sub> '' | Obs.      | Obs.-Cal. | 5                    | 3                | 3                | 5   | 2                 | 4                 | 7277.4019 | -0.0044   |
| 2                 | 1                | 2                | 1   | 0                 | 1                 | 4737.6000 | 0.0039    | $^{13}\text{C}_6$    |                  |                  |     |                   |                   |           |           |
| 3                 | 0                | 3                | 2   | 1                 | 2                 | 4926.2982 | -0.0030   | J'                   | K <sub>a</sub> ' | K <sub>b</sub> ' | J'' | K <sub>a</sub> '' | K <sub>b</sub> '' | Obs.      | Obs.-Cal. |
| 3                 | 1                | 3                | 2   | 0                 | 2                 | 6174.9609 | 0.0000    | 1                    | 1                | 1                | 0   | 0                 | 0                 | 3117.8024 | -0.0144   |
| 4                 | 0                | 4                | 3   | 1                 | 3                 | 6867.0631 | 0.0116    | 2                    | 1                | 2                | 1   | 0                 | 1                 | 4719.3813 | -0.0044   |
| 4                 | 1                | 3                | 3   | 2                 | 2                 | 5932.5785 | -0.0113   | 2                    | 2                | 1                | 1   | 1                 | 0                 | 7751.8921 | 0.0134    |
| 4                 | 3                | 2                | 4   | 2                 | 3                 | 6883.4627 | -0.0077   | 3                    | 0                | 3                | 2   | 1                 | 2                 | 4929.4646 | 0.0081    |
| 5                 | 1                | 4                | 5   | 0                 | 5                 | 6033.8355 | 0.0061    | 3                    | 1                | 3                | 2   | 0                 | 2                 | 6153.5491 | 0.0033    |
| $^{13}\text{C}_3$ |                  |                  |     |                   |                   |           |           | 3                    | 2                | 1                | 3   | 1                 | 2                 | 3191.0841 | -0.0058   |
| J'                | K <sub>a</sub> ' | K <sub>b</sub> ' | J'' | K <sub>a</sub> '' | K <sub>b</sub> '' | Obs.      | Obs.-Cal. | 4                    | 0                | 4                | 3   | 1                 | 3                 | 6862.7556 | -0.0040   |
| 2                 | 1                | 2                | 1   | 0                 | 1                 | 4725.0354 | 0.0028    | 4                    | 1                | 3                | 4   | 0                 | 4                 | 4341.8484 | 0.0007    |
| 3                 | 0                | 3                | 2   | 1                 | 2                 | 4880.0778 | -0.0088   | 4                    | 2                | 2                | 4   | 1                 | 3                 | 3298.0640 | 0.0045    |
| 3                 | 1                | 3                | 2   | 0                 | 2                 | 6155.1422 | 0.0087    | 4                    | 3                | 1                | 4   | 2                 | 2                 | 5681.1387 | -0.0058   |
| 3                 | 2                | 2                | 3   | 1                 | 3                 | 5274.9843 | -0.0171   | 4                    | 3                | 2                | 4   | 2                 | 3                 | 6824.8598 | -0.0011   |
| 4                 | 0                | 4                | 3   | 1                 | 3                 | 6815.5527 | -0.0042   | 5                    | 2                | 3                | 4   | 3                 | 2                 | 5546.8172 | -0.0044   |
| 4                 | 1                | 4                | 3   | 0                 | 3                 | 7533.4870 | 0.0028    | 5                    | 3                | 3                | 5   | 2                 | 4                 | 7262.2342 | -0.0008   |
| 4                 | 1                | 3                | 4   | 0                 | 4                 | 4292.5050 | -0.0042   | $^{13}\text{C}_{11}$ |                  |                  |     |                   |                   |           |           |
| 4                 | 2                | 3                | 4   | 1                 | 4                 | 6185.0092 | -0.0004   | J'                   | K <sub>a</sub> ' | K <sub>b</sub> ' | J'' | K <sub>a</sub> '' | K <sub>b</sub> '' | Obs.      | Obs.-Cal. |
| 4                 | 3                | 2                | 4   | 2                 | 3                 | 6913.4251 | -0.0023   | 2                    | 1                | 2                | 1   | 0                 | 1                 | 4741.1617 | 0.0041    |
| 5                 | 2                | 4                | 5   | 1                 | 5                 | 7309.8770 | 0.0150    | 2                    | 2                | 1                | 1   | 1                 | 0                 | 7819.7501 | -0.0196   |
| $^{13}\text{C}_4$ |                  |                  |     |                   |                   |           |           | 3                    | 0                | 3                | 2   | 1                 | 2                 | 4892.5132 | 0.0069    |
| J'                | K <sub>a</sub> ' | K <sub>b</sub> ' | J'' | K <sub>a</sub> '' | K <sub>b</sub> '' | Obs.      | Obs.-Cal. | 3                    | 1                | 3                | 2   | 0                 | 2                 | 6175.7001 | 0.0015    |
| 2                 | 1                | 2                | 1   | 0                 | 1                 | 4725.0354 | -0.0038   | 3                    | 2                | 1                | 3   | 1                 | 2                 | 3264.9584 | 0.0017    |
| 2                 | 1                | 1                | 2   | 0                 | 2                 | 2044.9233 | -0.0071   | 4                    | 0                | 4                | 3   | 1                 | 3                 | 6834.5550 | 0.0014    |
| 3                 | 0                | 3                | 2   | 1                 | 2                 | 4837.5965 | -0.0072   | 4                    | 2                | 3                | 4   | 1                 | 4                 | 6206.9918 | 0.0016    |
| 3                 | 1                | 3                | 2   | 0                 | 2                 | 6150.7572 | 0.0072    | 4                    | 3                | 2                | 4   | 2                 | 3                 | 6943.1865 | -0.0005   |
| 4                 | 0                | 4                | 3   | 1                 | 3                 | 6772.7007 | 0.0054    | 5                    | 2                | 4                | 5   | 1                 | 5                 | 7334.0486 | -0.0055   |
| 4                 | 1                | 4                | 3   | 0                 | 3                 | 7522.3372 | -0.0035   | 5                    | 3                | 3                | 5   | 2                 | 4                 | 7362.4729 | 0.0149    |
| 4                 | 1                | 3                | 4   | 0                 | 4                 | 4251.8141 | 0.0036    |                      |                  |                  |     |                   |                   |           |           |
| 4                 | 2                | 3                | 4   | 1                 | 4                 | 6193.9011 | -0.0048   |                      |                  |                  |     |                   |                   |           |           |
| 4                 | 3                | 2                | 4   | 2                 | 3                 | 6975.2528 | -0.0033   |                      |                  |                  |     |                   |                   |           |           |
| 5                 | 3                | 3                | 5   | 2                 | 4                 | 7380.7390 | 0.0068    |                      |                  |                  |     |                   |                   |           |           |

**Table S19.** Observed rotational transitions and residuals (all the values in MHz) for the D isotopomer of conformer I of salicylic acid in the ground vibrational state.

| D <sub>15</sub> |                   |                   |     |                    |                    |           |           | D <sub>16</sub>                  |                   |                   |     |                    |                    |           |           |
|-----------------|-------------------|-------------------|-----|--------------------|--------------------|-----------|-----------|----------------------------------|-------------------|-------------------|-----|--------------------|--------------------|-----------|-----------|
| J'              | K <sub>-1</sub> ' | K <sub>+1</sub> ' | J'' | K <sub>-1</sub> '' | K <sub>+1</sub> '' | Obs.      | Obs.-Cal. | J'                               | K <sub>-1</sub> ' | K <sub>+1</sub> ' | J'' | K <sub>-1</sub> '' | K <sub>+1</sub> '' | Obs.      | Obs.-Cal. |
| 3               | 0                 | 3                 | 2   | 1                  | 2                  | 4799.1786 | -0.0144   | 5                                | 2                 | 4                 | 6   | 1                  | 5                  | 4906.7594 | -0.0086   |
| 3               | 1                 | 3                 | 2   | 0                  | 2                  | 6106.7554 | -0.0029   | 5                                | 3                 | 3                 | 6   | 2                  | 4                  | 4782.5530 | -0.0005   |
| 3               | 2                 | 1                 | 3   | 1                  | 2                  | 3272.8064 | 0.0158    | 6                                | 3                 | 4                 | 6   | 2                  | 5                  | 7866.5361 | 0.0035    |
| 3               | 2                 | 2                 | 3   | 1                  | 3                  | 5262.9475 | -0.0111   | 6                                | 2                 | 5                 | 7   | 1                  | 6                  | 6471.9922 | -0.0019   |
| 4               | 0                 | 4                 | 3   | 1                  | 3                  | 6720.5355 | 0.0053    | 6                                | 3                 | 4                 | 7   | 2                  | 5                  | 4887.8558 | 0.0000    |
| 4               | 1                 | 4                 | 3   | 0                  | 3                  | 7467.9881 | 0.0000    | 7                                | 3                 | 5                 | 8   | 2                  | 6                  | 5546.7901 | 0.0046    |
| 4               | 1                 | 3                 | 3   | 2                  | 2                  | 5675.3085 | 0.0099    | 7                                | 4                 | 4                 | 8   | 3                  | 5                  | 6671.7283 | -0.0069   |
| 4               | 1                 | 3                 | 4   | 0                  | 4                  | 4217.7278 | 0.0006    | 8                                | 3                 | 6                 | 9   | 2                  | 7                  | 6802.2215 | 0.0030    |
| 4               | 3                 | 2                 | 4   | 2                  | 3                  | 6931.8336 | -0.0065   | 8                                | 4                 | 5                 | 9   | 3                  | 6                  | 6299.5059 | -0.0133   |
| 4               | 2                 | 3                 | 4   | 1                  | 4                  | 6150.8743 | 0.0004    | 9                                | 4                 | 6                 | 10  | 3                  | 7                  | 6447.4680 | -0.0084   |
| 4               | 3                 | 1                 | 4   | 2                  | 2                  | 5872.8458 | -0.0062   | 9                                | 4                 | 7                 | 11  | 3                  | 8                  | 7242.1196 | -0.0066   |
| 5               | 1                 | 4                 | 5   | 0                  | 5                  | 5860.8630 | 0.0000    | 10                               | 5                 | 7                 | 12  | 4                  | 8                  | 7746.9645 | -0.0022   |
| 5               | 2                 | 3                 | 5   | 1                  | 4                  | 3806.4400 | 0.0064    | D <sub>15</sub> -D <sub>16</sub> |                   |                   |     |                    |                    |           |           |
| 6               | 1                 | 5                 | 6   | 0                  | 6                  | 7659.3144 | 0.0024    | J'                               | K <sub>-1</sub> ' | K <sub>+1</sub> ' | J'' | K <sub>-1</sub> '' | K <sub>+1</sub> '' | Obs.      | Obs.-Cal. |
| 6               | 2                 | 4                 | 6   | 1                  | 5                  | 4766.3271 | -0.0011   | 3                                | 1                 | 3                 | 2   | 0                  | 2                  | 6032.8116 | -0.0159   |
| 6               | 3                 | 3                 | 6   | 2                  | 4                  | 5000.6281 | 0.0026    | 3                                | 2                 | 2                 | 3   | 1                  | 3                  | 5159.8023 | 0.0082    |
| 7               | 3                 | 4                 | 6   | 4                  | 3                  | 6716.5451 | 0.0000    | 4                                | 0                 | 4                 | 3   | 1                  | 3                  | 6694.6938 | 0.0088    |
| 7               | 2                 | 5                 | 7   | 1                  | 6                  | 6210.2823 | 0.0003    | 4                                | 1                 | 4                 | 3   | 0                  | 3                  | 7386.0638 | 0.0030    |
| 7               | 3                 | 4                 | 7   | 2                  | 5                  | 4985.7092 | 0.0020    | 4                                | 1                 | 3                 | 4   | 0                  | 4                  | 4221.9313 | -0.0046   |
| 7               | 4                 | 3                 | 7   | 3                  | 4                  | 7792.6605 | 0.0051    | 5                                | 1                 | 4                 | 5   | 0                  | 5                  | 5873.0339 | -0.0080   |
| 8               | 4                 | 5                 | 7   | 5                  | 2                  | 4665.9047 | -0.0011   | 5                                | 2                 | 3                 | 5   | 1                  | 4                  | 3764.1728 | 0.0067    |
| 8               | 3                 | 5                 | 8   | 2                  | 6                  | 5473.3292 | -0.0036   | 5                                | 2                 | 4                 | 5   | 1                  | 5                  | 7165.5617 | 0.0043    |
| 8               | 4                 | 4                 | 8   | 3                  | 5                  | 7103.0519 | 0.0076    | 6                                | 1                 | 5                 | 6   | 0                  | 6                  | 7662.0479 | 0.0130    |
| 9               | 3                 | 6                 | 9   | 2                  | 7                  | 6531.3548 | 0.0018    | 6                                | 2                 | 4                 | 6   | 1                  | 5                  | 4770.6545 | 0.0000    |
| 9               | 4                 | 5                 | 9   | 3                  | 6                  | 6611.2054 | -0.0083   | 6                                | 3                 | 3                 | 6   | 2                  | 4                  | 4825.3072 | 0.0053    |
| 10              | 4                 | 6                 | 10  | 3                  | 7                  | 6552.8229 | -0.0005   | 7                                | 2                 | 5                 | 7   | 1                  | 6                  | 6256.1982 | -0.0038   |
| 11              | 4                 | 7                 | 11  | 3                  | 8                  | 7080.7922 | -0.0009   | 7                                | 3                 | 4                 | 7   | 2                  | 5                  | 4867.8606 | -0.0004   |
| D <sub>16</sub> |                   |                   |     |                    |                    |           |           | 8                                | 3                 | 5                 | 8   | 2                  | 6                  | 5431.8520 | 0.0091    |
| J'              | K <sub>-1</sub> ' | K <sub>+1</sub> ' | J'' | K <sub>-1</sub> '' | K <sub>+1</sub> '' | Obs.      | Obs.-Cal. | 9                                | 3                 | 6                 | 9   | 2                  | 7                  | 6573.0172 | -0.0102   |
| 4               | 1                 | 1                 | 2   | 0                  | 2                  | 2025.5524 | -0.0010   | 9                                | 4                 | 5                 | 9   | 3                  | 6                  | 6364.2018 | -0.0093   |
| 4               | 0                 | 3                 | 2   | 1                  | 2                  | 4922.8451 | -0.0155   | 10                               | 4                 | 6                 | 10  | 3                  | 7                  | 6404.5960 | -0.0034   |
| 2               | 1                 | 3                 | 2   | 0                  | 2                  | 6117.9076 | 0.0058    | 11                               | 4                 | 7                 | 11  | 3                  | 8                  | 7054.7648 | -0.0025   |
| 3               | 1                 | 2                 | 3   | 0                  | 3                  | 2961.0767 | 0.0130    |                                  |                   |                   |     |                    |                    |           |           |
| 3               | 2                 | 1                 | 3   | 1                  | 2                  | 3147.6445 | 0.0035    |                                  |                   |                   |     |                    |                    |           |           |
| 3               | 2                 | 2                 | 3   | 1                  | 3                  | 5193.3566 | 0.0009    |                                  |                   |                   |     |                    |                    |           |           |
| 3               | 3                 | 0                 | 3   | 2                  | 1                  | 6041.1232 | 0.0046    |                                  |                   |                   |     |                    |                    |           |           |
| 3               | 3                 | 1                 | 3   | 2                  | 2                  | 6501.8394 | -0.0020   |                                  |                   |                   |     |                    |                    |           |           |
| 3               | 0                 | 4                 | 3   | 1                  | 3                  | 6844.1195 | 0.0083    |                                  |                   |                   |     |                    |                    |           |           |
| 3               | 1                 | 4                 | 3   | 0                  | 3                  | 7499.0788 | 0.0007    |                                  |                   |                   |     |                    |                    |           |           |
| 4               | 1                 | 3                 | 3   | 2                  | 2                  | 5989.8802 | -0.0017   |                                  |                   |                   |     |                    |                    |           |           |
| 4               | 1                 | 3                 | 4   | 0                  | 4                  | 4339.1256 | -0.0007   |                                  |                   |                   |     |                    |                    |           |           |
| 4               | 2                 | 3                 | 4   | 1                  | 4                  | 6124.0846 | 0.0115    |                                  |                   |                   |     |                    |                    |           |           |
| 4               | 3                 | 1                 | 4   | 2                  | 2                  | 5591.8242 | 0.0077    |                                  |                   |                   |     |                    |                    |           |           |
| 4               | 3                 | 2                 | 4   | 2                  | 3                  | 6747.6209 | 0.0071    |                                  |                   |                   |     |                    |                    |           |           |
| 4               | 1                 | 4                 | 5   | 0                  | 5                  | 6040.6141 | 0.0014    |                                  |                   |                   |     |                    |                    |           |           |
| 4               | 2                 | 3                 | 5   | 1                  | 4                  | 3825.6747 | -0.0118   |                                  |                   |                   |     |                    |                    |           |           |
| 5               | 2                 | 4                 | 5   | 1                  | 5                  | 7271.3925 | 0.0044    |                                  |                   |                   |     |                    |                    |           |           |

**Table S20.** Observed rotational transitions and residuals (all the values in MHz) for the conformer I-w-a of the salicylic acid – water complex in the ground vibrational state. The lines with frequencies above 8 GHz were measured in the MB-FTMW spectrometer as a thermal recombination product in the spectroscopic analysis of *o*-anisic acid [36].

| J' | K <sub>-1</sub> ' | K <sub>+1</sub> ' | J'' | K <sub>-1</sub> '' | K <sub>+1</sub> '' | Obs.      | Obs.-Cal. | J' | K <sub>-1</sub> ' | K <sub>+1</sub> ' | J'' | K <sub>-1</sub> '' | K <sub>+1</sub> '' | Obs.      | Obs.-Cal. |
|----|-------------------|-------------------|-----|--------------------|--------------------|-----------|-----------|----|-------------------|-------------------|-----|--------------------|--------------------|-----------|-----------|
| 1  | 1                 | 1                 | 0   | 0                  | 0                  | 2820.3825 | -0.0004   | 5  | 1                 | 4                 | 5   | 1                  | 5                  | 6300.6709 | 0.0085    |
| 2  | 1                 | 1                 | 1   | 1                  | 0                  | 2440.2790 | -0.0016   | 5  | 1                 | 3                 | 5   | 1                  | 4                  | 4493.7493 | 0.0048    |
| 2  | 0                 | 2                 | 1   | 0                  | 1                  | 2291.7953 | -0.0019   | 6  | 2                 | 6                 | 5   | 1                  | 5                  | 6421.4530 | 0.0057    |
| 2  | 1                 | 2                 | 1   | 0                  | 1                  | 3830.4594 | -0.0001   | 6  | 2                 | 6                 | 5   | 0                  | 5                  | 6634.0042 | -0.0064   |
| 2  | 2                 | 0                 | 1   | 1                  | 1                  | 7599.5574 | 0.0041    | 6  | 1                 | 5                 | 5   | 1                  | 4                  | 7244.1329 | -0.0002   |
| 2  | 2                 | 0                 | 2   | 1                  | 1                  | 5019.2293 | -0.0009   | 6  | 0                 | 4                 | 5   | 2                  | 3                  | 7129.1423 | 0.0026    |
| 2  | 2                 | 1                 | 2   | 1                  | 2                  | 5430.9205 | 0.0052    | 6  | 1                 | 5                 | 5   | 2                  | 4                  | 6862.8118 | 0.0059    |
| 3  | 0                 | 3                 | 2   | 0                  | 2                  | 3416.7925 | -0.0001   | 6  | 2                 | 3                 | 5   | 3                  | 2                  | 6956.2422 | 0.0045    |
| 3  | 1                 | 3                 | 2   | 1                  | 2                  | 3235.1704 | 0.0027    | 6  | 2                 | 4                 | 5   | 3                  | 3                  | 6938.6901 | 0.0088    |
| 3  | 1                 | 2                 | 2   | 1                  | 1                  | 3654.9774 | 0.0025    | 6  | 3                 | 2                 | 5   | 4                  | 1                  | 6929.6329 | 0.0065    |
| 3  | 2                 | 1                 | 2   | 2                  | 0                  | 3483.9167 | -0.0023   | 6  | 3                 | 6                 | 5   | 1                  | 5                  | 5713.9422 | -0.0053   |
| 3  | 2                 | 2                 | 2   | 2                  | 1                  | 3450.3533 | -0.0010   | 6  | 4                 | 6                 | 5   | 0                  | 5                  | 7341.5124 | 0.0020    |
| 3  | 1                 | 3                 | 2   | 0                  | 2                  | 4773.8281 | -0.0019   | 6  | 0                 | 5                 | 6   | 0                  | 6                  | 3621.9393 | -0.0007   |
| 3  | 2                 | 2                 | 2   | 1                  | 1                  | 8461.1408 | -0.0021   | 6  | 1                 | 4                 | 6   | 1                  | 5                  | 4378.7504 | -0.0005   |
| 3  | 1                 | 2                 | 3   | 0                  | 3                  | 2196.9807 | 0.0094    | 6  | 1                 | 5                 | 6   | 1                  | 6                  | 6742.0017 | -0.0193   |
| 3  | 2                 | 1                 | 3   | 1                  | 2                  | 4848.1764 | 0.0020    | 7  | 2                 | 7                 | 6   | 1                  | 6                  | 7468.3652 | -0.0045   |
| 3  | 2                 | 2                 | 3   | 1                  | 3                  | 5646.0997 | -0.0021   | 7  | 2                 | 7                 | 6   | 0                  | 6                  | 7653.9541 | -0.0010   |
| 4  | 1                 | 4                 | 3   | 1                  | 3                  | 4304.4180 | -0.0042   | 7  | 1                 | 6                 | 6   | 1                  | 5                  | 8409.7402 | 0.0002    |
| 4  | 0                 | 4                 | 3   | 0                  | 3                  | 4517.8419 | -0.0029   | 7  | 0                 | 5                 | 6   | 2                  | 4                  | 8381.2270 | -0.0015   |
| 4  | 1                 | 3                 | 3   | 1                  | 2                  | 4862.6841 | 0.0030    | 7  | 1                 | 6                 | 6   | 2                  | 5                  | 7985.5556 | -0.0030   |
| 4  | 2                 | 2                 | 3   | 2                  | 1                  | 4676.5230 | 0.0048    | 7  | 2                 | 7                 | 6   | 0                  | 6                  | 8175.8719 | 0.0024    |
| 4  | 2                 | 3                 | 3   | 2                  | 2                  | 4593.8994 | 0.0007    | 7  | 2                 | 7                 | 6   | 1                  | 6                  | 6946.4605 | 0.0049    |
| 4  | 3                 | 1                 | 3   | 3                  | 0                  | 4618.3385 | -0.0026   | 7  | 1                 | 6                 | 6   | 2                  | 5                  | 4582.1597 | 0.0003    |
| 4  | 3                 | 2                 | 3   | 3                  | 1                  | 4616.4323 | -0.0009   | 7  | 0                 | 6                 | 7   | 0                  | 7                  | 4377.7273 | 0.0025    |
| 4  | 3                 | 2                 | 3   | 3                  | 1                  | 4616.4323 | -0.0009   | 7  | 1                 | 5                 | 7   | 1                  | 6                  | 4350.2385 | -0.0009   |
| 4  | 0                 | 4                 | 3   | 1                  | 3                  | 3160.8209 | 0.0134    | 7  | 1                 | 6                 | 7   | 1                  | 7                  | 7259.2296 | 0.0196    |
| 4  | 1                 | 4                 | 3   | 0                  | 3                  | 5661.4550 | -0.0046   | 8  | 2                 | 8                 | 7   | 1                  | 7                  | 8507.8562 | -0.0005   |
| 4  | 1                 | 3                 | 4   | 0                  | 4                  | 2541.8052 | -0.0023   | 8  | 2                 | 8                 | 7   | 0                  | 7                  | 8658.3758 | -0.0004   |
| 4  | 2                 | 2                 | 4   | 1                  | 3                  | 4662.0206 | 0.0090    | 8  | 1                 | 7                 | 7   | 1                  | 6                  | 9552.1978 | 0.0006    |
| 4  | 2                 | 3                 | 4   | 1                  | 4                  | 5935.5789 | 0.0005    | 8  | 0                 | 6                 | 7   | 2                  | 5                  | 9638.2595 | -0.0022   |
| 5  | 1                 | 5                 | 4   | 1                  | 4                  | 5366.7482 | 0.0010    | 8  | 1                 | 7                 | 7   | 2                  | 6                  | 9098.9641 | 0.0027    |
| 5  | 0                 | 5                 | 4   | 0                  | 4                  | 5590.2975 | -0.0014   | 8  | 2                 | 5                 | 7   | 3                  | 4                  | 9342.0747 | 0.0011    |
| 5  | 0                 | 5                 | 4   | 0                  | 4                  | 5590.2975 | -0.0014   | 8  | 2                 | 8                 | 7   | 0                  | 7                  | 9029.7704 | -0.0006   |
| 5  | 1                 | 4                 | 4   | 1                  | 3                  | 6060.3106 | 0.0016    | 8  | 3                 | 7                 | 7   | 2                  | 6                  | 6148.8009 | 0.0030    |
| 5  | 2                 | 3                 | 4   | 2                  | 2                  | 5892.0385 | -0.0034   | 8  | 1                 | 7                 | 8   | 0                  | 8                  | 5271.5353 | -0.0103   |
| 5  | 2                 | 4                 | 4   | 2                  | 3                  | 5731.8269 | -0.0042   | 8  | 2                 | 6                 | 8   | 1                  | 7                  | 4436.3036 | -0.0004   |
| 5  | 3                 | 2                 | 4   | 3                  | 1                  | 5783.0340 | 0.0001    | 9  | 1                 | 9                 | 8   | 1                  | 8                  | 9540.6364 | -0.0017   |
| 5  | 3                 | 3                 | 4   | 3                  | 2                  | 5776.3927 | 0.0032    | 9  | 0                 | 9                 | 8   | 0                  | 8                  | 9655.5155 | -0.0001   |
| 5  | 4                 | 2                 | 4   | 4                  | 1                  | 5769.3462 | -0.0173   | 9  | 1                 | 8                 | 9   | 0                  | 9                  | 6282.6835 | 0.0073    |
| 5  | 4                 | 1                 | 4   | 4                  | 0                  | 5769.3462 | -0.0173   | 9  | 2                 | 7                 | 9   | 1                  | 8                  | 4659.5542 | 0.0030    |
| 5  | 1                 | 5                 | 4   | 1                  | 4                  | 4446.6858 | 0.0017    | 10 | 2                 | 8                 | 10  | 1                  | 9                  | 5037.7868 | -0.0122   |
| 5  | 0                 | 5                 | 4   | 0                  | 4                  | 6510.3587 | -0.0031   | 13 | 3                 | 10                | 12  | 4                  | 9                  | 4662.8314 | 0.0009    |
| 5  | 0                 | 4                 | 5   | 0                  | 5                  | 3011.8175 | -0.0001   | 16 | 3                 | 13                | 16  | 2                  | 14                 | 7409.6071 | -0.0005   |

**Table S21.** Observed rotational transitions and residuals (all the values in MHz) for the D isotopomer of conformer I-w-a of salicylic acid – water complex in the ground vibrational state.

| D <sub>15</sub> |                   |                   |     |                    |                    |           |           | D <sub>19</sub> |                   |                   |     |                    |                    |           |           |
|-----------------|-------------------|-------------------|-----|--------------------|--------------------|-----------|-----------|-----------------|-------------------|-------------------|-----|--------------------|--------------------|-----------|-----------|
| J'              | K <sub>-1</sub> ' | K <sub>+1</sub> ' | J'' | K <sub>-1</sub> '' | K <sub>+1</sub> '' | Obs.      | Obs.-Cal. | J'              | K <sub>-1</sub> ' | K <sub>+1</sub> ' | J'' | K <sub>-1</sub> '' | K <sub>+1</sub> '' | Obs.      | Obs.-Cal. |
| 5               | 1                 | 5                 | 4   | 0                  | 4                  | 6463.1357 | 0.0004    | 5               | 1                 | 5                 | 4   | 0                  | 4                  | 6413.6422 | -0.0075   |
| 5               | 1                 | 4                 | 4   | 1                  | 3                  | 6004.3561 | -0.0049   | 6               | 0                 | 6                 | 5   | 0                  | 5                  | 6470.7299 | -0.0074   |
| 5               | 2                 | 4                 | 5   | 1                  | 5                  | 6265.9873 | -0.0081   | 6               | 1                 | 6                 | 5   | 1                  | 5                  | 6259.9945 | -0.0039   |
| 6               | 0                 | 6                 | 5   | 0                  | 5                  | 6576.5343 | -0.0018   | 6               | 1                 | 5                 | 5   | 1                  | 4                  | 7039.3161 | -0.0104   |
| 6               | 1                 | 6                 | 5   | 1                  | 5                  | 6365.2345 | 0.0013    | 6               | 2                 | 4                 | 5   | 2                  | 3                  | 6915.0497 | -0.0038   |
| 6               | 1                 | 5                 | 5   | 1                  | 4                  | 7177.6381 | -0.0125   | 6               | 2                 | 5                 | 5   | 2                  | 4                  | 6676.2366 | 0.0077    |
| 6               | 2                 | 4                 | 5   | 2                  | 3                  | 7061.7961 | -0.0002   | 6               | 3                 | 3                 | 5   | 3                  | 2                  | 6758.5973 | 0.0155    |
| 6               | 2                 | 5                 | 5   | 2                  | 4                  | 6800.7922 | -0.0073   | 6               | 1                 | 6                 | 5   | 0                  | 5                  | 7225.0841 | 0.0090    |
| 6               | 3                 | 3                 | 5   | 3                  | 2                  | 6892.1394 | 0.0101    | 6               | 2                 | 5                 | 6   | 1                  | 6                  | 6693.1619 | 0.0005    |
| 6               | 3                 | 4                 | 5   | 3                  | 3                  | 6875.1162 | 0.0142    | 7               | 0                 | 7                 | 6   | 0                  | 6                  | 7469.9648 | -0.0110   |
| 6               | 2                 | 5                 | 6   | 1                  | 6                  | 6701.5700 | 0.0081    | 7               | 1                 | 7                 | 6   | 1                  | 6                  | 7282.2478 | 0.0107    |
| 7               | 0                 | 7                 | 6   | 0                  | 6                  | 7588.2459 | -0.0029   |                 |                   |                   |     |                    |                    |           |           |
| 7               | 1                 | 7                 | 6   | 1                  | 6                  | 7403.2308 | 0.0054    |                 |                   |                   |     |                    |                    |           |           |

  

| D <sub>16</sub> |                   |                   |     |                    |                    |           |           |
|-----------------|-------------------|-------------------|-----|--------------------|--------------------|-----------|-----------|
| J'              | K <sub>-1</sub> ' | K <sub>+1</sub> ' | J'' | K <sub>-1</sub> '' | K <sub>+1</sub> '' | Obs.      | Obs.-Cal. |
| 5               | 1                 | 5                 | 4   | 0                  | 4                  | 6442.8915 | -0.0007   |
| 5               | 1                 | 4                 | 4   | 1                  | 3                  | 6051.2472 | -0.0023   |
| 5               | 2                 | 4                 | 5   | 1                  | 5                  | 6186.9671 | 0.0023    |
| 6               | 0                 | 6                 | 5   | 0                  | 5                  | 6606.7178 | 0.0040    |
| 6               | 1                 | 6                 | 5   | 1                  | 5                  | 6397.7968 | -0.0077   |
| 6               | 1                 | 5                 | 5   | 1                  | 4                  | 7231.4286 | -0.0124   |
| 6               | 2                 | 4                 | 5   | 2                  | 3                  | 7125.6885 | 0.0014    |
| 6               | 2                 | 5                 | 5   | 2                  | 4                  | 6846.3920 | 0.0076    |
| 6               | 3                 | 3                 | 5   | 3                  | 2                  | 6945.5148 | -0.0022   |
| 6               | 3                 | 4                 | 5   | 3                  | 3                  | 6926.2226 | -0.0005   |
| 6               | 1                 | 6                 | 5   | 0                  | 5                  | 7270.7137 | -0.0018   |
| 7               | 1                 | 7                 | 6   | 1                  | 6                  | 7439.7925 | 0.0046    |
| 7               | 0                 | 7                 | 6   | 1                  | 6                  | 6955.7608 | 0.0077    |

  

| D <sub>18</sub> |                   |                   |     |                    |                    |           |           |
|-----------------|-------------------|-------------------|-----|--------------------|--------------------|-----------|-----------|
| J'              | K <sub>-1</sub> ' | K <sub>+1</sub> ' | J'' | K <sub>-1</sub> '' | K <sub>+1</sub> '' | Obs.      | Obs.-Cal. |
| 6               | 0                 | 6                 | 5   | 0                  | 5                  | 6542.9574 | -0.0015   |
| 6               | 1                 | 6                 | 5   | 1                  | 5                  | 6331.3803 | -0.0036   |
| 6               | 1                 | 5                 | 5   | 1                  | 4                  | 7131.8099 | 0.0004    |
| 6               | 2                 | 4                 | 5   | 2                  | 3                  | 7012.0933 | -0.0076   |
| 6               | 2                 | 5                 | 5   | 2                  | 4                  | 6759.8302 | -0.0096   |
| 6               | 3                 | 4                 | 5   | 3                  | 3                  | 6831.5462 | 0.0121    |
| 7               | 0                 | 7                 | 6   | 0                  | 6                  | 7551.0337 | 0.0124    |
| 7               | 1                 | 7                 | 6   | 1                  | 6                  | 7364.4220 | -0.0102   |
| 7               | 3                 | 5                 | 6   | 3                  | 4                  | 7977.2003 | 0.0038    |
| 7               | 0                 | 7                 | 6   | 1                  | 6                  | 6821.1920 | 0.0024    |

**Table S22.** Observed rotational transitions and residuals (all the values in MHz) for the I-w<sub>2</sub>-a conformer of the salicylic acid –water<sub>2</sub> complex in the ground vibrational state.

| J' | K <sub>-1</sub> ' | K <sub>+1</sub> ' | J'' | K <sub>-1</sub> '' | K <sub>+1</sub> '' | Obs.      | Obs.-Cal. | J' | K <sub>-1</sub> ' | K <sub>+1</sub> ' | J'' | K <sub>-1</sub> '' | K <sub>+1</sub> '' | Obs.      | Obs.-Cal. |
|----|-------------------|-------------------|-----|--------------------|--------------------|-----------|-----------|----|-------------------|-------------------|-----|--------------------|--------------------|-----------|-----------|
| 2  | 1                 | 2                 | 1   | 0                  | 1                  | 2850.3823 | 0.0019    | 6  | 1                 | 6                 | 5   | 1                  | 5                  | 4562.0037 | 0.0006    |
| 2  | 2                 | 0                 | 1   | 1                  | 1                  | 5765.3289 | -0.0012   | 6  | 0                 | 6                 | 5   | 0                  | 5                  | 4719.5048 | -0.0084   |
| 2  | 2                 | 0                 | 2   | 1                  | 1                  | 3961.1660 | 0.0145    | 6  | 1                 | 5                 | 5   | 1                  | 4                  | 5099.4890 | -0.0009   |
| 2  | 2                 | 1                 | 2   | 1                  | 2                  | 4229.2841 | 0.0000    | 6  | 2                 | 4                 | 5   | 2                  | 3                  | 4994.3497 | 0.0022    |
| 3  | 0                 | 3                 | 2   | 0                  | 2                  | 2415.5219 | -0.0010   | 6  | 2                 | 5                 | 5   | 2                  | 4                  | 4846.8063 | 0.0048    |
| 3  | 1                 | 3                 | 2   | 1                  | 2                  | 2294.4946 | 0.0008    | 6  | 3                 | 3                 | 5   | 3                  | 2                  | 4896.1995 | 0.0114    |
| 3  | 1                 | 2                 | 2   | 1                  | 1                  | 2567.0230 | 0.0008    | 6  | 3                 | 4                 | 5   | 3                  | 3                  | 4888.3418 | 0.0051    |
| 3  | 1                 | 3                 | 2   | 0                  | 2                  | 3527.0104 | -0.0021   | 6  | 4                 | 2                 | 5   | 4                  | 1                  | 4882.7053 | 0.0220    |
| 3  | 2                 | 1                 | 2   | 1                  | 2                  | 6685.4909 | -0.0009   | 6  | 4                 | 3                 | 5   | 4                  | 2                  | 4882.5404 | -0.0109   |
| 3  | 2                 | 2                 | 2   | 1                  | 1                  | 6390.2091 | 0.0002    | 6  | 5                 | 1                 | 5   | 5                  | 0                  | 4878.5206 | 0.0129    |
| 3  | 2                 | 1                 | 3   | 1                  | 2                  | 3845.7993 | -0.0001   | 6  | 5                 | 2                 | 5   | 5                  | 1                  | 4878.5206 | 0.0129    |
| 3  | 2                 | 2                 | 3   | 1                  | 3                  | 4368.3789 | -0.0064   | 6  | 1                 | 6                 | 5   | 0                  | 5                  | 5369.6333 | 0.0030    |
| 3  | 3                 | 1                 | 3   | 2                  | 2                  | 6824.3537 | 0.0075    | 6  | 1                 | 5                 | 6   | 0                  | 6                  | 2547.0057 | 0.0054    |
| 4  | 0                 | 4                 | 3   | 0                  | 3                  | 3200.0903 | 0.0024    | 6  | 2                 | 4                 | 6   | 1                  | 5                  | 3481.1254 | 0.0048    |
| 4  | 1                 | 4                 | 3   | 1                  | 3                  | 3054.3539 | 0.0028    | 6  | 2                 | 5                 | 6   | 1                  | 6                  | 5075.6521 | 0.0010    |
| 4  | 1                 | 3                 | 3   | 1                  | 2                  | 3417.0610 | -0.0006   | 6  | 3                 | 3                 | 6   | 2                  | 4                  | 6611.7643 | 0.0066    |
| 4  | 2                 | 2                 | 3   | 2                  | 1                  | 3285.9668 | 0.0007    | 6  | 3                 | 4                 | 6   | 2                  | 5                  | 6902.2914 | -0.0137   |
| 4  | 2                 | 3                 | 3   | 2                  | 2                  | 3241.2597 | -0.0012   | 7  | 1                 | 7                 | 6   | 1                  | 6                  | 5309.0884 | 0.0037    |
| 4  | 1                 | 4                 | 3   | 0                  | 3                  | 4165.8406 | -0.0001   | 7  | 0                 | 7                 | 6   | 0                  | 6                  | 5454.5611 | -0.0019   |
| 4  | 2                 | 2                 | 3   | 1                  | 3                  | 7676.9481 | -0.0158   | 7  | 1                 | 6                 | 6   | 1                  | 5                  | 5927.8315 | 0.0055    |
| 4  | 2                 | 3                 | 3   | 1                  | 2                  | 7064.4551 | 0.0075    | 7  | 2                 | 5                 | 6   | 2                  | 4                  | 5866.6237 | -0.0006   |
| 4  | 2                 | 2                 | 4   | 1                  | 3                  | 3714.6987 | -0.0049   | 7  | 2                 | 6                 | 6   | 2                  | 5                  | 5643.2330 | -0.0060   |
| 4  | 2                 | 3                 | 4   | 1                  | 4                  | 4555.2847 | -0.0103   | 7  | 3                 | 4                 | 6   | 3                  | 3                  | 5725.1791 | 0.0033    |
| 4  | 3                 | 2                 | 4   | 2                  | 3                  | 6836.5240 | -0.0125   | 7  | 3                 | 5                 | 6   | 3                  | 4                  | 5707.6929 | -0.0003   |
| 5  | 0                 | 5                 | 4   | 0                  | 4                  | 3968.4742 | -0.0017   | 7  | 4                 | 3                 | 6   | 4                  | 2                  | 5701.2278 | 0.0125    |
| 5  | 1                 | 5                 | 4   | 1                  | 4                  | 3810.3516 | 0.0012    | 7  | 4                 | 4                 | 6   | 4                  | 3                  | 5700.7861 | 0.0092    |
| 5  | 1                 | 4                 | 4   | 1                  | 3                  | 4261.8374 | 0.0001    | 7  | 5                 | 2                 | 6   | 5                  | 1                  | 5694.4502 | -0.0125   |
| 5  | 2                 | 3                 | 4   | 2                  | 2                  | 4133.3939 | -0.0028   | 7  | 5                 | 3                 | 6   | 5                  | 2                  | 5694.4502 | -0.0125   |
| 5  | 2                 | 4                 | 4   | 2                  | 3                  | 4045.9171 | 0.0093    | 7  | 0                 | 7                 | 6   | 1                  | 6                  | 4804.4569 | 0.0109    |
| 5  | 3                 | 2                 | 4   | 3                  | 1                  | 4073.1045 | 0.0005    | 7  | 1                 | 7                 | 6   | 0                  | 6                  | 5959.2098 | 0.0081    |
| 5  | 3                 | 3                 | 4   | 3                  | 2                  | 4070.1408 | -0.0005   | 7  | 1                 | 6                 | 6   | 2                  | 5                  | 2749.0564 | -0.0016   |
| 5  | 0                 | 5                 | 4   | 1                  | 4                  | 3002.7235 | 0.0003    | 7  | 1                 | 6                 | 7   | 0                  | 7                  | 3020.2674 | 0.0042    |
| 5  | 1                 | 5                 | 4   | 0                  | 4                  | 4776.1030 | -0.0001   | 7  | 2                 | 5                 | 7   | 1                  | 6                  | 3419.9169 | -0.0020   |
| 5  | 2                 | 4                 | 4   | 1                  | 3                  | 7693.2798 | -0.0137   | 7  | 2                 | 6                 | 7   | 1                  | 7                  | 5409.8099 | 0.0044    |
| 5  | 2                 | 3                 | 5   | 1                  | 4                  | 3586.2642 | 0.0010    | 7  | 3                 | 4                 | 7   | 2                  | 5                  | 6470.3153 | 0.0061    |
| 5  | 2                 | 4                 | 5   | 1                  | 5                  | 4790.8594 | 0.0068    | 8  | 1                 | 8                 | 7   | 1                  | 7                  | 6051.6304 | 0.0015    |
| 5  | 3                 | 2                 | 5   | 2                  | 3                  | 6709.9106 | -0.0066   | 8  | 0                 | 8                 | 7   | 0                  | 7                  | 6177.2483 | -0.0108   |
| 5  | 3                 | 3                 | 5   | 2                  | 4                  | 6860.7894 | 0.0192    | 8  | 1                 | 7                 | 7   | 1                  | 6                  | 6744.3329 | 0.0026    |

**Table S22** (Continued).

| J' | K <sub>-1</sub> ' | K <sub>+1</sub> ' | J'' | K <sub>-1</sub> '' | K <sub>+1</sub> '' | Obs.      | Obs.-Cal. | J' | K <sub>-1</sub> ' | K <sub>+1</sub> ' | J'' | K <sub>-1</sub> '' | K <sub>+1</sub> '' | Obs.      | Obs.-Cal. |
|----|-------------------|-------------------|-----|--------------------|--------------------|-----------|-----------|----|-------------------|-------------------|-----|--------------------|--------------------|-----------|-----------|
| 8  | 2                 | 6                 | 7   | 2                  | 5                  | 6745.6801 | -0.0099   | 10 | 1                 | 9                 | 9   | 2                  | 8                  | 6072.9160 | 0.0175    |
| 8  | 2                 | 7                 | 7   | 2                  | 6                  | 6434.5679 | -0.0002   | 10 | 1                 | 9                 | 10  | 0                  | 10                 | 4968.8030 | 0.0078    |
| 8  | 3                 | 5                 | 7   | 3                  | 4                  | 6561.9892 | -0.0171   | 10 | 2                 | 8                 | 10  | 1                  | 9                  | 3671.3362 | -0.0116   |
| 8  | 3                 | 6                 | 7   | 3                  | 5                  | 6527.6079 | -0.0011   | 10 | 3                 | 7                 | 10  | 2                  | 8                  | 5835.2668 | -0.0088   |
| 8  | 4                 | 4                 | 7   | 4                  | 3                  | 6522.1184 | -0.0083   | 11 | 1                 | 11                | 10  | 1                  | 10                 | 8255.4204 | 0.0027    |
| 8  | 4                 | 5                 | 7   | 4                  | 4                  | 6520.9338 | 0.0067    | 11 | 1                 | 10                | 10  | 2                  | 9                  | 7170.4743 | -0.0042   |
| 8  | 5                 | 3                 | 7   | 5                  | 2                  | 6511.7363 | -0.0108   | 11 | 1                 | 10                | 11  | 0                  | 11                 | 5751.2823 | -0.0073   |
| 8  | 5                 | 4                 | 7   | 5                  | 3                  | 6511.7363 | -0.0108   | 11 | 2                 | 10                | 11  | 1                  | 11                 | 7215.8052 | 0.0054    |
| 8  | 0                 | 8                 | 7   | 1                  | 7                  | 5672.6052 | -0.0153   | 12 | 3                 | 9                 | 12  | 2                  | 10                 | 5404.6643 | 0.0173    |
| 8  | 1                 | 8                 | 7   | 0                  | 7                  | 6556.2806 | 0.0130    | 13 | 1                 | 12                | 13  | 0                  | 13                 | 7401.9730 | 0.0061    |
| 8  | 1                 | 7                 | 8   | 0                  | 8                  | 3587.3315 | -0.0026   | 13 | 3                 | 10                | 13  | 2                  | 11                 | 5257.4606 | -0.0043   |
| 8  | 3                 | 5                 | 8   | 2                  | 6                  | 6286.6271 | 0.0016    | 15 | 3                 | 12                | 15  | 2                  | 13                 | 5209.8231 | 0.0012    |
| 8  | 3                 | 6                 | 8   | 2                  | 7                  | 7059.8040 | 0.0036    |    |                   |                   |     |                    |                    |           |           |
| 9  | 1                 | 9                 | 8   | 1                  | 8                  | 6789.8926 | -0.0027   |    |                   |                   |     |                    |                    |           |           |
| 9  | 0                 | 9                 | 8   | 0                  | 8                  | 6892.2673 | 0.0015    |    |                   |                   |     |                    |                    |           |           |
| 9  | 1                 | 8                 | 8   | 1                  | 7                  | 7546.3109 | 0.0032    |    |                   |                   |     |                    |                    |           |           |
| 9  | 2                 | 7                 | 8   | 2                  | 6                  | 7625.8658 | 0.0024    |    |                   |                   |     |                    |                    |           |           |
| 9  | 2                 | 8                 | 8   | 2                  | 7                  | 7220.2226 | 0.0073    |    |                   |                   |     |                    |                    |           |           |
| 9  | 3                 | 6                 | 8   | 3                  | 5                  | 7408.8017 | 0.0110    |    |                   |                   |     |                    |                    |           |           |
| 9  | 3                 | 7                 | 8   | 3                  | 6                  | 7347.2530 | -0.0049   |    |                   |                   |     |                    |                    |           |           |
| 9  | 4                 | 5                 | 8   | 4                  | 4                  | 7345.9653 | -0.0128   |    |                   |                   |     |                    |                    |           |           |
| 9  | 4                 | 6                 | 8   | 4                  | 5                  | 7343.1224 | 0.0033    |    |                   |                   |     |                    |                    |           |           |
| 9  | 5                 | 5                 | 8   | 5                  | 4                  | 7330.5143 | -0.0117   |    |                   |                   |     |                    |                    |           |           |
| 9  | 6                 | 3                 | 8   | 6                  | 2                  | 7323.2790 | 0.0030    |    |                   |                   |     |                    |                    |           |           |
| 9  | 6                 | 4                 | 8   | 6                  | 3                  | 7323.2790 | 0.0030    |    |                   |                   |     |                    |                    |           |           |
| 9  | 0                 | 9                 | 8   | 1                  | 8                  | 6513.2612 | 0.0037    |    |                   |                   |     |                    |                    |           |           |
| 9  | 1                 | 9                 | 8   | 0                  | 8                  | 7168.8924 | -0.0111   |    |                   |                   |     |                    |                    |           |           |
| 9  | 1                 | 8                 | 8   | 2                  | 7                  | 4961.8785 | -0.0103   |    |                   |                   |     |                    |                    |           |           |
| 9  | 1                 | 8                 | 9   | 0                  | 9                  | 4241.3820 | 0.0058    |    |                   |                   |     |                    |                    |           |           |
| 9  | 2                 | 7                 | 9   | 1                  | 8                  | 3500.8181 | -0.0162   |    |                   |                   |     |                    |                    |           |           |
| 9  | 2                 | 8                 | 9   | 1                  | 9                  | 6223.0563 | -0.0084   |    |                   |                   |     |                    |                    |           |           |
| 10 | 0                 | 10                | 9   | 0                  | 9                  | 7603.8071 | 0.0011    |    |                   |                   |     |                    |                    |           |           |
| 10 | 1                 | 10                | 9   | 1                  | 9                  | 7524.3052 | -0.0086   |    |                   |                   |     |                    |                    |           |           |
| 10 | 1                 | 9                 | 9   | 1                  | 8                  | 8331.2251 | 0.0001    |    |                   |                   |     |                    |                    |           |           |
| 10 | 2                 | 8                 | 9   | 2                  | 7                  | 8501.7360 | -0.0024   |    |                   |                   |     |                    |                    |           |           |
| 10 | 2                 | 9                 | 9   | 2                  | 8                  | 7999.7196 | 0.0031    |    |                   |                   |     |                    |                    |           |           |
| 10 | 0                 | 10                | 9   | 1                  | 9                  | 7327.1710 | 0.0029    |    |                   |                   |     |                    |                    |           |           |
| 10 | 1                 | 10                | 9   | 0                  | 9                  | 7800.9495 | -0.0022   |    |                   |                   |     |                    |                    |           |           |

**Table S23.** Observed rotational transitions and residuals (all the values in MHz) for the conformer I-w<sub>3</sub>-a of the salicylic acid –water<sub>2</sub> complex in the ground (v=0) and first (v=1) vibrational states.

| J' | K <sub>-1</sub> ' | K <sub>+1</sub> ' | J'' | K <sub>-1</sub> '' | K <sub>+1</sub> '' | v | Obs.      | Obs.-Cal. | J' | K <sub>-1</sub> ' | K <sub>+1</sub> ' | J'' | K <sub>-1</sub> '' | K <sub>+1</sub> '' | v | Obs.      | Obs.-Cal. |
|----|-------------------|-------------------|-----|--------------------|--------------------|---|-----------|-----------|----|-------------------|-------------------|-----|--------------------|--------------------|---|-----------|-----------|
| 2  | 2                 | 1                 | 1   | 1                  | 0                  | 0 | 4498.0969 | -0.0030   | 5  | 3                 | 2                 | 5   | 2                  | 3                  | 0 | 5569.8954 | 0.0108    |
| 2  | 2                 | 1                 | 1   | 1                  | 0                  | 1 | 4498.0969 | -0.0030   | 6  | 1                 | 6                 | 5   | 1                  | 5                  | 0 | 3279.5986 | -0.0027   |
| 3  | 2                 | 1                 | 2   | 1                  | 2                  | 0 | 5194.9698 | -0.0185   | 6  | 1                 | 6                 | 5   | 1                  | 5                  | 1 | 3279.7263 | 0.0020    |
| 3  | 2                 | 1                 | 2   | 1                  | 2                  | 1 | 5194.9004 | -0.0005   | 6  | 1                 | 5                 | 5   | 1                  | 4                  | 0 | 3607.3740 | -0.0128   |
| 3  | 2                 | 2                 | 2   | 1                  | 1                  | 1 | 5019.6712 | 0.0028    | 6  | 1                 | 5                 | 5   | 1                  | 4                  | 1 | 3607.4512 | -0.0131   |
| 3  | 2                 | 2                 | 2   | 1                  | 1                  | 0 | 5019.6712 | 0.0028    | 6  | 2                 | 4                 | 5   | 2                  | 3                  | 0 | 3518.5406 | -0.0033   |
| 3  | 3                 | 0                 | 2   | 2                  | 1                  | 0 | 7351.8188 | -0.0010   | 6  | 2                 | 5                 | 5   | 2                  | 4                  | 0 | 3450.6241 | -0.0070   |
| 3  | 3                 | 0                 | 2   | 2                  | 1                  | 1 | 7351.6907 | 0.0180    | 6  | 2                 | 5                 | 5   | 2                  | 4                  | 1 | 3450.6930 | -0.0171   |
| 3  | 3                 | 1                 | 2   | 2                  | 0                  | 0 | 7349.7515 | 0.0002    | 6  | 3                 | 3                 | 5   | 3                  | 2                  | 0 | 3472.2202 | 0.0047    |
| 3  | 3                 | 1                 | 2   | 2                  | 0                  | 1 | 7349.6119 | 0.0073    | 6  | 3                 | 3                 | 5   | 3                  | 2                  | 1 | 3472.2202 | 0.0047    |
| 3  | 2                 | 1                 | 3   | 1                  | 2                  | 0 | 3218.6146 | -0.0045   | 6  | 1                 | 6                 | 5   | 0                  | 5                  | 1 | 4047.1374 | 0.0061    |
| 3  | 2                 | 1                 | 3   | 1                  | 2                  | 1 | 3218.5337 | 0.0074    | 6  | 2                 | 4                 | 6   | 1                  | 5                  | 0 | 2949.1094 | -0.0035   |
| 3  | 2                 | 2                 | 3   | 1                  | 3                  | 0 | 3538.8605 | -0.0112   | 6  | 2                 | 5                 | 6   | 1                  | 6                  | 0 | 3963.9175 | -0.0018   |
| 3  | 2                 | 2                 | 3   | 1                  | 3                  | 1 | 3538.7372 | 0.0022    | 6  | 2                 | 5                 | 6   | 1                  | 6                  | 1 | 3963.7312 | -0.0066   |
| 3  | 3                 | 0                 | 3   | 2                  | 1                  | 0 | 5611.8717 | 0.0113    | 6  | 3                 | 3                 | 6   | 2                  | 4                  | 0 | 5523.5388 | 0.0192    |
| 3  | 3                 | 0                 | 3   | 2                  | 1                  | 1 | 5611.6807 | 0.0033    | 6  | 3                 | 3                 | 6   | 2                  | 4                  | 1 | 5523.3437 | -0.0125   |
| 4  | 0                 | 4                 | 3   | 0                  | 3                  | 0 | 2286.4552 | 0.0042    | 7  | 0                 | 7                 | 6   | 0                  | 6                  | 0 | 3931.0615 | -0.0017   |
| 4  | 0                 | 4                 | 3   | 0                  | 3                  | 1 | 2286.4552 | 0.0042    | 7  | 0                 | 7                 | 6   | 0                  | 6                  | 1 | 3931.1871 | 0.0110    |
| 4  | 1                 | 4                 | 3   | 0                  | 3                  | 0 | 3160.2814 | 0.0026    | 7  | 1                 | 7                 | 6   | 1                  | 6                  | 0 | 3819.8589 | -0.0009   |
| 4  | 1                 | 4                 | 3   | 0                  | 3                  | 1 | 3160.2814 | 0.0026    | 7  | 1                 | 7                 | 6   | 1                  | 6                  | 1 | 3819.9899 | 0.0057    |
| 4  | 2                 | 3                 | 4   | 1                  | 4                  | 0 | 3651.3358 | -0.0063   | 7  | 1                 | 6                 | 6   | 1                  | 5                  | 0 | 4199.5088 | -0.0162   |
| 4  | 2                 | 3                 | 4   | 1                  | 4                  | 1 | 3651.1854 | 0.0055    | 7  | 1                 | 6                 | 6   | 1                  | 5                  | 1 | 4199.5876 | -0.0097   |
| 4  | 3                 | 2                 | 4   | 2                  | 3                  | 0 | 5627.3813 | -0.0137   | 7  | 2                 | 5                 | 6   | 2                  | 4                  | 0 | 4125.8391 | 0.0015    |
| 4  | 3                 | 2                 | 4   | 2                  | 3                  | 1 | 5627.2080 | -0.0003   | 7  | 2                 | 5                 | 6   | 2                  | 4                  | 1 | 4125.8391 | 0.0015    |
| 5  | 0                 | 5                 | 4   | 0                  | 4                  | 0 | 2843.4585 | 0.0010    | 7  | 3                 | 4                 | 6   | 3                  | 3                  | 0 | 4056.1818 | 0.0019    |
| 5  | 0                 | 5                 | 4   | 0                  | 4                  | 1 | 2843.5408 | 0.0103    | 7  | 3                 | 4                 | 6   | 3                  | 3                  | 1 | 4056.1818 | 0.0019    |
| 5  | 1                 | 5                 | 4   | 1                  | 4                  | 0 | 2737.0847 | -0.0007   | 7  | 3                 | 5                 | 6   | 3                  | 4                  | 0 | 4050.3505 | -0.0022   |
| 5  | 1                 | 5                 | 4   | 1                  | 4                  | 1 | 2737.0847 | -0.0007   | 7  | 3                 | 5                 | 6   | 3                  | 4                  | 1 | 4050.4368 | -0.0016   |
| 5  | 1                 | 4                 | 4   | 1                  | 3                  | 0 | 3011.4643 | -0.0009   | 7  | 5                 | 2                 | 6   | 5                  | 1                  | 1 | 4043.6532 | -0.0014   |
| 5  | 1                 | 4                 | 4   | 1                  | 3                  | 1 | 3011.4643 | -0.0009   | 7  | 5                 | 3                 | 6   | 5                  | 2                  | 1 | 4043.6532 | -0.0014   |
| 5  | 2                 | 3                 | 4   | 2                  | 2                  | 0 | 2918.2721 | -0.0029   | 7  | 0                 | 7                 | 6   | 1                  | 6                  | 0 | 3275.8068 | 0.0079    |
| 5  | 2                 | 3                 | 4   | 2                  | 2                  | 1 | 2918.2721 | -0.0029   | 7  | 0                 | 7                 | 6   | 1                  | 6                  | 1 | 3275.9063 | -0.0003   |
| 5  | 2                 | 4                 | 4   | 2                  | 3                  | 0 | 2878.6130 | 0.0002    | 7  | 1                 | 7                 | 6   | 0                  | 6                  | 1 | 4475.2660 | 0.0124    |
| 5  | 2                 | 4                 | 4   | 2                  | 3                  | 1 | 2878.6730 | -0.0044   | 7  | 2                 | 5                 | 7   | 1                  | 6                  | 0 | 2875.3619 | -0.0008   |
| 5  | 1                 | 5                 | 4   | 0                  | 4                  | 0 | 3610.9246 | 0.0109    | 7  | 2                 | 5                 | 7   | 1                  | 6                  | 1 | 2875.3619 | -0.0008   |
| 5  | 1                 | 5                 | 4   | 0                  | 4                  | 1 | 3610.9246 | 0.0109    | 7  | 2                 | 6                 | 7   | 1                  | 7                  | 0 | 4164.7058 | 0.0016    |
| 5  | 2                 | 4                 | 5   | 1                  | 5                  | 0 | 3792.8982 | 0.0085    | 7  | 2                 | 6                 | 7   | 1                  | 7                  | 1 | 4164.4981 | 0.0048    |
| 5  | 2                 | 4                 | 5   | 1                  | 5                  | 1 | 3792.7505 | -0.0014   | 7  | 3                 | 4                 | 7   | 2                  | 5                  | 0 | 5453.8508 | -0.0047   |

Table S23 (Continued).

| J' | K <sub>-1</sub> ' | K <sub>+1</sub> ' | J'' | K <sub>-1</sub> '' | K <sub>+1</sub> '' | v | Obs.      | Obs.-Cal. | J' | K <sub>-1</sub> ' | K <sub>+1</sub> ' | J'' | K <sub>-1</sub> '' | K <sub>+1</sub> '' | v | Obs.      | Obs.-Cal. |
|----|-------------------|-------------------|-----|--------------------|--------------------|---|-----------|-----------|----|-------------------|-------------------|-----|--------------------|--------------------|---|-----------|-----------|
| 7  | 3                 | 4                 | 7   | 2                  | 5                  | 1 | 5453.6964 | -0.0083   | 9  | 1                 | 9                 | 8   | 0                  | 8                  | 0 | 5333.0471 | -0.0027   |
| 7  | 3                 | 5                 | 7   | 2                  | 6                  | 0 | 5687.0288 | -0.0132   | 9  | 1                 | 9                 | 8   | 0                  | 8                  | 1 | 5333.2402 | 0.0066    |
| 7  | 3                 | 5                 | 7   | 2                  | 6                  | 1 | 5686.8413 | 0.0028    | 10 | 0                 | 10                | 9   | 0                  | 9                  | 0 | 5505.8622 | -0.0075   |
| 8  | 0                 | 8                 | 7   | 0                  | 7                  | 0 | 4462.0436 | 0.0035    | 10 | 0                 | 10                | 9   | 0                  | 9                  | 1 | 5506.0474 | -0.0020   |
| 8  | 0                 | 8                 | 7   | 0                  | 7                  | 1 | 4462.1763 | 0.0013    | 10 | 1                 | 10                | 9   | 1                  | 9                  | 0 | 5426.6261 | -0.0086   |
| 8  | 1                 | 8                 | 7   | 1                  | 7                  | 0 | 4357.7494 | -0.0003   | 10 | 1                 | 10                | 9   | 1                  | 9                  | 1 | 5426.6261 | -0.0086   |
| 8  | 1                 | 8                 | 7   | 1                  | 7                  | 1 | 4357.8974 | 0.0061    | 10 | 1                 | 9                 | 9   | 1                  | 8                  | 0 | 5942.2026 | 0.0006    |
| 8  | 2                 | 6                 | 7   | 2                  | 5                  | 0 | 4738.9407 | -0.0021   | 10 | 1                 | 9                 | 9   | 1                  | 8                  | 1 | 5942.3107 | -0.0056   |
| 8  | 2                 | 6                 | 7   | 2                  | 5                  | 1 | 4739.0235 | -0.0022   | 10 | 3                 | 7                 | 9   | 3                  | 6                  | 0 | 5829.9987 | 0.0025    |
| 8  | 2                 | 7                 | 7   | 2                  | 6                  | 0 | 4588.3474 | 0.0062    | 10 | 3                 | 7                 | 9   | 3                  | 6                  | 1 | 5830.1140 | 0.0077    |
| 8  | 2                 | 7                 | 7   | 2                  | 6                  | 1 | 4588.4661 | 0.0091    | 10 | 0                 | 10                | 9   | 1                  | 9                  | 0 | 5159.1060 | -0.0012   |
| 8  | 3                 | 5                 | 7   | 3                  | 4                  | 0 | 4643.1704 | -0.0048   | 10 | 0                 | 10                | 9   | 1                  | 9                  | 1 | 5159.2556 | -0.0050   |
| 8  | 3                 | 5                 | 7   | 3                  | 4                  | 1 | 4643.2797 | 0.0108    | 10 | 1                 | 10                | 9   | 0                  | 9                  | 0 | 5773.3106 | 0.0034    |
| 8  | 3                 | 6                 | 7   | 3                  | 5                  | 0 | 4631.7135 | 0.0092    | 10 | 1                 | 9                 | 9   | 1                  | 8                  | 0 | 5942.2023 | 0.0004    |
| 8  | 3                 | 6                 | 7   | 3                  | 5                  | 1 | 4631.8139 | 0.0121    | 10 | 1                 | 9                 | 9   | 1                  | 8                  | 1 | 5942.3102 | -0.0061   |
| 8  | 0                 | 8                 | 7   | 1                  | 7                  | 0 | 3917.9794 | 0.0002    | 10 | 3                 | 7                 | 9   | 3                  | 6                  | 0 | 5829.9982 | 0.0020    |
| 8  | 0                 | 8                 | 7   | 1                  | 7                  | 1 | 3918.0947 | -0.0027   | 10 | 3                 | 7                 | 9   | 3                  | 6                  | 1 | 5830.1138 | 0.0075    |
| 8  | 1                 | 8                 | 7   | 0                  | 7                  | 0 | 4901.8099 | -0.0007   | 11 | 0                 | 11                | 10  | 0                  | 10                 | 0 | 6022.8168 | 0.0003    |
| 8  | 1                 | 8                 | 7   | 0                  | 7                  | 1 | 4901.9630 | -0.0057   | 11 | 0                 | 11                | 10  | 0                  | 10                 | 1 | 6023.0202 | 0.0020    |
| 8  | 2                 | 6                 | 8   | 1                  | 7                  | 0 | 2827.5036 | -0.0112   | 11 | 1                 | 11                | 10  | 1                  | 10                 | 0 | 5957.7224 | 0.0083    |
| 8  | 2                 | 6                 | 8   | 1                  | 7                  | 1 | 2827.5036 | -0.0112   | 11 | 1                 | 11                | 10  | 1                  | 10                 | 1 | 5957.9005 | -0.0135   |
| 8  | 2                 | 7                 | 8   | 1                  | 8                  | 0 | 4395.3123 | 0.0168    | 11 | 1                 | 10                | 10  | 1                  | 9                  | 0 | 6507.9718 | 0.0042    |
| 8  | 2                 | 7                 | 8   | 1                  | 8                  | 1 | 4395.0584 | -0.0005   | 11 | 1                 | 10                | 10  | 1                  | 9                  | 1 | 6508.0954 | -0.0052   |
| 8  | 3                 | 5                 | 8   | 2                  | 6                  | 0 | 5358.0903 | 0.0023    | 11 | 2                 | 9                 | 10  | 2                  | 8                  | 0 | 6591.6859 | 0.0041    |
| 8  | 3                 | 5                 | 8   | 2                  | 6                  | 1 | 5357.9308 | -0.0171   | 11 | 3                 | 8                 | 10  | 3                  | 7                  | 1 | 6431.7558 | 0.0035    |
| 9  | 0                 | 9                 | 8   | 0                  | 8                  | 0 | 4986.2897 | 0.0023    | 11 | 3                 | 9                 | 10  | 3                  | 8                  | 0 | 6376.2692 | -0.0048   |
| 9  | 0                 | 9                 | 8   | 0                  | 8                  | 1 | 4986.4408 | -0.0039   | 11 | 3                 | 9                 | 10  | 3                  | 8                  | 1 | 6376.4084 | -0.0003   |
| 9  | 1                 | 9                 | 8   | 1                  | 8                  | 0 | 4893.2757 | -0.0034   | 11 | 0                 | 11                | 10  | 1                  | 10                 | 1 | 5755.5525 | -0.0015   |
| 9  | 1                 | 9                 | 8   | 1                  | 8                  | 1 | 4893.4389 | -0.0008   | 11 | 1                 | 11                | 10  | 0                  | 10                 | 0 | 6225.1607 | 0.0092    |
| 9  | 1                 | 8                 | 8   | 1                  | 7                  | 0 | 5368.0884 | 0.0068    | 11 | 1                 | 11                | 10  | 0                  | 10                 | 1 | 6225.3710 | -0.0072   |
| 9  | 1                 | 8                 | 8   | 1                  | 7                  | 1 | 5368.1716 | -0.0078   | 12 | 0                 | 12                | 11  | 0                  | 11                 | 1 | 6538.9550 | -0.0096   |
| 9  | 2                 | 7                 | 8   | 2                  | 6                  | 0 | 5355.9481 | 0.0024    | 12 | 0                 | 12                | 11  | 0                  | 11                 | 0 | 6538.7405 | -0.0009   |
| 9  | 2                 | 7                 | 8   | 2                  | 6                  | 1 | 5356.0761 | -0.0013   | 12 | 1                 | 12                | 11  | 1                  | 11                 | 0 | 6487.0078 | 0.0020    |
| 9  | 2                 | 8                 | 8   | 2                  | 7                  | 0 | 5153.4320 | 0.0033    | 12 | 1                 | 12                | 11  | 1                  | 11                 | 1 | 6487.2333 | -0.0006   |
| 9  | 2                 | 8                 | 8   | 2                  | 7                  | 1 | 5153.6041 | 0.0011    | 12 | 2                 | 10                | 11  | 2                  | 9                  | 1 | 7205.7509 | -0.0006   |
| 9  | 3                 | 6                 | 8   | 3                  | 5                  | 1 | 5234.2430 | -0.0083   | 12 | 2                 | 11                | 11  | 2                  | 10                 | 0 | 6830.6052 | -0.0017   |
| 9  | 3                 | 7                 | 8   | 3                  | 6                  | 0 | 5213.3825 | -0.0039   | 12 | 2                 | 11                | 11  | 2                  | 10                 | 1 | 6830.7892 | -0.0004   |
| 9  | 3                 | 7                 | 8   | 3                  | 6                  | 1 | 5213.4955 | -0.0002   | 12 | 1                 | 12                | 11  | 0                  | 11                 | 1 | 6689.5912 | 0.0051    |
| 9  | 4                 | 6                 | 8   | 4                  | 5                  | 0 | 5208.7158 | -0.0001   | 13 | 0                 | 13                | 12  | 0                  | 12                 | 0 | 7054.7088 | 0.0024    |
| 9  | 4                 | 6                 | 8   | 4                  | 5                  | 1 | 5208.8316 | 0.0059    | 13 | 0                 | 13                | 12  | 0                  | 12                 | 1 | 7054.9563 | 0.0058    |
| 9  | 0                 | 9                 | 8   | 1                  | 8                  | 0 | 4546.5049 | -0.0118   | 13 | 1                 | 12                | 12  | 1                  | 11                 | 1 | 7610.9945 | -0.0049   |
| 9  | 0                 | 9                 | 8   | 1                  | 8                  | 1 | 4546.6503 | -0.0005   |    |                   |                   |     |                    |                    |   |           |           |



**Table S24.** Observed rotational transitions and residuals (all the values in MHz) for the conformer I-w4-a of the salicylic acid –water<sub>2</sub> complex in the ground vibrational state.

| J' | K <sub>-1</sub> ' | K <sub>+1</sub> ' | J'' | K <sub>-1</sub> '' | K <sub>+1</sub> '' | Obs.      | Obs.-Cal. | J' | K <sub>-1</sub> ' | K <sub>+1</sub> ' | J'' | K <sub>-1</sub> '' | K <sub>+1</sub> '' | Obs.      | Obs.-Cal. |
|----|-------------------|-------------------|-----|--------------------|--------------------|-----------|-----------|----|-------------------|-------------------|-----|--------------------|--------------------|-----------|-----------|
| 3  | 1                 | 3                 | 2   | 0                  | 2                  | 2146.8089 | -0.0062   | 7  | 1                 | 7                 | 6   | 0                  | 6                  | 3751.3734 | 0.0006    |
| 3  | 3                 | 0                 | 2   | 2                  | 1                  | 5513.9673 | 0.0132    | 7  | 2                 | 6                 | 6   | 1                  | 5                  | 5460.7957 | -0.0084   |
| 3  | 3                 | 1                 | 2   | 2                  | 0                  | 5513.2546 | -0.0077   | 7  | 3                 | 4                 | 6   | 2                  | 5                  | 7409.6071 | -0.0009   |
| 4  | 1                 | 4                 | 3   | 0                  | 3                  | 2562.6496 | -0.0015   | 7  | 3                 | 5                 | 6   | 2                  | 4                  | 7360.3244 | 0.0022    |
| 4  | 3                 | 1                 | 3   | 2                  | 2                  | 5984.4313 | 0.0017    | 7  | 3                 | 4                 | 7   | 2                  | 5                  | 4047.5752 | 0.0048    |
| 4  | 3                 | 2                 | 3   | 2                  | 1                  | 5980.9664 | 0.0137    | 7  | 3                 | 5                 | 7   | 2                  | 6                  | 4129.1939 | 0.0114    |
| 4  | 3                 | 1                 | 4   | 2                  | 2                  | 4098.4762 | -0.0011   | 8  | 0                 | 8                 | 7   | 0                  | 7                  | 3698.5373 | 0.0051    |
| 4  | 3                 | 2                 | 4   | 2                  | 3                  | 4108.5900 | -0.0009   | 8  | 1                 | 8                 | 7   | 1                  | 7                  | 3630.9163 | 0.0220    |
| 5  | 0                 | 5                 | 4   | 0                  | 4                  | 2331.8498 | -0.0033   | 8  | 1                 | 7                 | 7   | 1                  | 6                  | 3846.7699 | -0.0109   |
| 5  | 1                 | 4                 | 4   | 1                  | 3                  | 2410.5358 | -0.0024   | 8  | 2                 | 6                 | 7   | 2                  | 5                  | 3798.1278 | 0.0129    |
| 5  | 2                 | 3                 | 4   | 2                  | 2                  | 2357.3344 | -0.0054   | 8  | 2                 | 7                 | 7   | 2                  | 6                  | 3744.2092 | 0.0129    |
| 5  | 2                 | 4                 | 4   | 2                  | 3                  | 2343.8449 | -0.0008   | 8  | 3                 | 5                 | 7   | 3                  | 4                  | 3762.0754 | 0.0030    |
| 5  | 1                 | 5                 | 4   | 0                  | 4                  | 2967.3543 | 0.0025    | 8  | 3                 | 6                 | 7   | 3                  | 5                  | 3759.4316 | 0.0054    |
| 5  | 3                 | 2                 | 4   | 2                  | 3                  | 6456.4877 | -0.0052   | 8  | 5                 | 3                 | 7   | 5                  | 2                  | 3755.9425 | 0.0005    |
| 5  | 3                 | 3                 | 4   | 2                  | 2                  | 6446.0107 | 0.0027    | 8  | 5                 | 4                 | 7   | 5                  | 3                  | 3755.9425 | 0.0005    |
| 5  | 3                 | 2                 | 5   | 2                  | 3                  | 4088.9710 | 0.0058    | 8  | 0                 | 8                 | 7   | 1                  | 7                  | 3193.7919 | 0.0066    |
| 5  | 3                 | 3                 | 5   | 2                  | 4                  | 4112.3457 | -0.0043   | 8  | 1                 | 8                 | 7   | 0                  | 7                  | 4135.6564 | -0.0137   |
| 6  | 0                 | 6                 | 5   | 0                  | 5                  | 2791.0225 | -0.0003   | 8  | 2                 | 7                 | 7   | 1                  | 6                  | 5835.5772 | 0.0037    |
| 6  | 1                 | 6                 | 5   | 1                  | 5                  | 2727.3138 | -0.0008   | 8  | 3                 | 5                 | 7   | 2                  | 6                  | 7893.4910 | -0.0019   |
| 6  | 1                 | 5                 | 5   | 1                  | 4                  | 2890.5948 | 0.0004    | 8  | 4                 | 5                 | 7   | 4                  | 4                  | 3757.3312 | 0.0055    |
| 6  | 2                 | 4                 | 5   | 2                  | 3                  | 2834.7346 | 0.0015    | 8  | 3                 | 5                 | 8   | 2                  | 6                  | 4011.4997 | -0.0006   |
| 6  | 2                 | 5                 | 5   | 2                  | 4                  | 2811.3499 | -0.0051   | 8  | 3                 | 6                 | 8   | 2                  | 7                  | 4144.4075 | -0.0060   |
| 6  | 3                 | 3                 | 5   | 3                  | 2                  | 2818.4821 | -0.0011   | 9  | 0                 | 9                 | 8   | 0                  | 8                  | 4146.8516 | 0.0033    |
| 6  | 3                 | 4                 | 5   | 3                  | 3                  | 2817.8846 | -0.0056   | 9  | 1                 | 9                 | 8   | 1                  | 8                  | 4081.2990 | -0.0003   |
| 6  | 1                 | 6                 | 5   | 0                  | 5                  | 3362.8182 | 0.0049    | 9  | 1                 | 8                 | 8   | 1                  | 7                  | 4322.2770 | 0.0125    |
| 6  | 3                 | 3                 | 5   | 2                  | 4                  | 6931.1303 | -0.0001   | 9  | 2                 | 7                 | 8   | 2                  | 6                  | 4283.9072 | 0.0092    |
| 6  | 3                 | 4                 | 5   | 2                  | 3                  | 6906.5580 | -0.0004   | 9  | 2                 | 8                 | 8   | 2                  | 7                  | 4209.3349 | -0.0125   |
| 6  | 3                 | 3                 | 6   | 2                  | 4                  | 4072.7183 | 0.0028    | 9  | 3                 | 6                 | 8   | 3                  | 5                  | 4235.4439 | -0.0125   |
| 6  | 3                 | 4                 | 6   | 2                  | 5                  | 4118.8850 | -0.0002   | 9  | 3                 | 7                 | 8   | 3                  | 6                  | 4230.6017 | 0.0109    |
| 7  | 0                 | 7                 | 6   | 0                  | 6                  | 3246.6293 | -0.0033   | 9  | 4                 | 5                 | 8   | 4                  | 4                  | 4228.2264 | 0.0081    |
| 7  | 1                 | 7                 | 6   | 1                  | 6                  | 3179.5783 | 0.0001    | 9  | 4                 | 6                 | 8   | 4                  | 5                  | 4228.1088 | -0.0016   |
| 7  | 1                 | 6                 | 6   | 1                  | 5                  | 3369.4318 | -0.0004   | 9  | 5                 | 4                 | 8   | 5                  | 3                  | 4226.1287 | -0.0010   |
| 7  | 2                 | 5                 | 6   | 2                  | 4                  | 3314.9854 | -0.0013   | 9  | 5                 | 5                 | 8   | 5                  | 4                  | 4226.1287 | -0.0010   |
| 7  | 2                 | 6                 | 6   | 2                  | 5                  | 3278.1774 | -0.0021   | 9  | 6                 | 3                 | 8   | 6                  | 2                  | 4225.0956 | -0.0054   |
| 7  | 3                 | 4                 | 6   | 3                  | 3                  | 3289.8309 | -0.0014   | 9  | 6                 | 4                 | 8   | 6                  | 3                  | 4225.0956 | -0.0054   |
| 7  | 3                 | 5                 | 6   | 3                  | 4                  | 3288.5017 | 0.0002    | 9  | 0                 | 9                 | 8   | 1                  | 8                  | 3709.7226 | 0.0015    |
| 7  | 4                 | 3                 | 6   | 4                  | 2                  | 3286.9172 | 0.0061    | 9  | 1                 | 9                 | 8   | 0                  | 8                  | 4518.4211 | -0.0108   |
| 7  | 4                 | 4                 | 6   | 4                  | 3                  | 3286.9172 | 0.0061    | 9  | 2                 | 8                 | 8   | 1                  | 7                  | 6198.1354 | 0.0026    |

Table S24 (Continued).

| J' | K <sub>-1</sub> ' | K <sub>+1</sub> ' | J'' | K <sub>-1</sub> '' | K <sub>+1</sub> '' | Obs.      | Obs.-Cal. | J' | K <sub>-1</sub> ' | K <sub>+1</sub> ' | J'' | K <sub>-1</sub> '' | K <sub>+1</sub> '' | Obs.      | Obs.-Cal. |
|----|-------------------|-------------------|-----|--------------------|--------------------|-----------|-----------|----|-------------------|-------------------|-----|--------------------|--------------------|-----------|-----------|
| 9  | 3                 | 6                 | 9   | 2                  | 7                  | 3963.0512 | 0.0112    | 12 | 0                 | 12                | 11  | 1                  | 11                 | 5220.4656 | -0.0011   |
| 10 | 0                 | 10                | 9   | 0                  | 9                  | 4591.9952 | -0.0021   | 12 | 1                 | 12                | 11  | 0                  | 11                 | 5681.4625 | -0.0034   |
| 10 | 1                 | 10                | 9   | 1                  | 9                  | 4530.6937 | -0.0062   | 12 | 2                 | 11                | 11  | 1                  | 10                 | 7222.1241 | -0.0034   |
| 10 | 1                 | 9                 | 9   | 1                  | 8                  | 4795.6070 | 0.0067    | 13 | 0                 | 13                | 12  | 0                  | 12                 | 5914.8523 | 0.0005    |
| 10 | 2                 | 8                 | 9   | 2                  | 7                  | 4771.7779 | 0.0020    | 13 | 1                 | 13                | 12  | 1                  | 12                 | 5873.2651 | 0.0029    |
| 10 | 2                 | 9                 | 9   | 2                  | 8                  | 4673.4526 | -0.0004   | 13 | 1                 | 12                | 12  | 1                  | 11                 | 6198.5138 | -0.0009   |
| 10 | 3                 | 7                 | 9   | 3                  | 6                  | 4710.2044 | 0.0091    | 13 | 2                 | 11                | 12  | 2                  | 10                 | 6240.0009 | 0.0007    |
| 10 | 3                 | 8                 | 9   | 3                  | 7                  | 4701.9874 | 0.0108    | 13 | 2                 | 12                | 12  | 2                  | 11                 | 6058.8490 | -0.0014   |
| 10 | 4                 | 6                 | 9   | 4                  | 5                  | 4699.4698 | -0.0114   | 13 | 3                 | 10                | 12  | 3                  | 9                  | 6145.8999 | 0.0077    |
| 10 | 4                 | 7                 | 9   | 4                  | 6                  | 4699.2522 | 0.0050    | 13 | 3                 | 11                | 12  | 3                  | 10                 | 6116.1345 | 0.0111    |
| 10 | 5                 | 5                 | 9   | 5                  | 4                  | 4696.5744 | 0.0115    | 13 | 4                 | 9                 | 12  | 4                  | 8                  | 6116.6417 | -0.0073   |
| 10 | 5                 | 6                 | 9   | 5                  | 5                  | 4696.5744 | 0.0115    | 13 | 4                 | 10                | 12  | 4                  | 9                  | 6115.0977 | -0.0110   |
| 10 | 6                 | 4                 | 9   | 6                  | 3                  | 4695.1329 | -0.0033   | 13 | 5                 | 8                 | 12  | 5                  | 7                  | 6109.6050 | -0.0078   |
| 10 | 6                 | 5                 | 9   | 6                  | 4                  | 4695.1329 | -0.0033   | 13 | 5                 | 9                 | 12  | 5                  | 8                  | 6109.6050 | -0.0078   |
| 10 | 0                 | 10                | 9   | 1                  | 9                  | 4220.4285 | -0.0014   | 13 | 6                 | 7                 | 12  | 6                  | 6                  | 6106.4092 | -0.0019   |
| 10 | 1                 | 10                | 9   | 0                  | 9                  | 4902.2522 | -0.0152   | 13 | 6                 | 8                 | 12  | 6                  | 7                  | 6106.4092 | -0.0019   |
| 10 | 3                 | 7                 | 10  | 2                  | 8                  | 3901.4668 | 0.0073    | 13 | 0                 | 13                | 12  | 1                  | 12                 | 5708.6726 | -0.0095   |
| 10 | 3                 | 8                 | 10  | 2                  | 9                  | 4194.2036 | -0.0096   | 13 | 1                 | 13                | 12  | 0                  | 12                 | 6079.4403 | 0.0085    |
| 11 | 0                 | 11                | 10  | 0                  | 10                 | 5034.5708 | -0.0035   | 13 | 1                 | 12                | 12  | 2                  | 11                 | 4710.5208 | 0.0080    |
| 11 | 1                 | 11                | 10  | 1                  | 10                 | 4979.1321 | -0.0017   | 13 | 2                 | 11                | 13  | 1                  | 12                 | 2117.0818 | -0.0007   |
| 11 | 1                 | 10                | 10  | 1                  | 9                  | 5266.3543 | 0.0010    | 13 | 3                 | 10                | 13  | 2                  | 11                 | 3647.4340 | 0.0065    |
| 11 | 2                 | 9                 | 10  | 2                  | 8                  | 5260.9964 | 0.0038    | 14 | 0                 | 14                | 13  | 0                  | 13                 | 6353.8201 | 0.0021    |
| 11 | 2                 | 10                | 10  | 2                  | 9                  | 5136.4677 | -0.0014   | 14 | 1                 | 14                | 13  | 1                  | 13                 | 6319.0742 | -0.0060   |
| 11 | 3                 | 8                 | 10  | 3                  | 7                  | 5186.6494 | 0.0026    | 14 | 1                 | 13                | 13  | 1                  | 12                 | 6659.1514 | -0.0095   |
| 11 | 3                 | 9                 | 10  | 3                  | 8                  | 5173.4379 | -0.0015   | 14 | 2                 | 12                | 13  | 2                  | 11                 | 6728.1741 | 0.0125    |
| 11 | 4                 | 7                 | 10  | 4                  | 6                  | 5171.2630 | 0.0105    | 14 | 2                 | 13                | 13  | 2                  | 12                 | 6518.0813 | 0.0069    |
| 11 | 4                 | 8                 | 10  | 4                  | 7                  | 5170.7828 | -0.0029   | 14 | 3                 | 11                | 13  | 3                  | 10                 | 6629.2689 | 0.0079    |
| 11 | 5                 | 6                 | 10  | 5                  | 5                  | 5167.2611 | -0.0080   | 14 | 3                 | 12                | 13  | 3                  | 11                 | 6587.0546 | 0.0085    |
| 11 | 5                 | 7                 | 10  | 5                  | 6                  | 5167.2611 | -0.0080   | 14 | 4                 | 10                | 13  | 4                  | 9                  | 6590.5007 | -0.0121   |
| 11 | 7                 | 4                 | 10  | 7                  | 3                  | 5164.2731 | 0.0083    | 14 | 5                 | 9                 | 13  | 5                  | 8                  | 6581.2954 | -0.0121   |
| 11 | 7                 | 5                 | 10  | 7                  | 4                  | 5164.2731 | 0.0083    | 14 | 6                 | 8                 | 13  | 6                  | 7                  | 6577.2972 | 0.0104    |
| 11 | 0                 | 11                | 10  | 1                  | 10                 | 4724.2990 | -0.0053   | 14 | 6                 | 9                 | 13  | 6                  | 8                  | 6577.2972 | 0.0104    |
| 11 | 1                 | 11                | 10  | 0                  | 10                 | 5289.4113 | 0.0073    | 14 | 1                 | 14                | 13  | 0                  | 13                 | 6483.6656 | 0.0054    |
| 11 | 2                 | 10                | 10  | 1                  | 9                  | 6890.1814 | -0.0052   | 15 | 0                 | 15                | 14  | 0                  | 14                 | 6792.6297 | 0.0103    |
| 11 | 3                 | 9                 | 11  | 2                  | 10                 | 4231.1812 | -0.0023   | 15 | 1                 | 15                | 14  | 1                  | 14                 | 6764.1666 | -0.0023   |
| 12 | 0                 | 12                | 11  | 0                  | 11                 | 5475.2903 | -0.0060   | 15 | 2                 | 13                | 14  | 2                  | 12                 | 7214.5289 | -0.0011   |
| 12 | 1                 | 12                | 11  | 1                  | 11                 | 5426.6261 | -0.0103   | 15 | 3                 | 12                | 14  | 3                  | 11                 | 7115.3710 | -0.0115   |
| 12 | 1                 | 11                | 11  | 1                  | 10                 | 5734.1331 | 0.0074    | 15 | 3                 | 13                | 14  | 3                  | 12                 | 7057.4591 | -0.0135   |
| 12 | 2                 | 10                | 11  | 2                  | 9                  | 5750.6893 | 0.0019    | 16 | 0                 | 16                | 15  | 0                  | 15                 | 7231.5346 | 0.0059    |
| 12 | 2                 | 11                | 11  | 2                  | 10                 | 5598.2924 | -0.0016   | 16 | 1                 | 16                | 15  | 1                  | 15                 | 7208.6075 | -0.0039   |
| 12 | 3                 | 9                 | 11  | 3                  | 8                  | 5665.1083 | -0.0006   | 16 | 1                 | 15                | 15  | 1                  | 14                 | 7568.3080 | -0.0055   |
| 12 | 3                 | 10                | 11  | 3                  | 9                  | 5644.8739 | 0.0048    | 16 | 5                 | 11                | 15  | 5                  | 10                 | 7526.0149 | -0.0085   |
| 12 | 4                 | 8                 | 11  | 4                  | 7                  | 5643.5959 | -0.0132   | 16 | 5                 | 12                | 15  | 5                  | 11                 | 7525.7635 | 0.0047    |
| 12 | 4                 | 9                 | 11  | 4                  | 8                  | 5642.7359 | -0.0019   | 16 | 1                 | 16                | 15  | 0                  | 15                 | 7310.0003 | -0.0028   |
| 12 | 5                 | 7                 | 11  | 5                  | 6                  | 5638.2794 | 0.0031    | 17 | 0                 | 17                | 16  | 0                  | 16                 | 7670.6928 | -0.0017   |
| 12 | 5                 | 8                 | 11  | 5                  | 7                  | 5638.2794 | 0.0031    |    |                   |                   |     |                    |                    |           |           |
